# Supplementary material
Source: PubMed Central journal article supplement (PMC3825682)

# Table of Contents

## 1. Experimental Procedures

|    |                                                               |         |
|----|---------------------------------------------------------------|---------|
| a) | General Considerations                                        | 2 – 3   |
| b) | Synthesis of 3-Aryloxindoles                                  | 4 – 9   |
| c) | Synthesis of Allylidene Dipivalate                            | 9 – 10  |
| d) | General Procedure for Pd-AAA Optimization Studies (Table 1)   | 10      |
| e) | Synthesis of Enol Pivalates <b>2</b> , <b>5a-5o</b> (Table 2) | 11 – 23 |
| f) | Synthesis of Compounds <b>6-9</b>                             | 23 – 26 |

## 2. Analytical Data

|     |                                                |         |
|-----|------------------------------------------------|---------|
| (a) | <sup>1</sup> H and <sup>13</sup> C NMR Spectra | 27 – 70 |
|-----|------------------------------------------------|---------|

## 1. Experimental Procedures

**a) General Considerations:** Unless otherwise indicated, all reactions were performed in oven- or flame-dried glassware with magnetic stirring under a nitrogen or argon atmosphere. Air and moisture-sensitive liquids and solutions were transferred *via* oven-dried, stainless steel syringe or cannula and were introduced into the reaction vessel through rubber septa. Anhydrous PhMe, CH<sub>2</sub>Cl<sub>2</sub> and THF were obtained from a Seca solvent purification system by Glass Contour. 1,4-Dioxane was distilled from Na under nitrogen. 1,2-Dichloroethane was distilled from CaH<sub>2</sub> under nitrogen. *tert*-Butanol was purchased from Sigma-Aldrich and used as received. For use in Pd-AAA reactions, anhydrous and deoxygenated THF was obtained from a Na/benzophenone ketyl still under argon. All other solvents employed in the Pd-AAA were degassed *via* nitrogen or argon sparge (5 min / mL). Pd<sub>2</sub>dba<sub>3</sub>·CHCl<sub>3</sub> was prepared according to the procedure of Ibers.<sup>1</sup> Ligands **L1-L4** were prepared by literature procedures.<sup>2</sup>

Analytical thin-layer chromatography was performed on pre-coated 250 μm layer thickness silica gel 60 F<sub>254</sub> plates (EMD Chemicals Inc.). Visualization was performed by ultraviolet light fluorescence quenching and/or by staining with aqueous potassium permanganate, ceric ammonium molybdate, or *para*-anisaldehyde solutions followed by heating.

---

<sup>1</sup> T. Ukai, H. Kawazura, Y. Ishii, J. J. Bonnet, J. A. Ibers, *J. Organomet. Chem.* **1974**, *65*, 253.

<sup>2</sup> a) B. M. Trost, D. L. van Vranken, C. Bingel, *J. Am. Chem. Soc.* **1992**, *114*, 9327; b) B. M. Trost, R. Bunt, R. Lemoine, T. Calkins, *J. Am. Chem. Soc.* **2000**, *122*, 5968.

Unless otherwise indicated, flash column chromatography was performed using 40-63  $\mu\text{m}$  silica gel (Silicycle silica gel) using compressed air. The eluent employed for flash chromatography is reported as volume/volume ratios. Proton nuclear magnetic resonance ( $^1\text{H}$  NMR) spectra were acquired using a Varian Inova 600 MHz, Varian Inova 500 MHz, Varian Inova 300 MHz, or Varian Mercury 400 MHz spectrometer. Chemical shifts ( $\delta$ ) are reported in parts per million (ppm) and are calibrated to the residual solvent peak: proton ( $\text{CHCl}_3$ , 7.26 ppm). Coupling constants ( $J$ ) are reported in Hz. Multiplicities are reported using the following abbreviations: s = singlet; d = doublet; t = triplet; q = quartet; m = multiplet (range of multiplet is given). Carbon nuclear magnetic resonance ( $^{13}\text{C}$  NMR) spectra were recorded using a Varian Inova 150 MHz, Varian Inova 125 MHz, Varian Inova 75 MHz, or a Varian Mercury 100 MHz spectrometer. Chemical shifts ( $\delta$ ) are reported in parts per million (ppm) and are calibrated to the residual solvent peak: carbon ( $\text{CHCl}_3$ , 77.16 ppm).

Infrared spectroscopic data were recorded on a Thermo Scientific Nicolet IR100 FT-IR spectrometer, using thin films of the sample on NaCl plates. The absorbance frequencies are recorded in wavenumbers ( $\text{cm}^{-1}$ ). Chiral HPLC analysis was performed using an Agilent Technologies 1200 Series HPLC equipped with a Daicel Chemical Chiralpak® chiral stationary phase column (either IA: [amylose tris(3,5-dimethylphenylcarbamate) immobilized on silica support], IB: [cellulose tris(3,5-dimethylphenylcarbamate) immobilized on silica support], or IC: [cellulose tris(3,5-dichlorophenylcarbamate) immobilized on silica support]). HPLC retention times of enantiomers were determined by comparison to racemic materials, which were prepared using equimolar mixtures of (*R,R*)- and (*S,S*)-**L2**. Optical rotations were measured using a JASCO P2000 polarimeter using 5 cm glass cells with a sodium 589 nm filter and are reported as  $[\alpha]_{\text{D}}^{\text{T}}$ , concentration (g/100 mL), and solvent. Melting points were determined on a Thomas Hoover Capillary Melting Point Apparatus and are uncorrected. High-resolution mass spectra were acquired by the Vincent Coates Foundation Mass Spectrometry Laboratory, Stanford University Mass Spectrometry (<http://massspec.stanford.edu>).

## b) Synthesis of 3-Aryloxindoles

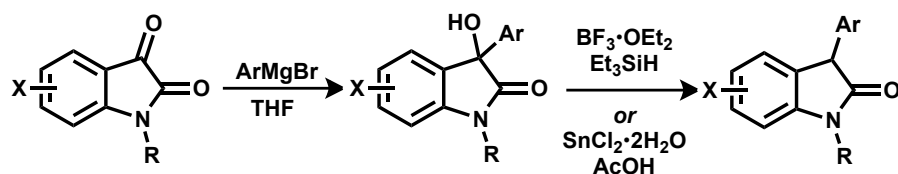

Oxindoles **4a**, **4d**, **4f**, **4h**, and **4i** were prepared *via* the above methods according to established literature procedures,<sup>3</sup> as were **1**,<sup>4</sup> **4k**,<sup>5</sup> and **4o**.<sup>6</sup>

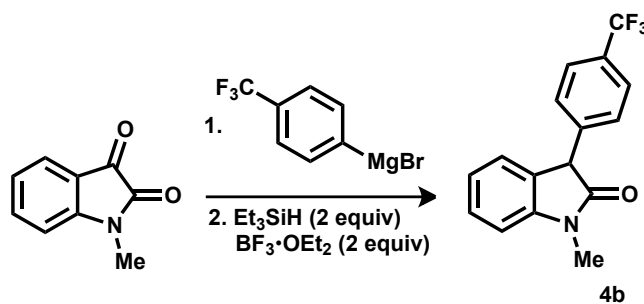

### Representative Procedure: Synthesis of **4b**.

To a 2-dram vial equipped with a stir bar was added Mg (58.3 mg, 2.4 mmol, 1.2 equivalents) and  $\text{I}_2$  (one crystal). The vial was sealed with a septum, evacuated and backfilled with nitrogen, and THF (2.4 mL) was added, followed by 4-bromobenzotrifluoride (0.34 mL, 0.54 g, 2.4 mmol, 1.2 equivalents). Exothermic formation of the Grignard reagent ensued (if necessary, the reaction was initiated by warming the solution to reflux), and the reaction mixture was stirred until complete consumption of  $\text{Mg}^0$  was observed and the solution had cooled to room temperature (*ca.* 1 h). The Grignard solution was then cannulated into a solution of *N*-methylisatin (322 mg, 2 mmol, 1 equivalent) in THF (6.7 mL) in a 25 mL round-bottom flask at 0 °C (ice/water bath). The reaction mixture was stirred for 1 h at this temperature, at which point it was quenched by the addition of saturated aqueous  $\text{NH}_4\text{Cl}$ . The solution was poured into EtOAc (10 mL), the phases were separated, and the aqueous phase was extracted with EtOAc (3 x 10 mL). The pooled organic phases were dried over  $\text{MgSO}_4$ , filtered, and concentrated. The crude material was dissolved in  $\text{CH}_2\text{Cl}_2$  (10 mL), and to this solution was added triethylsilane

<sup>3</sup> B. M. Trost, Y. Zhang, *J. Am. Chem. Soc.* **2007**, *129*, 14548.

<sup>4</sup> B. M. Trost, J. Xie, J. D. Sieber, *J. Am. Chem. Soc.* **2011**, *133*, 20611.

<sup>5</sup> M.-X. Zhao, Z.-W. Zhang, M.-X. Chen, W.-H. Tang, M. Shi, *Eur. J. Org. Chem.* **2011**, 3001.

<sup>6</sup> B. M. Trost, L. C. Czabaniuk, *J. Am. Chem. Soc.* **2010**, *132*, 15534.

(0.64 mL, 0.47 g, 4 mmol, 2 equivalents) dropwise followed by  $\text{BF}_3 \cdot \text{OEt}_2$  (0.49 mL, 0.57 g, 4 mmol, 2 equivalents) dropwise. The reaction mixture was stirred overnight, at which point it was quenched with saturated aqueous  $\text{NaHCO}_3$  and poured into EtOAc (10 mL). The phases were separated, and the aqueous phase was extracted with EtOAc (3 x 10 mL). The pooled organics were dried over  $\text{MgSO}_4$ , filtered, and concentrated. The residue was purified by column chromatography (4:1 hexanes:EtOAc) to afford **4b** (216 mg, 37%) as a white solid.

$R_f = 0.18$  (4:1 hexanes:EtOAc)

$^1\text{H NMR}$  (300 MHz;  $\text{CDCl}_3$ ):  $\delta$  7.61-7.58 (m, 2H), 7.40-7.32 (m, 3H), 7.17-7.07 (m, 2H), 6.93 (d,  $J = 7.8$  Hz, 1H), 4.67 (s, 1H), 3.26 (s, 3H).

$^{13}\text{C NMR}$  (125 MHz;  $\text{CDCl}_3$ ):  $\delta$  175.2, 144.6, 140.7, 129.0, 127.9, 125.9(7), 125.9(3), 125.9(1), 125.8(8), 125.2, 123.1, 108.6, 51.8, 26.7.

**IR**: 1696, 1609, 1494, 1468, 1377, 1330, 1167, 1110, 1067, 1019, 824, 752  $\text{cm}^{-1}$

**M.P.** = 128-129  $^\circ\text{C}$

**HRMS** (ESI): Calculated for  $\text{C}_{16}\text{H}_{12}\text{F}_3\text{NNaO}$  ( $\text{M}+\text{Na}$ ) $^+$ : 314.0763, Found 314.0756

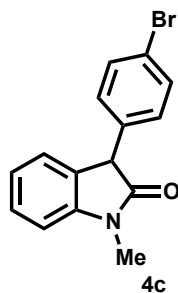

**4c**: Prepared according to the representative procedure from 1,4-dibromobenzene (566 mg, 2.4 mmol, 1.2 equivalents), Mg (58.3 mg, 2.4 mmol, 1.2 equivalents),  $\text{I}_2$  (one crystal), and *N*-methylisatin (322 mg, 2 mmol, 1 equivalent). The deoxygenation was performed with triethylsilane (0.64 mL, 0.47 g, 4 mmol, 2 equivalents) and  $\text{BF}_3 \cdot \text{OEt}_2$  (0.49 mL, 0.57 g, 4 mmol, 2 equivalents). Purification *via* column chromatography (4:1 hexanes:EtOAc) afforded **4c** (286 mg, 47%) as a white solid.

$R_f = 0.21$  (4:1 hexanes:EtOAc)

$^1\text{H NMR}$  (300 MHz;  $\text{CDCl}_3$ ):  $\delta$  7.48-7.43 (m, 2H), 7.38-7.30 (m, 1H), 7.22-7.05 (m, 4H), 6.91 (d,  $J = 7.8$  Hz, 1H), 4.57 (s, 1H), 3.25 (s, 3H).

$^{13}\text{C}$  NMR (75 MHz;  $\text{CDCl}_3$ ):  $\delta$  175.5, 144.6, 135.7, 132.1, 130.3, 128.8, 128.2, 125.1, 123.0, 121.8, 108.4, 51.5, 26.7.

IR: 1693, 1609, 1489, 1469, 1376, 1348, 1254, 1126, 1087, 1012, 813, 797, 751, 703, 665, 632  $\text{cm}^{-1}$

M.P. = 154-156  $^\circ\text{C}$

HRMS (ESI): Calculated for  $\text{C}_{15}\text{H}_{12}\text{BrNNaO}$  ( $\text{M}+\text{Na}$ ) $^+$ : 323.9994, Found 323.9984

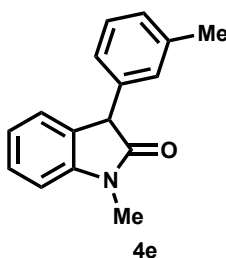

**4e**: Prepared according to the representative procedure from 3-bromotoluene (0.29 mL, 0.41 g, 2.4 mmol, 1.2 equivalents), Mg (58.3 mg, 2.4 mmol, 1.2 equivalents),  $\text{I}_2$  (one crystal) and *N*-methylisatin (322 mg, 2 mmol, 1 equivalent). The deoxygenation was performed with triethylsilane (0.64 mL, 0.47 g, 4 mmol, 2 equivalents) and  $\text{BF}_3 \cdot \text{OEt}_2$  (0.49 mL, 0.57 g, 4 mmol, 2 equivalents). Purification *via* column chromatography (4:1 hexanes:EtOAc) afforded **4e** (338 mg, 71%) as a light green solid.

$^1\text{H}$  NMR (500 MHz;  $\text{CDCl}_3$ ):  $\delta$  7.33 (t,  $J = 7.7$  Hz, 1H), 7.23-7.05 (m, 4H), 7.00-6.98 (m, 2H), 6.90 (d,  $J = 7.7$  Hz, 1H), 4.57 (s, 1H), 3.26 (s, 3H), 2.31 (s, 3H).

Analytical data matched literature data.<sup>7</sup>

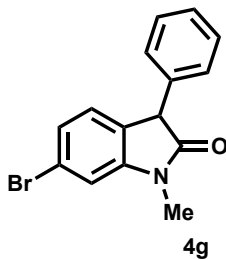

**4g**: Prepared according to the representative procedure from 6-bromo-*N*-methylisatin (475 mg, 2 mmol, 1 equivalent) and phenylmagnesium bromide (1 M in THF, 2.4 mL, 2.4 mmol, 1.2 equivalents). The deoxygenation was performed with triethylsilane (0.64 mL, 0.47 g, 4 mmol, 2

<sup>7</sup> L. Ackermann, R. Vicente, N. Hofmann, *Org. Lett.*, **2009**, *11*, 4274.

equivalents) and  $\text{BF}_3 \cdot \text{OEt}_2$  (0.49 mL, 0.57 g, 4 mmol, 2 equivalents). Purification *via* column chromatography (4:1 hexanes:ethyl acetate) afforded **4g** (255 mg, 42%) as a dark green solid.

$R_f = 0.26$  (4:1 hexanes:EtOAc)

$^1\text{H NMR}$  (300 MHz;  $\text{CDCl}_3$ ):  $\delta$  7.37-7.29 (m, 3H), 7.22-7.16 (m, 3H), 7.05-7.01 (m, 2H), 4.55 (s, 1H), 3.23 (s, 3H).

$^{13}\text{C NMR}$  (125 MHz;  $\text{CDCl}_3$ ):  $\delta$  175.8, 145.9, 136.0, 129.1, 128.4, 127.9, 126.4, 125.6, 122.1, 111.8, 95.6, 51.7, 26.7.

IR: 1718, 1606, 1492, 1364, 1245, 1091, 935, 756, 696  $\text{cm}^{-1}$

M.P. = 157-159  $^\circ\text{C}$

HRMS (ESI): Calculated for  $\text{C}_{15}\text{H}_{12}\text{BrNNaO}$  ( $\text{M}+\text{Na}$ ) $^+$ : 323.9994, Found 323.9987

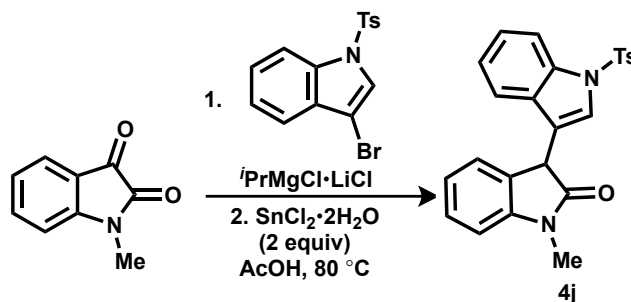

**4j**: Prepared according to the literature procedure.<sup>3</sup> To a solution of 3-bromo-*N*-tosylindole<sup>8</sup> (277 mg, 0.79 mmol, 1 equivalent) in THF (2.2 mL) at  $0\text{ }^\circ\text{C}$  (ice/water bath) was added  $i\text{PrMgCl} \cdot \text{LiCl}$  (Sigma-Aldrich, 1.3 M in THF, 0.72 mL, 0.94 mmol, 1.2 equivalents) dropwise. The solution was stirred at this temperature for 2 h, at which point a solution of *N*-methylisatin (127 mg, 0.79 mmol, 1 equivalent) in THF (5.3 mL) was added dropwise *via* cannula. The reaction mixture was stirred at  $0\text{ }^\circ\text{C}$  for 1 h, at which point it was quenched by the addition of saturated aqueous  $\text{NH}_4\text{Cl}$ . The mixture was poured into EtOAc (10 mL), the phases were separated, and the aqueous phase was extracted with EtOAc (3 x 10 mL). The pooled organics were dried over  $\text{MgSO}_4$ , filtered, concentrated, re-dissolved in AcOH (2.1 mL), and treated with  $\text{SnCl}_2 \cdot 2\text{H}_2\text{O}$  (357 mg, 1.6 mmol, 2 equivalents). The reaction mixture was heated to  $80\text{ }^\circ\text{C}$  for 11 h, at which point it was cooled to room temperature, quenched by the addition of saturated aqueous  $\text{NaHCO}_3$ , and poured into EtOAc (10 mL). The phases were separated and the aqueous phase was extracted with EtOAc (3 x 10 mL). The pooled organics were washed with 2N NaOH (10

<sup>8</sup> H. F. Hodson, D. J. Madge, A. N. Z. Slawin, D. A. Widdowson, D. J. Williams, *Tetrahedron*, **1994**, *50*, 1899.

mL), water (10 mL), and brine (10 mL), dried over MgSO<sub>4</sub>, filtered, and concentrated. The residue was purified *via* column chromatography (4:1 to 2:1 hexanes:EtOAc) to afford **4j** (199 mg, 60%) as a green solid.

<sup>1</sup>H NMR (500 MHz; CDCl<sub>3</sub>): δ 7.94 (dt, *J* = 8.4, 0.8 Hz, 1H), 7.77-7.75 (m, 2H), 7.42 (d, *J* = 0.7 Hz, 1H), 7.38-7.27 (m, 3H), 7.24-7.22 (m, 2H), 7.19-7.15 (m, 2H), 7.07 (td, *J* = 7.5, 0.9 Hz, 1H), 6.94 (d, *J* = 7.7 Hz, 1H), 4.82 (s, 1H), 3.28 (s, 3H), 2.35 (s, 3H).

*Analytical data matched literature data.*

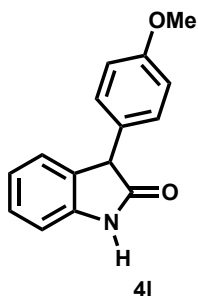

**4i**: Prepared according to the representative procedure from isatin (441 mg, 3 mmol, 1 equivalent) and (4-methoxyphenyl)magnesium bromide (7.8 mL of a 0.89 M solution in THF [6.9 mmol, 2.3 equivalents], itself prepared by the reaction of 4-bromoanisole [1.25 mL, 1.87 g, 10 mmol], Mg [240 mg, 9.9 mmol], and I<sub>2</sub> [one crystal] in 10 mL THF, as described in the representative procedure). The deoxygenation was performed according to the representative procedure using triethylsilane (0.96 mL, 0.70 g, 6 mmol, 2 equivalents) and BF<sub>3</sub>·OEt<sub>2</sub> (0.74 mL, 0.85 g, 6 mmol, 2 equivalents). Purification *via* column chromatography (4:1 to 1:1 hexanes:EtOAc) afforded **4i** (380 mg, 53%) as a pink solid.

<sup>1</sup>H NMR (500 MHz; CDCl<sub>3</sub>): δ 7.30-7.27 (m, 1H), 7.17-7.15 (m, 3H), 7.07 (t, *J* = 7.6 Hz, 1H), 6.95 (d, *J* = 7.8 Hz, 1H), 6.91-6.89 (m, 2H), 4.61 (s, 1H), 3.82 (s, 3H).

*Analytical data matched literature data.*<sup>9</sup>

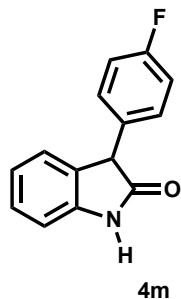

<sup>9</sup> R. A. Altman, A. M. Hyde, X. Huang, S. L. Buchwald, *J. Am. Chem. Soc.* **2008**, *130*, 9613.

**4m**: Prepared according to the representative procedure from isatin (294 mg, 2 mmol, 1 equivalent), 1-bromo-4-fluorobenzene (0.48 mL, 0.77 g, 4.4 mmol, 2.2 equivalents), Mg (107 mg, 4.4 mmol, 2.2 equivalents), and I<sub>2</sub> (one crystal). The deoxygenation was performed with triethylsilane (0.64 mL, 0.47 g, 4 mmol, 2 equivalents) and BF<sub>3</sub>·OEt<sub>2</sub> (0.49 mL, 0.57 g, 4 mmol, 2 equivalents). Purification *via* column chromatography (2:1 hexanes:EtOAc) afforded **4m** (276 mg, 61%) as a pink solid.

<sup>1</sup>H NMR (500 MHz; CDCl<sub>3</sub>): δ 7.28-7.26 (m, 1H), 7.21-7.18 (m, 2H), 7.13 (d, *J* = 7.5 Hz, 1H), 7.07-7.02 (m, 3H), 6.94 (d, *J* = 7.9 Hz, 1H), 4.61 (s, 1H).

Analytical data matched literature data.<sup>10</sup>

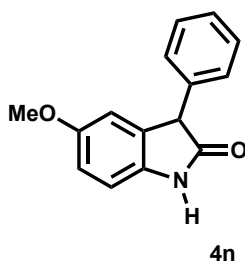

**4n**: Prepared according to the representative procedure from 5-methoxyisatin (354 mg, 2 mmol) and phenylmagnesium bromide (1 M in THF, 4.8 mL, 4.8 mmol, 2.4 equivalents). The deoxygenation was performed with triethylsilane (0.64 mL, 0.47 g, 4 mmol, 2 equivalents) and BF<sub>3</sub>·OEt<sub>2</sub> (0.49 mL, 0.57 g, 4 mmol, 2 equivalents). Purification *via* column chromatography (1:1 hexanes:EtOAc) afforded **4n** (127 mg, 27%) as a light pink solid.

<sup>1</sup>H NMR (400 MHz; CDCl<sub>3</sub>): δ 7.37-7.30 (m, 3H), 7.23-7.21 (m, 2H), 6.85-6.78 (m, 2H), 6.74-6.72 (s, 1H), 4.61 (s, 1H), 3.74 (s, 3H).

Analytical data matched literature data.<sup>9</sup>

### c) Synthesis of Allylidene Dipivalate

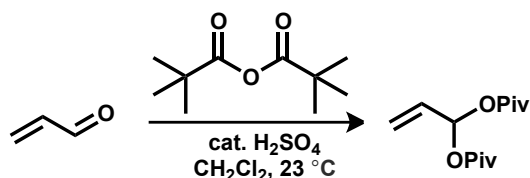

Prepared according to the procedure of Lombardo and coworkers.<sup>11</sup> To a solution of trimethylacetic anhydride (5.0 mL, 4.6 g, 24.7 mmol, 1 equivalent) in CH<sub>2</sub>Cl<sub>2</sub> (27 mL) was

<sup>10</sup> Y. Cai, J. Li, W. Chen, M. Xie, X. Liu, L. Lin, X. Feng, *Org. Lett.* **2012**, *14*, 2726.



added 4 drops of conc. H<sub>2</sub>SO<sub>4</sub>. A solution of acrolein (2.1 mL, 1.8 g, 31.4 mmol, 1.3 equivalents) in CH<sub>2</sub>Cl<sub>2</sub> (3 mL) was introduced dropwise, at a rate sufficient to maintain the reaction at room temperature. The reaction mixture, the appearance of which progressed from clear and colorless to light yellow, was stirred for 16 h at room temperature. It was then filtered through a large pipet plug of K<sub>2</sub>CO<sub>3</sub>, concentrated, and passed through a column of SiO<sub>2</sub>, eluting with 10:1 hexanes:EtOAc, to afford allylidene dipivalate (4.82 g, 81%) as a clear, colorless oil.

$\rho = 0.94$

<sup>1</sup>H NMR (400 MHz; CDCl<sub>3</sub>):  $\delta$  7.11 (dt,  $J = 5.2, 1.1$  Hz, 1H), 5.91 (ddd,  $J = 17.3, 10.6, 5.2$  Hz, 1H), 5.53 (dt,  $J = 17.3, 1.1$  Hz, 1H), 5.38 (dt,  $J = 10.6, 1.1$  Hz, 1H), 1.21 (s, 18H).

Analytical data matched literature data.

#### d) General Procedure for Pd-AAA Optimization Studies (Table 1)

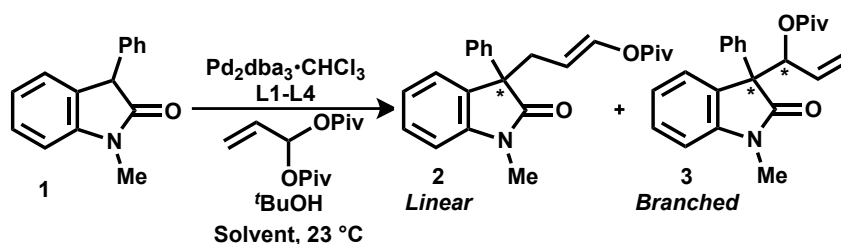

An oven-dried, desiccator-cooled Biotage® microwave vial (0.5 - 2.0 mL size) was charged with a stir bar, oxindole **1** (11.2 mg, 0.05 mmol, 1 equivalent), Pd<sub>2</sub>dba<sub>3</sub>·CHCl<sub>3</sub> (2.6 mg, 0.0025 mmol, 0.05 equivalent), and (*R,R*)-ligand (**L1-L4**, 0.0075 mmol, 0.15 equivalent). The vial was sealed with a septum-lined microwave cap and evacuated and backfilled with Ar three times. Previously degassed solvent (0.25 mL) was added, followed by <sup>t</sup>BuOH (24.0  $\mu$ L, 18.6 mg, 0.25 mmol, 5.0 equivalents, omitted when pure <sup>t</sup>BuOH was the reaction solvent). The reaction mixture was stirred until it was homogeneous and an orange color persisted (*ca.* 10 min), then allylidene dipivalate (19.5  $\mu$ L, 18.3 mg, 0.075 mmol, 1.5 equivalents) was added. The argon inlet was removed, and the pierced septum cap was sealed thoroughly with electrical tape and Parafilm®. The reaction mixture was stirred at room temperature for 24 h, then the septum cap was removed and pH 7 buffer (1 mL) was added. Et<sub>2</sub>O (1 mL) was added, the phases were separated, and the aqueous phase was extracted with Et<sub>2</sub>O (2 x 1 mL). The pooled organic phases were dried over MgSO<sub>4</sub>, filtered, and concentrated *in vacuo*. To the residue was added

<sup>11</sup> M. Lombardo, S. Licciulli, F. Pasi, G. Angelici, C. Trombini, *Adv. Synth. Catal.* **2005**, 347, 2015.

mesitylene (previously distilled from CaH<sub>2</sub> and stored under N<sub>2</sub>), and the resulting mixture was analyzed by <sup>1</sup>H NMR to obtain conversion, regioselectivity, and yield. Purification by preparative thin-layer chromatography (4:1 hexanes:EtOAc) delivered analytical samples for chiral HPLC analysis.

### e) Synthesis of Enol Pivalates **2**, **5a-5o** (Table 2)

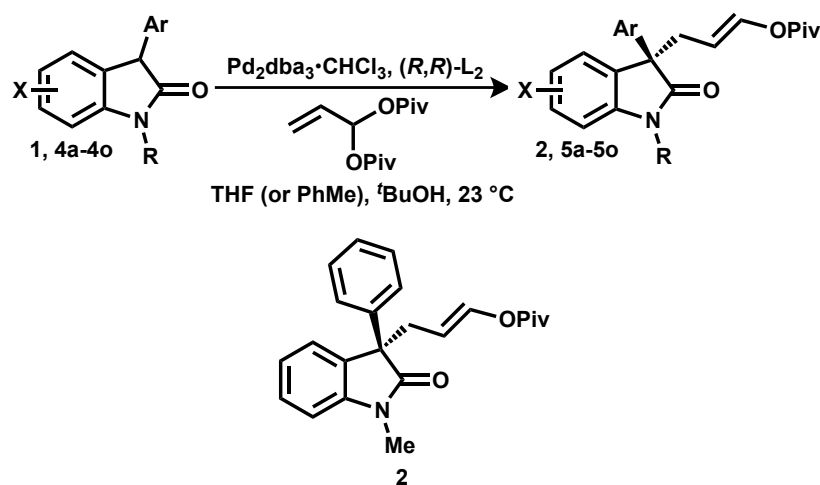

**Representative Procedure: Synthesis of 2.** An oven-dried, desiccator cooled Biotage® microwave vial (0.5 - 2.0 mL size) was charged with a stir bar, oxindole **1** (22.4 mg, 0.10 mmol, 1 equivalent), Pd<sub>2</sub>dba<sub>3</sub>·CHCl<sub>3</sub> (2.6 mg, 0.0025 mmol, 0.025 equivalent), and (R,R)-L<sub>2</sub> (5.9 mg, 0.0075 mmol, 0.075 equivalent). The vial was sealed with a septum-lined microwave cap and evacuated and backfilled with Ar or N<sub>2</sub> three times. THF (0.25 mL) was added, followed by <sup>t</sup>BuOH (48.0 μL, 37.2 mg, 0.50 mmol, 5.0 equivalents). The reaction mixture was stirred until it was homogeneous and an orange color persisted (*ca.* 10 min), then allylidene dipivalate (39.0 μL, 36.7 mg, 0.15 mmol, 1.5 equivalents) was added. The gas inlet was removed, and the pierced septum cap was sealed thoroughly with electrical tape and Parafilm®. The reaction mixture was stirred at room temperature for 24 h, then the septum cap was removed and the reaction mixture was poured into a mixture of Et<sub>2</sub>O (10 mL) and saturated aqueous NaHCO<sub>3</sub> (10 mL). The phases were separated, and the aqueous phase was extracted with Et<sub>2</sub>O (2 x 5 mL). The pooled organic phases were dried over MgSO<sub>4</sub>, filtered, and concentrated *in vacuo*. The residue was purified by column chromatography (6:1 to 4:1 hexanes:EtOAc), affording **2** (33.1 mg, 91%, >19:1 linear:branched, 92% ee) as a viscous, light yellow oil.

The larger-scale synthesis of **2** was performed in a 2.0 – 5.0 mL size microwave vial with **1** (223.0 mg, 1.0 mmol, 1 equivalent), Pd<sub>2</sub>dba<sub>3</sub>·CHCl<sub>3</sub> (25.9 mg, 0.025 mmol, 0.025 equivalent), **L2** (59.2 mg, 0.075 mmol, 0.075 equivalent), allylidene dipivalate (387 μL, 364 mg, 1.5 mmol, 1.5 equivalents), <sup>t</sup>BuOH (478 μL, 370 mg, 5.0 mmol, 5.0 equivalents) in THF (2.5 mL) for 24 h. It was then poured into a mixture of Et<sub>2</sub>O (50 mL) and saturated aqueous NaHCO<sub>3</sub> (50 mL). The phases were separated, and the aqueous phase was extracted with Et<sub>2</sub>O (50 mL). The pooled organics were washed with water (2 x 25 mL) then brine (25 mL), dried over MgSO<sub>4</sub>, filtered, and concentrated *in vacuo*. The residue was purified by column chromatography (6:1 to 4:1 hexanes:EtOAc), affording **2** (327 mg, 90%, >19:1 linear:branched, 90% ee) as a viscous yellow oil.

**R<sub>f</sub>** = 0.38 (4:1 hexanes:EtOAc)

**<sup>1</sup>H NMR** (400 MHz; CDCl<sub>3</sub>): δ 7.39-7.27 (m, 6H), 7.25-7.24 (m, 1H), 7.13 (td, *J* = 7.5, 1.0 Hz, 1H), 7.00 (dt, *J* = 12.4, 1.2 Hz, 1H), 6.91 (d, *J* = 7.8 Hz, 1H), 5.05 (ddd, *J* = 12.4, 9.0, 6.7 Hz, 1H), 3.21 (s, 3H), 3.02 (ddd, *J* = 14.0, 6.6, 1.6 Hz, 1H), 2.90 (ddd, *J* = 14.0, 9.0, 1.0 Hz, 1H), 1.15 (s, 9H).

**<sup>13</sup>C NMR** (100 MHz; CDCl<sub>3</sub>): δ 177.9, 175.5, 143.9, 139.2, 138.9, 131.5, 128.7, 128.5, 127.6, 127.2, 125.4, 122.7, 108.5, 108.3, 56.5, 38.7, 36.0, 27.0, 26.6

**IR**: 3057, 2974, 2934, 1743, 1716, 1673, 1612, 1484, 1471, 1372, 1349, 1278, 1143 cm<sup>-1</sup>

**Chiral HPLC**: IA, 95:5 heptane:isopropanol, 0.8 mL/min, 254 nm, 12.35 min (minor), 15.52 (major).

**[α]<sub>D</sub><sup>23</sup>** = + 74.2° (c = 0.29, CHCl<sub>3</sub>)

**HRMS** (ESI): Calculated for C<sub>23</sub>H<sub>25</sub>NNaO<sub>3</sub> (M+Na)<sup>+</sup>: 386.1727, Found 386.1720

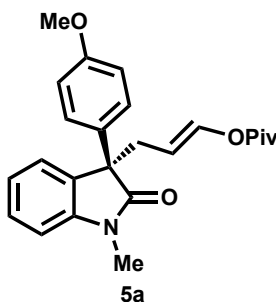

**5a**: Prepared according to representative procedure from **4a** (25.3 mg, 0.10 mmol), in THF for 48 h. Purification *via* column chromatography (4:1 hexanes:EtOAc) afforded **5a** (34.7 mg, 88%, >19:1 linear:branched, 83% ee) as a viscous light yellow oil.

$R_f$  = 0.42 (4:1 hexanes:EtOAc)

$^1\text{H NMR}$  (400 MHz;  $\text{CDCl}_3$ ):  $\delta$  7.37-7.27 (m, 3H), 7.26-7.23 (m, 1H), 7.13 (td,  $J$  = 7.5, 1.0 Hz, 1H), 6.99 (dt,  $J$  = 12.4, 1.3 Hz, 1H), 6.90 (d,  $J$  = 7.8 Hz, 1H), 6.85-6.82 (m, 2H), 5.05 (ddd,  $J$  = 12.4, 9.0, 6.6 Hz, 1H), 3.77 (s, 3H), 3.20 (s, 3H), 2.98 (ddd,  $J$  = 14.1, 6.6, 1.6 Hz, 1H), 2.85 (ddd,  $J$  = 14.1, 9.0, 1.0 Hz, 1H), 1.15 (s, 9H).

$^{13}\text{C NMR}$  (125 MHz;  $\text{CDCl}_3$ ):  $\delta$  178.2, 175.5, 159.0, 143.9, 138.8, 131.6, 131.1, 128.4(3), 128.3(5), 125.3, 122.7, 114.1, 108.4(4), 108.4(2), 66.0, 55.8, 55.4, 38.7, 27.0, 26.5.

**IR**: 2970, 2934, 1741, 1714, 1673, 1610, 1511, 1493, 1470, 1372, 1349, 1278, 1252, 1184, 1142, 1035, 934, 754  $\text{cm}^{-1}$

**Chiral HPLC**: IA, 95:5 heptane:isopropanol, 0.8 mL/min, 254 nm, 17.04 min (minor), 27.22 (major).

$[\alpha]_D^{23}$  = + 88.0° (c = 0.27,  $\text{CHCl}_3$ )

**HRMS** (ESI): Calculated for  $\text{C}_{24}\text{H}_{27}\text{NNaO}_4$  ( $\text{M}+\text{Na}$ ) $^+$ : 416.1832, Found 416.1828.

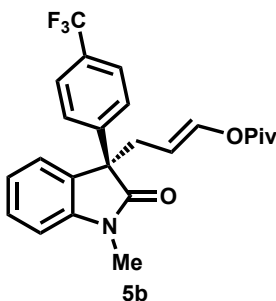

**5b**: Prepared according to the representative procedure from **4b** (29.1 mg, 0.10 mmol) in PhMe for 24 h. Purification *via* column chromatography (4:1 hexanes:EtOAc) afforded **5b** (42.4 mg, 98%, >19:1 linear:branched, 90% ee) as a viscous, light yellow oil.

$R_f$  = 0.36 (4:1 hexanes:EtOAc)

$^1\text{H NMR}$  (400 MHz;  $\text{CDCl}_3$ ):  $\delta$  7.58-7.51 (m, 4H), 7.38 (td,  $J$  = 7.7, 1.3 Hz, 1H), 7.25-7.24 (m, 1H), 7.16 (td,  $J$  = 7.5, 0.9 Hz, 1H), 7.01 (dt,  $J$  = 12.4, 1.2 Hz, 1H), 6.94 (d,  $J$  = 7.7 Hz, 1H), 5.03 (ddd,  $J$  = 12.4, 9.0, 6.6 Hz, 1H), 3.22 (s, 3H), 3.02 (ddd,  $J$  = 14.0, 6.7, 1.5 Hz, 1H), 2.90 (ddd,  $J$  = 14.0, 9.0, 0.9 Hz, 1H), 1.16 (s, 9H).

$^{13}\text{C}$  NMR (100 MHz;  $\text{CDCl}_3$ ):  $\delta$  177.2, 175.4, 143.9, 143.1, 139.2, 130.6, 128.9, 127.8, 125.7(0), 125.6(6), 125.6(3), 125.4, 123.0, 108.8, 107.7, 56.4, 38.7, 36.2, 27.0, 26.7.

IR: 2975, 1744, 1716, 1613, 1472, 1411, 1372, 1327, 1279, 1140, 1071, 1018, 934, 845, 754  $\text{cm}^{-1}$

Chiral HPLC: IB, 95:5 heptane:isopropanol, 0.8 mL/min, 254 nm, 8.75 min (minor), 9.56 (major).

$[\alpha]_{\text{D}}^{23} = +73.4^\circ$  ( $c = 0.53$ ,  $\text{CHCl}_3$ )

HRMS (ESI): Calculated for  $\text{C}_{24}\text{H}_{24}\text{F}_3\text{NNaO}_3$  ( $\text{M}+\text{Na}$ ) $^+$ : 454.1600, Found 454.1589.

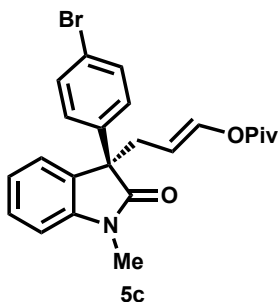

**5c**: Prepared according to the representative procedure from **4c** (30.2 mg, 0.10 mmol) in PhMe for 24 h. Purification *via* column chromatography (6:1 hexanes:EtOAc) afforded **5c** (36.4 mg, 82%, >19:1 linear:branched, 88% ee) as a viscous, light yellow oil.

$R_f = 0.40$  (4:1 hexanes:EtOAc)

$^1\text{H}$  NMR (400 MHz;  $\text{CDCl}_3$ ):  $\delta$  7.45-7.34 (m, 3H), 7.28-7.26 (m, 1H), 7.26-7.22 (m, 2H), 7.14 (td,  $J = 7.5, 1.0$  Hz, 1H), 6.99 (dt,  $J = 12.4, 1.2$  Hz, 1H), 6.92 (d,  $J = 7.8$  Hz, 1H), 5.03 (ddd,  $J = 12.4, 9.0, 6.6$  Hz, 1H), 3.20 (s, 3H), 2.97 (ddd,  $J = 14.0, 6.6, 1.6$  Hz, 1H), 2.84 (ddd,  $J = 14.0, 9.0, 1.0$  Hz, 1H), 1.16 (s, 9H).

$^{13}\text{C}$  NMR (100 MHz;  $\text{CDCl}_3$ ):  $\delta$  177.4, 175.4, 143.9, 139.0, 138.2, 131.8, 130.8, 129.1, 128.8, 125.3, 122.9, 121.8, 108.7, 107.9, 56.0, 38.7, 36.1, 27.0, 26.6.

IR: 2973, 1743, 1415, 1673, 1612, 1490, 1396, 1371, 1350, 1278, 1142, 1010, 934, 754  $\text{cm}^{-1}$

Chiral HPLC: IB, 95:5 heptane:isopropanol, 0.8 mL/min, 254 nm, 9.29 min (minor), 10.41 (major).

$[\alpha]_{\text{D}}^{23} = +86.9^\circ$  ( $c = 0.28$ ,  $\text{CHCl}_3$ )

HRMS (ESI): Calculated for  $\text{C}_{23}\text{H}_{24}\text{BrNNaO}_3$  ( $\text{M}+\text{Na}$ ) $^+$ : 464.0832, Found 464.0828.

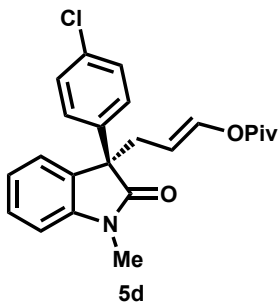

**5d**: Prepared according to the representative procedure from **4d** (25.7 mg, 0.10 mmol) in PhMe for 24 h. Purification *via* column chromatography (6:1 hexanes:EtOAc) afforded **5d** (37.0 mg, 93%, >19:1 linear:branched, 88% ee) as a viscous, light yellow oil.

$R_f$  = 0.38 (4:1 hexanes:EtOAc)

$^1\text{H NMR}$  (400 MHz;  $\text{CDCl}_3$ ):  $\delta$  7.43-7.26 (m, 5H), 7.24 (dd,  $J$  = 7.4, 0.8 Hz, 1H), 7.15 (td,  $J$  = 7.5, 1.0 Hz, 1H), 7.00 (dt,  $J$  = 12.4, 1.2 Hz, 1H), 6.92 (d,  $J$  = 7.7 Hz, 1H), 5.03 (ddd,  $J$  = 12.4, 9.0, 6.6 Hz, 1H), 3.20 (s, 3H), 2.97 (ddd,  $J$  = 14.0, 6.6, 1.6 Hz, 1H), 2.84 (ddd,  $J$  = 14.0, 9.0, 0.9 Hz, 1H), 1.16 (s, 9H).

$^{13}\text{C NMR}$  (100 MHz;  $\text{CDCl}_3$ ):  $\delta$  177.5, 175.4, 143.9, 139.1, 137.6, 133.6, 130.9, 128.8, 128.7(5), 128.7(3), 125.4, 122.9, 108.7, 108.0, 56.0, 38.7, 36.2, 27.0, 26.6.

**IR**: 2974, 2934, 1743, 1715, 1673, 1612, 1492, 1472, 1399, 1372, 1351, 1278, 1143, 1096, 1015, 935, 754  $\text{cm}^{-1}$

**Chiral HPLC**: IB, 95:5 heptane:isopropanol, 0.8 mL/min, 254 nm, 8.95 min (minor), 10.00 (major).

$[\alpha]_{\text{D}}^{23}$  = + 81.0° ( $c$  = 0.33,  $\text{CHCl}_3$ )

**HRMS** (ESI): Calculated for  $\text{C}_{23}\text{H}_{24}\text{ClNNaO}_3$  ( $\text{M}+\text{Na}$ ) $^+$ : 420.1337, Found 420.1327.

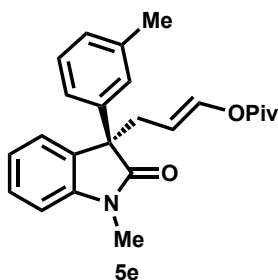

**5e**: Prepared according to the representative procedure from **4e** (23.7 mg, 0.10 mmol) in THF for 24 h. Purification *via* column chromatography (6:1 to 4:1 hexanes:EtOAc) afforded **5e** (32.7 mg, 87%, >19:1 linear:branched, 88% ee) as a viscous, light yellow oil.

$R_f$  = 0.37 (4:1 hexanes:EtOAc)

**<sup>1</sup>H NMR** (400 MHz; CDCl<sub>3</sub>): δ 7.35 (td, *J* = 7.7, 1.3 Hz, 1H), 7.25-7.06 (m, 6H), 7.00 (dt, *J* = 12.5, 1.2 Hz, 1H), 6.91 (d, *J* = 7.8 Hz, 1H), 5.04 (ddd, *J* = 12.4, 9.0, 6.6 Hz, 1H), 3.21 (s, 3H), 3.00 (ddd, *J* = 14.0, 6.6, 1.6 Hz, 1H), 2.89 (ddd, *J* = 14.0, 9.0, 0.9 Hz, 1H), 2.31 (s, 3H), 1.15 (s, 9H).

**<sup>13</sup>C NMR** (125 MHz; CDCl<sub>3</sub>): δ 178.0, 175.5, 143.9, 139.1, 138.8, 138.4, 131.6, 128.6, 128.4(2), 128.3(8), 127.8, 125.3, 124.2, 122.7, 108.4(1), 108.3(9), 56.4, 38.7, 35.6, 27.0, 26.6, 21.8.

**IR**: 2972, 2931, 1743, 1716, 1673, 1612, 1492, 1471, 1371, 1348, 1278, 1142, 934, 753, 697 cm<sup>-1</sup>

**Chiral HPLC**: IB, 95:5 heptane:isopropanol, 0.8 mL/min, 254 nm, 8.25 min (minor), 9.29 (major).

**[α]<sub>D</sub><sup>23</sup>** = + 80.7° (c = 0.24, CHCl<sub>3</sub>)

**HRMS** (ESI): Calculated for C<sub>24</sub>H<sub>27</sub>NNaO<sub>3</sub> (M+Na)<sup>+</sup>: 400.1883, Found 400.1883.

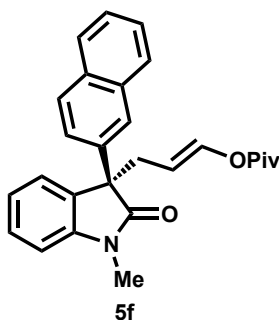

**5f**: Prepared according to the representative procedure from **4f** (27.3 mg, 0.10 mmol) in THF for 24 h. Purification *via* column chromatography (6:1 hexanes:EtOAc) afforded **5f** (36.6 mg, 89%, >19:1 linear:branched, 90% ee) as a viscous, light yellow oil.

**R<sub>f</sub>** = 0.26 (4:1 hexanes:EtOAc)

**<sup>1</sup>H NMR** (500 MHz; CDCl<sub>3</sub>): δ 7.81-7.76 (m, 4H), 7.56 (dd, *J* = 8.7, 2.0 Hz, 1H), 7.46-7.44 (m, 2H), 7.39 (td, *J* = 7.7, 1.3 Hz, 1H), 7.32-7.31 (m, 1H), 7.17 (td, *J* = 7.5, 1.1 Hz, 1H), 7.05 (dt, *J* = 12.4, 1.3 Hz, 1H), 6.96 (d, *J* = 7.8 Hz, 1H), 5.11 (ddd, *J* = 12.4, 9.1, 6.5 Hz, 1H), 3.24 (s, 3H), 3.15 (ddd, *J* = 14.0, 6.5, 1.6 Hz, 1H), 3.00 (ddd, *J* = 14.0, 9.1, 1.0 Hz, 1H), 1.16 (s, 9H).

**<sup>13</sup>C NMR** (100 MHz; CDCl<sub>3</sub>): δ 177.9, 175.4, 144.0, 138.9, 136.6, 133.3, 132.7, 131.5, 128.6, 128.5, 128.3, 127.6, 126.2(4), 126.1(8), 125.5, 125.2, 122.8, 108.6, 108.3, 56.6, 38.7, 35.8, 27.0, 26.6.

**IR**: 2973, 2918, 1743, 1716, 1673, 1612, 1494, 1471, 1372, 1347, 1277, 1142, 1023, 933, 815, 751, 693 cm<sup>-1</sup>

**Chiral HPLC:** IA, 95:5 heptane:isopropanol, 0.8 mL/min, 254 nm, 17.50 min (minor), 27.55 (major).

$[\alpha]_D^{24} = +63.2^\circ$  ( $c = 0.61$ ,  $\text{CHCl}_3$ )

**HRMS (ESI):** Calculated for  $\text{C}_{27}\text{H}_{27}\text{NNaO}_3$  ( $\text{M}+\text{Na}$ )<sup>+</sup>: 436.1883, Found 436.1874.

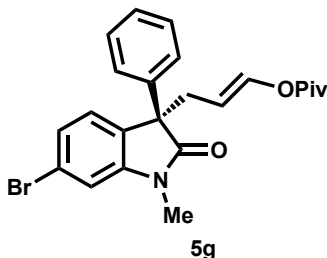

**5g:** Prepared according to the representative procedure from **4g** (30.2 mg, 0.10 mmol) in PhMe for 24 h. For this reaction, the product and dibenzylideneacetone were very nearly copolar on silica gel (TLC). Therefore, after workup, the crude material was concentrated into a 2-dram vial, treated with a solution of 2-aminoethanethiol (2.3 mg, 0.03 mmol, 0.30 equivalent) in PhMe (0.50 mL), and stirred at room temperature for 1 h. This mixture was then directly applied to a silica gel column and eluted with 8:1 hexanes:EtOAc. This afforded **5g** (39.1 mg, 88%, >19:1 linear:branched, 94% ee) as a viscous, light pink oil.

$R_f = 0.19$  (8:1 hexanes:EtOAc)

**<sup>1</sup>H NMR** (500 MHz;  $\text{CDCl}_3$ ):  $\delta$  7.35-7.26 (m, 6H), 7.11 (dd,  $J = 7.9, 0.3$  Hz, 1H), 7.06 (d,  $J = 1.7$  Hz, 1H), 7.01 (dq,  $J = 12.4, 0.8$  Hz, 1H), 5.02 (ddd,  $J = 12.4, 9.1, 6.6$  Hz, 1H), 3.19 (s, 3H), 3.00 (ddd,  $J = 14.1, 6.6, 1.6$  Hz, 1H), 2.88 (ddd,  $J = 14.1, 9.1, 1.0$  Hz, 1H), 1.17 (s, 9H).

**<sup>13</sup>C NMR** (125 MHz;  $\text{CDCl}_3$ ):  $\delta$  177.7, 175.5, 145.3, 139.1, 138.5, 130.3, 128.9, 127.8, 127.1, 126.7, 125.5, 122.1, 112.0, 107.9, 56.3, 38.7, 35.8, 27.0, 26.7.

**IR:** 2973, 2931, 1742, 1721, 1604, 1492, 1465, 1366, 1278, 1141, 932  $\text{cm}^{-1}$

**Chiral HPLC:** IB, 98:2 heptane:isopropanol, 0.8 mL/min, 254 nm, 13.92 min (major), 17.11 (minor).

$[\alpha]_D^{24} = +66.6^\circ$  ( $c = 0.46$ ,  $\text{CHCl}_3$ )

**HRMS (ESI):** Calculated for  $\text{C}_{23}\text{H}_{24}\text{BrNNaO}_3$  ( $\text{M}+\text{Na}$ )<sup>+</sup>: 464.0832, Found 464.0826.



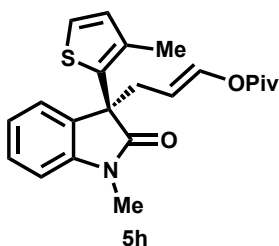

**5h:** Prepared according to the representative procedure from **4h** (24.4 mg, 0.10 mmol) in THF for 24 h. Purification *via* column chromatography (6:1 hexanes:EtOAc) afforded **5h** (34.8 mg, 91%, >19:1 linear:branched, 96% ee) as a viscous, light yellow oil.

$R_f = 0.17$  (6:1 hexanes:EtOAc)

$^1\text{H NMR}$  (500 MHz;  $\text{CDCl}_3$ ):  $\delta$  7.31 (td,  $J = 7.7, 1.5$  Hz, 1H), 7.12 (ddd,  $J = 7.4, 1.4, 0.6$  Hz, 1H), 7.09-7.05 (m, 2H), 6.99 (dt,  $J = 12.4, 1.3$  Hz, 1H), 6.88 (ddd,  $J = 7.8, 0.9, 0.6$  Hz, 1H), 6.75 (dd,  $J = 5.1, 0.4$  Hz, 1H), 5.00 (ddd,  $J = 12.4, 8.6, 7.1$  Hz, 1H), 3.25 (s, 3H), 3.10-3.01 (m, 2H), 1.71 (s, 3H), 1.15 (s, 9H).

$^{13}\text{C NMR}$  (100 MHz;  $\text{CDCl}_3$ ):  $\delta$  176.6, 175.3, 143.6, 139.4, 135.7, 134.5, 132.1, 131.5, 128.6, 124.3, 123.1, 122.2, 108.1, 107.2, 54.1, 38.7, 36.6, 27.0, 26.4, 14.4.

**IR:** 2970, 2917, 1743, 1719, 1673, 1611, 1493, 1470, 1371, 1349, 1278, 1141, 752  $\text{cm}^{-1}$

**Chiral HPLC:** IB, 98:2 heptane:isopropanol, 0.8 mL/min, 254 nm, 13.72 min (minor), 15.96 (major).

$[\alpha]_D^{24} = -10.5^\circ$  ( $c = 0.53$ ,  $\text{CHCl}_3$ )

**HRMS** (ESI): Calculated for  $\text{C}_{22}\text{H}_{25}\text{NNaO}_3\text{S}$  ( $\text{M}+\text{Na}$ ) $^+$ : 406.1447, Found 406.1441.

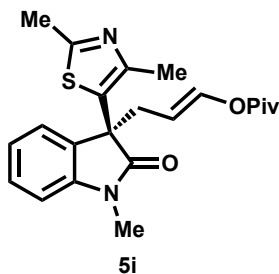

**5i:** Prepared according to the representative procedure from **4i** (25.8 mg, 0.10 mmol) in THF for 24 h. Purification *via* column chromatography (2:1 to 1:1 hexanes:EtOAc) afforded **5i** (38.4 mg, 96%, >19:1 linear:branched, 95% ee) as a viscous, light yellow oil.

$R_f = 0.40$  (1:1 hexanes:EtOAc)

**<sup>1</sup>H NMR** (400 MHz; CDCl<sub>3</sub>): δ 7.33 (ddd, *J* = 7.8, 7.4, 1.5 Hz, 1H), 7.14-7.08 (m, 2H), 6.99 (dt, *J* = 12.4, 1.2 Hz, 1H), 6.89 (dt, *J* = 7.8, 0.7 Hz, 1H), 5.00 (dt, *J* = 12.4, 7.8 Hz, 1H), 3.24 (s, 3H), 2.94 (d, *J* = 1.3 Hz, 1H), 2.92 (d, *J* = 1.3 Hz, 1H), 2.60 (s, 3H), 1.84 (s, 3H), 1.15 (s, 9H).

**<sup>13</sup>C NMR** (100 MHz; CDCl<sub>3</sub>): δ 176.2, 175.3, 162.4, 148.4, 143.4, 139.6, 131.0, 129.5, 128.9, 124.3, 123.2, 108.4, 107.0, 52.5, 38.7, 37.7, 27.0, 26.5, 19.2, 16.1.

**IR**: 2969, 2921, 1744, 1719, 1673, 1611, 1493, 1471, 1371, 1350, 1278, 1140, 934, 753 cm<sup>-1</sup>

**Chiral HPLC**: IA, 90:10 heptane:isopropanol, 0.8 mL/min, 254 nm, 13.33 min (minor), 30.67 (major).

**[α]<sub>D</sub><sup>24</sup>** = + 18.6° (c = 0.72, CHCl<sub>3</sub>)

**HRMS** (ESI): Calculated for C<sub>22</sub>H<sub>27</sub>N<sub>2</sub>O<sub>3</sub>S (M+H)<sup>+</sup>: 399.1737, Found 399.1737.

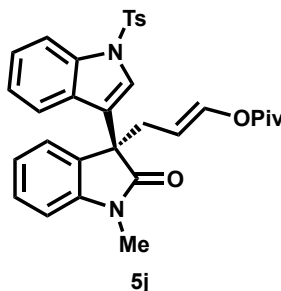

**5j**: Prepared according to the representative procedure from **4j** (41.6 mg, 0.10 mmol) in THF for 18 h. Purification *via* column chromatography (2:1 hexanes:EtOAc) afforded **5j** (45.5 mg, 82%, >19:1 linear:branched, 93% ee) as a viscous, yellow oil.

**R<sub>f</sub>** = 0.34 (2:1 hexanes:EtOAc)

**<sup>1</sup>H NMR** (400 MHz; CDCl<sub>3</sub>): δ 7.89 (dt, *J* = 8.4, 0.8 Hz, 1H), 7.78-7.76 (m, 2H), 7.50 (s, 1H), 7.37 (td, *J* = 7.7, 1.4 Hz, 1H), 7.24-7.15 (m, 5H), 7.11-7.04 (m, 2H), 7.02 (dt, *J* = 12.4, 1.2 Hz, 1H), 6.95 (d, *J* = 7.7 Hz, 1H), 5.01 (ddd, *J* = 12.4, 8.8, 6.9 Hz, 1H), 3.25 (s, 3H), 3.09-2.99 (m, 2H), 2.35 (s, 3H), 1.16 (s, 9H).

**<sup>13</sup>C NMR** (100 MHz; CDCl<sub>3</sub>): δ 176.8, 175.4, 145.2, 143.7, 139.2, 135.6, 135.2, 130.6, 130.1, 128.9, 128.7, 127.0, 124.9, 124.7, 124.6, 123.3, 123.2, 121.4, 121.0, 113.6, 109.5, 107.4, 52.5, 38.7, 34.6, 27.0, 26.6, 21.7.

**IR**: 2973, 1742, 1716, 1674, 1612, 1493, 1471, 1448, 1372, 1279, 1176, 1142, 1090, 987, 935, 749, 703, 680, 664 cm<sup>-1</sup>

**Chiral HPLC**: IC, 80:20 heptane:isopropanol, 0.8 mL/min, 254 nm, 55.46 min (major), 64.20 (minor).

$[\alpha]_D^{23} = +95.5^\circ$  ( $c = 0.61$ ,  $\text{CHCl}_3$ )

**HRMS** (ESI): Calculated for  $\text{C}_{32}\text{H}_{32}\text{N}_2\text{NaO}_5\text{S}$  ( $\text{M}+\text{Na}$ ) $^+$ : 579.1924, Found 579.1909

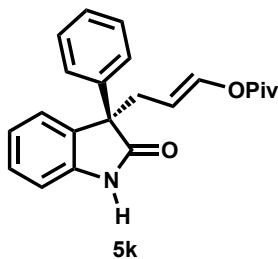

**5k**: Prepared according to the representative procedure from **4k** (21.0 mg, 0.10 mmol) in PhMe for 24 h. Purification *via* column chromatography (4:1 to 2:1 hexanes:EtOAc) afforded **5k** (33.7 mg, 96%, 13:1 linear:branched, 90% ee, *ca.* 93% purity) as a white foam.

The larger-scale synthesis of **5k** was performed with **4k** (104.6 mg, 0.50 mmol),  $\text{Pd}_2\text{dba}_3 \cdot \text{CHCl}_3$  (12.9 mg, 0.0125 mmol, 0.025 equivalent), **L2** (29.6 mg, 0.0375 mmol, 0.075 equivalent), allylidene dipivalate (193  $\mu\text{L}$ , 181 mg, 0.75 mmol, 1.5 equivalent),  $t\text{BuOH}$  (239  $\mu\text{L}$ , 185 mg, 2.5 mmol, 5 equivalents) in PhMe (1.25 mL) for 24 h. It was then poured into a mixture of  $\text{Et}_2\text{O}$  (50 mL) and saturated aqueous  $\text{NaHCO}_3$  (50 mL). The phases were separated, and the aqueous phase was extracted with  $\text{Et}_2\text{O}$  (25 mL). The pooled organics were dried over  $\text{MgSO}_4$ , filtered, and concentrated *in vacuo*. The residue was purified by column chromatography (2:1 hexanes:EtOAc), affording **5k** (159.3 mg, 91%, 13:1 linear:branched, 89% ee) as a viscous yellow oil.

$R_f = 0.20$  (4:1 hexanes:EtOAc)

$^1\text{H NMR}$  (500 MHz;  $\text{CDCl}_3$ ):  $\delta$  7.73 (s, 1H), 7.39-7.27 (m, 6H), 7.23-7.21 (m, 1H), 7.11 (td,  $J = 7.6, 1.0$  Hz, 1H), 7.06 (dt,  $J = 12.4, 1.3$  Hz, 1H), 6.95 (d,  $J = 7.8$  Hz, 1H), 5.09 (ddd,  $J = 12.4, 8.7, 6.9$  Hz, 1H), 3.03-2.94 (m, 2H), 1.15 (s, 9H).

$^{13}\text{C NMR}$  (150 MHz;  $\text{CDCl}_3$ ):  $\delta$  180.2, 175.5, 141.0, 139.1, 139.0, 132.1, 128.8, 128.5, 127.7, 127.2, 125.6, 122.8, 110.3, 108.1, 57.0, 38.7, 35.7, 27.0

**IR**: 3238, 2974, 2933, 1742, 1711, 1620, 1473, 1279, 1226, 1143, 934, 752, 733, 697, 660  $\text{cm}^{-1}$

**Chiral HPLC**: IB, 80:20 heptane:isopropanol, 0.8 mL/min, 254 nm, 6.16 (minor), 12.05 (major).

$[\alpha]_D^{24} = +71.2^\circ$  ( $c = 0.53$ ,  $\text{CHCl}_3$ )

**HRMS** (ESI): Calculated for  $\text{C}_{22}\text{H}_{23}\text{NNaO}_3$  ( $\text{M}+\text{Na}$ ) $^+$ : 372.1570, Found 372.1569.

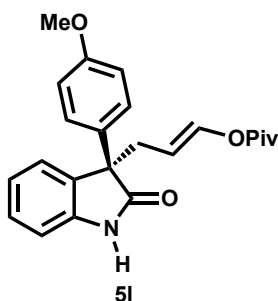

**5l**: Prepared according to the representative procedure from **4l** (24.0 mg, 0.10 mmol) in PhMe for 48 h. Purification *via* column chromatography (4:1 to 2:1 hexanes:EtOAc) afforded **5l** (33.5 mg, 88%, 11:1 linear:branched, 84% ee, *ca.* 92% purity) as a white foam.

$R_f$  = 0.40 (2:1 hexanes:EtOAc)

$^1\text{H NMR}$  (500 MHz;  $\text{CDCl}_3$ ):  $\delta$  7.98 (s, 1H), 7.30-7.27 (m, 3H), 7.20 (d,  $J$  = 7.4 Hz, 1H), 7.10 (td,  $J$  = 7.5, 1.0 Hz, 1H), 7.05 (dt,  $J$  = 12.4, 1.2 Hz, 1H), 6.94 (d,  $J$  = 7.8 Hz, 1H), 6.87-6.84 (m, 2H), 5.09 (ddd,  $J$  = 12.4, 8.8, 6.8 Hz, 1H), 3.77 (s, 3H), 2.99-2.90 (m, 2H), 1.15 (s, 9H).

$^{13}\text{C NMR}$  (125 MHz;  $\text{CDCl}_3$ ):  $\delta$  180.7, 175.5, 159.0, 141.0, 138.9, 132.3, 131.1, 128.4, 128.3, 125.5, 122.7, 114.1, 110.3, 108.2, 56.3, 55.4, 38.7, 35.7, 27.0

**IR**: 3216, 2973, 1711, 1619, 1511, 1472, 1397, 1367, 1280, 1253, 1184, 1143, 1035, 935, 826, 797, 755  $\text{cm}^{-1}$

**Chiral HPLC**: IC, 80:20 heptane:isopropanol, 0.8 mL/min, 254 nm, 12.67 (minor), 22.78 (major).

$[\alpha]_D^{24}$  = + 81.0° ( $c$  = 0.46,  $\text{CHCl}_3$ )

**HRMS** (ESI): Calculated for  $\text{C}_{23}\text{H}_{25}\text{NNaO}_4$  ( $\text{M}+\text{Na}$ ) $^+$ : 402.1676, Found 402.1672.

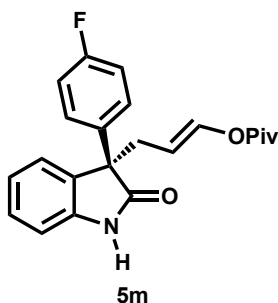

**5m**: Prepared according to the representative procedure from **4m** (22.8 mg, 0.10 mmol) in PhMe for 24 h. Purification *via* column chromatography (4:1 to 2:1 hexanes:EtOAc) afforded **5m** (35.7 mg, 97%, 17:1 linear:branched, 89% ee, *ca.* 93% purity) as a white foam.

$R_f$  = 0.44 (2:1 hexanes:EtOAc)

**<sup>1</sup>H NMR** (500 MHz; CDCl<sub>3</sub>): δ 8.39 (s, 1H), 7.37-7.33 (m, 2H), 7.29 (td, *J* = 7.7, 1.3 Hz, 1H), 7.20 (d, *J* = 7.5 Hz, 1H), 7.11 (td, *J* = 7.5, 1.0 Hz, 1H), 7.06 (dt, *J* = 12.4, 1.2 Hz, 1H), 7.02-6.98 (m, 2H), 6.96 (ddd, *J* = 7.8, 0.9, 0.6 Hz, 1H), 5.07 (ddd, *J* = 12.4, 8.8, 6.7 Hz, 1H), 2.97 (ddd, *J* = 14.0, 6.8, 1.5 Hz, 1H), 2.92 (ddd, *J* = 14.0, 8.9, 1.0 Hz, 1H), 1.15 (s, 9H).

**<sup>13</sup>C NMR** (125 MHz; CDCl<sub>3</sub>): δ 180.2, 175.5, 140.9, 139.1, 131.8, 129.0, 128.9, 128.7, 125.5, 122.9, 115.7, 115.5, 110.5, 107.9, 56.4, 38.7, 36.0, 27.0

**IR**: 3209, 2975, 1712, 1619, 1509, 1472, 1398, 1327, 1279, 1231, 1142, 934, 814, 753 cm<sup>-1</sup>

**Chiral HPLC**: IB, 80:20 heptane:isopropanol, 0.8 mL/min, 254 nm, 5.82 (minor), 14.20 (major).

**[α]<sub>D</sub><sup>24</sup>** = + 83.7° (c = 0.31, CHCl<sub>3</sub>)

**HRMS** (ESI): Calculated for C<sub>22</sub>H<sub>22</sub>FNNaO<sub>3</sub> (M+Na)<sup>+</sup>: 390.1476, Found 309.1479.

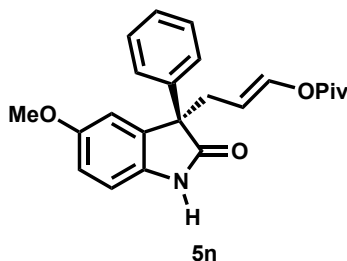

**5n**: Prepared according to the representative procedure from **4n** (24.0 mg, 0.10 mmol) in PhMe for 72 h. Purification *via* column chromatography (4:1 to 2:1 hexanes:EtOAc) afforded **5n** (28.5 mg, 75%, 9:1 linear:branched, 87% ee, *ca.* 92% purity) as a viscous, light yellow oil.

**R<sub>f</sub>** = 0.34 (2:1 hexanes:EtOAc)

**<sup>1</sup>H NMR** (400 MHz; CDCl<sub>3</sub>): δ 8.24 (s, 1H), 7.38-7.28 (m, 5H), 7.09 (dt, *J* = 12.4, 1.2 Hz, 1H), 6.88-6.79 (m, 3H), 5.11 (ddd, *J* = 12.4, 8.9, 6.6 Hz, 1H), 3.77 (s, 3H), 3.04-2.92 (m, 2H), 1.15 (s, 9H).

**<sup>13</sup>C NMR** (125 MHz; CDCl<sub>3</sub>): δ 180.2, 175.5, 155.9, 139.1, 139.0, 134.4, 133.5, 128.8, 127.7, 127.1, 113.3, 112.3, 110.7, 108.1, 57.4, 55.9, 38.7, 35.5, 27.0

**IR**: 3230, 2972, 1708, 1602, 1488, 1278, 1205, 1142, 1033, 934, 810, 734, 697 cm<sup>-1</sup>

**Chiral HPLC**: IC, 95:5 heptane:isopropanol, 0.8 mL/min, 254 nm, 36.27 (minor), 57.11 (major).

**[α]<sub>D</sub><sup>24</sup>** = + 61.6° (c = 0.40, CHCl<sub>3</sub>)

**HRMS** (ESI): Calculated for C<sub>23</sub>H<sub>25</sub>NNaO<sub>4</sub> (M+Na)<sup>+</sup>: 402.1676, Found 402.1670.

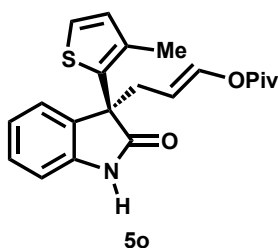

**5o**: Prepared according to the representative procedure from **4o** (23.0 mg, 0.10 mmol) in PhMe for 48 h. Purification *via* column chromatography (2:1 hexanes:EtOAc) afforded **5o** (34.4 mg, 93%, 14:1 linear:branched, 92% ee, *ca.* 97% purity) as a viscous, light yellow oil.

$R_f$  = 0.38 (2:1 hexanes:EtOAc)

$^1\text{H NMR}$  (400 MHz;  $\text{CDCl}_3$ ):  $\delta$  7.72 (s, 1H), 7.25 (td,  $J$  = 7.6, 1.5 Hz, 1H), 7.12-7.03 (m, 4H), 6.91 (dt,  $J$  = 7.8, 0.8 Hz, 1H), 6.77 (d,  $J$  = 5.2 Hz, 1H), 5.07 (ddd,  $J$  = 12.4, 8.7, 6.9 Hz, 1H), 3.11 (ddd,  $J$  = 13.4, 8.7, 1.1 Hz, 1H), 3.03 (ddd,  $J$  = 13.4, 6.9, 1.5 Hz, 1H), 1.76 (s, 3H), 1.15 (s, 9H).

$^{13}\text{C NMR}$  (125 MHz;  $\text{CDCl}_3$ ):  $\delta$  178.9, 175.4, 140.5, 139.5, 135.4, 134.9, 132.1, 132.0, 128.6, 124.6, 123.1, 122.4, 110.0, 107.0, 54.4, 38.7, 36.9, 27.0, 14.4.

**IR**: 3223, 2974, 1714, 1618, 1472, 1397, 1279, 1225, 1141, 934, 733, 674  $\text{cm}^{-1}$

**Chiral HPLC**: IB, 95:5 heptane:isopropanol, 0.4 mL/min, 254 nm, 18.07 (minor), 30.20 (major).

$[\alpha]_D^{22}$  = - 1.29° ( $c$  = 0.75,  $\text{CHCl}_3$ )

**HRMS** (ESI): Calculated for  $\text{C}_{21}\text{H}_{23}\text{NNaO}_3\text{S}$  ( $\text{M}+\text{Na}$ ) $^+$ : 392.1291, Found 392.1279

#### f) Synthesis of Compounds 6-10

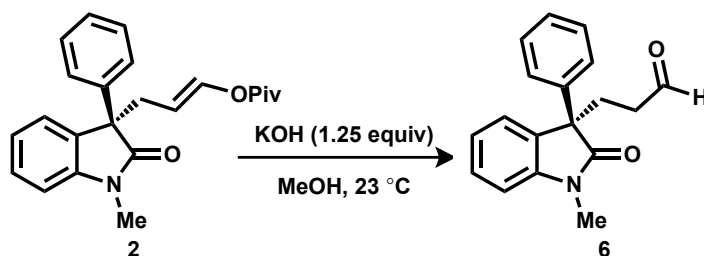

**Synthesis of 6 (from 2)**: To a solution of enol pivalate **2** (31.0 mg, 0.085 mmol, 1 equivalent) in MeOH (0.42 mL) in a 2-dram vial was added a solution of KOH (6.0 mg, 0.11 mmol, 1.25 equivalents) in MeOH (0.43 mL) dropwise. The reaction mixture was stirred at room temperature for 3 h, at which point it was diluted with  $\text{Et}_2\text{O}$  (10 mL) and poured into pH 7 phosphate buffer (5 mL). The phases were separated, and the aqueous phase was extracted with  $\text{Et}_2\text{O}$  (5 mL). The pooled organics were dried over  $\text{MgSO}_4$ , filtered, and concentrated. The

residue was purified *via* column chromatography (2:1 hexanes:EtOAc) to afford **6** (19.9 mg, 84%) as a cloudy, viscous oil.

**Synthesis of 6 (one-pot, from 1):** For the one-pot synthesis, the Pd-AAA was carried out according to the representative procedure, using **1** (22.3 mg, 0.10 mmol, 1 equivalent). After 24 h, TLC indicated full consumption of **1**. The reaction vial was opened, and the mixture was diluted with a solution of KOH (18.2 mg, 0.32 mmol, 3.25 equivalents) in MeOH (0.75 mL). The reaction mixture was stirred for 2 h at room temperature, at which point it was poured into pH 7 buffer (5 mL). The phases were separated, and the aqueous phase was extracted with Et<sub>2</sub>O (3 x 5 mL). The pooled organics were dried over MgSO<sub>4</sub>, filtered, and concentrated. The residue was purified *via* column chromatography (2:1 hexanes:EtOAc) to afford **6** (19.6 mg, 70%).

$R_f$  = 0.16 (2:1 hexanes:EtOAc)

<sup>1</sup>H NMR (500 MHz; CDCl<sub>3</sub>): δ 9.62 (t, *J* = 1.3 Hz, 1H), 7.38-7.29 (m, 5H), 7.27-7.22 (m, 2H), 7.12 (td, *J* = 7.5, 1.0 Hz, 1H), 6.93 (d, *J* = 7.8 Hz, 1H), 3.25 (s, 3H), 2.73 (ddd, *J* = 13.9, 10.5, 5.2 Hz, 1H), 2.53 (ddd, *J* = 13.9, 10.7, 5.0 Hz, 1H), 2.36-2.29 (m, 1H), 2.17-2.10 (m, 1H).

<sup>13</sup>C NMR (125 MHz; CDCl<sub>3</sub>): δ 200.9, 178.1, 143.8, 139.4, 131.5, 128.8(2), 128.7(9), 127.7, 126.9, 124.8, 123.1, 108.7, 55.6, 39.5, 29.9, 26.6.

IR: 2918, 2849, 1710, 1611, 1493, 1470, 1372, 1347, 754, 697 cm<sup>-1</sup>

$[\alpha]_D^{23} = +87.2^\circ$  (c = 0.99, CHCl<sub>3</sub>)

HRMS (ESI): Calculated for C<sub>18</sub>H<sub>17</sub>NNaO<sub>2</sub> (M+Na)<sup>+</sup>: 302.1151, Found 302.1146

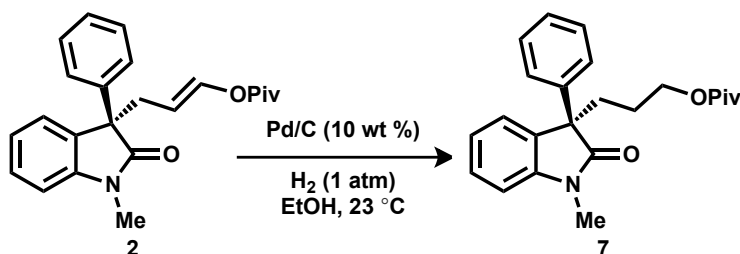

**Synthesis of 7:** To a solution of enol pivalate **2** (41.9 mg, 0.115 mmol, 1 equivalent) in EtOH (0.58 mL) in a 2-dram vial was added Pd/C (4.2 mg, 10 weight %, 3 weight % on activated carbon). The solution was sparged with H<sub>2</sub> (balloon, *ca.* 2-3 minutes) then kept under H<sub>2</sub> (balloon) and stirred vigorously for 18 h. The reaction mixture was then filtered through Celite®, eluting with Et<sub>2</sub>O (10 mL). The solution was concentrated and the residue was purified *via*

column chromatography (6:1 hexanes:EtOAc) to afford **7** (34.4 mg, 82%) as a clear, colorless oil.

$R_f = 0.21$  (4:1 hexanes:EtOAc)

$^1\text{H NMR}$  (600 MHz;  $\text{CDCl}_3$ ):  $\delta$  7.37-7.33 (m, 3H), 7.31-7.28 (m, 2H), 7.25-7.22 (m, 2H), 7.13 (td,  $J = 7.5, 0.9$  Hz, 1H), 6.92 (d,  $J = 7.8$  Hz, 1H), 4.01-3.93 (m, 2H), 3.23 (s, 3H), 2.43 (ddd,  $J = 13.2, 12.3, 4.7$  Hz, 1H), 2.28 (td,  $J = 12.9, 4.0$  Hz, 1H), 1.52-1.43 (m, 1H), 1.29-1.23 (m, 1H), 1.17 (s, 9H).

$^{13}\text{C NMR}$  (100 MHz;  $\text{CDCl}_3$ ):  $\delta$  178.6, 178.3, 144.0, 140.0, 131.9, 128.7, 128.5, 127.5, 127.0, 124.8, 122.8, 108.5, 64.0, 56.3, 38.8, 34.5, 27.3, 26.5, 24.2

$\text{IR}$ : 2962, 2360, 1718, 1612, 1493, 1471, 1372, 1346, 1284, 1157, 1037, 751  $\text{cm}^{-1}$

$[\alpha]_D^{23} = +100.3^\circ$  ( $c = 0.32, \text{CHCl}_3$ )

$\text{HRMS}$  (ESI): Calculated for  $\text{C}_{23}\text{H}_{27}\text{NNaO}_3$  ( $\text{M}+\text{Na}$ ) $^+$ : 388.1883, Found 388.1877

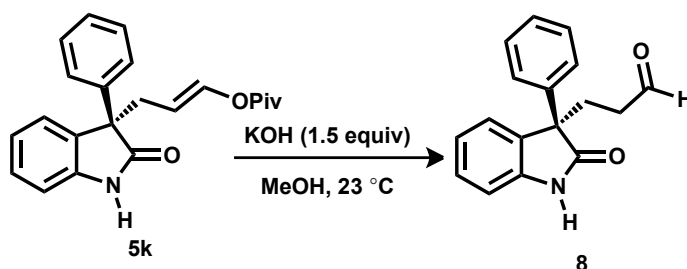

**Synthesis of 8:** To a solution of enol pivalate **5k** (104 mg, 0.30 mmol, 1 equivalent) in MeOH (2.0 mL) in a 2-dram vial was added a solution of KOH (25.1 mg, 0.45 mmol, 1.5 equivalents) in MeOH (1.0 mL) dropwise. The reaction mixture was stirred at room temperature for 1 h, at which point it was diluted with EtOAc (10 mL) and poured into pH 7 phosphate buffer (5 mL). The phases were separated, and the aqueous phase was extracted with EtOAc (2 x 5 mL). The pooled organics were dried over  $\text{MgSO}_4$ , filtered, and concentrated. The residue was purified by column chromatography (1:1 hexanes:EtOAc) to afford **8** (65.7 mg, 83%) as a viscous, light yellow oil.

$R_f = 0.27$  (1:1 hexanes:EtOAc)

$^1\text{H NMR}$  (500 MHz;  $\text{CDCl}_3$ ):  $\delta$  9.65 (t,  $J = 1.2$  Hz, 1H), 7.80 (s, 1H), 7.38-7.27 (m, 6H), 7.19 (d,  $J = 7.6$  Hz, 1H), 7.10 (t,  $J = 7.4$  Hz, 1H), 6.96 (d,  $J = 7.7$  Hz, 1H), 2.74 (ddd,  $J = 13.8, 10.6, 5.1$  Hz, 1H), 2.59-2.53 (m, 1H), 2.47-2.40 (m, 1H), 2.21 (dddd,  $J = 17.8, 10.6, 4.8, 1.3$  Hz, 1H).

$^{13}\text{C NMR}$  (100 MHz;  $\text{CDCl}_3$ ):  $\delta$  201.0, 180.6, 141.0, 139.3, 132.2, 128.9, 128.8, 127.8, 126.9, 125.0, 123.1, 110.5, 56.1, 39.4, 29.5.



IR: 3241, 2920, 1716, 1618, 1471, 1445, 1391, 1329, 1213, 1108, 753, 697  $\text{cm}^{-1}$

$[\alpha]_{\text{D}}^{23} = +69.1^{\circ}$  ( $c = 1.38$ ,  $\text{CHCl}_3$ )

HRMS (ESI): Calculated for  $\text{C}_{17}\text{H}_{15}\text{NNaO}_2$  ( $\text{M}+\text{Na}$ ) $^{+}$ : 288.0995, Found 288.0990

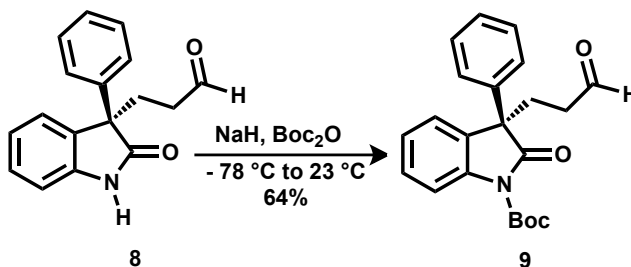

**Synthesis of 9:** To a solution of **8** (4.9 mg, 0.018 mmol, 1 equivalent) in THF (0.38 mL) in a 2-dram vial at  $-78^{\circ}\text{C}$  (dry ice / isopropanol bath) was added NaH (0.8 mg of a 60% dispersion in mineral oil, 0.020 mmol, 1.1 equivalents). The reaction mixture was stirred at this temperature for 20 min, then  $\text{Boc}_2\text{O}$  (4.0 mg, 0.018 mmol, 1 equivalent) was added. The cooling bath was removed and the reaction mixture was allowed to warm to room temperature. After 30 min, the reaction mixture was diluted with pH 7 buffer (3 mL) and  $\text{Et}_2\text{O}$  (3 mL). The phases were separated, and the aqueous phase was extracted with  $\text{Et}_2\text{O}$  (2 x 3 mL). The pooled organics were dried over  $\text{MgSO}_4$ , filtered, and concentrated. The residue was purified by column chromatography (2:1 hexanes:EtOAc) to afford **9** (4.3 mg, 64%) as a light yellow film.

$^1\text{H NMR}$  (400 MHz;  $\text{CDCl}_3$ ):  $\delta$  9.64 (t,  $J = 1.1$  Hz, 1H), 7.95 (ddd,  $J = 8.2, 1.0, 0.6$  Hz, 1H), 7.39 (ddd,  $J = 8.2, 7.2, 1.8$  Hz, 1H), 7.33-7.29 (m, 5H), 7.23 (dd,  $J = 7.2, 1.0$  Hz, 1H), 7.20 (ddd,  $J = 7.5, 1.8, 0.6$  Hz, 1H), 2.81 (ddd,  $J = 13.7, 11.0, 4.7$  Hz, 1H), 2.52 (ddd,  $J = 13.7, 11.2, 4.4$  Hz, 1H), 2.40 (dddd,  $J = 17.6, 11.3, 4.7, 1.1$  Hz, 1H), 2.15 (dddd,  $J = 17.7, 11.0, 4.4, 1.2$  Hz, 1H), 1.63 (s, 9H).

$[\alpha]_{\text{D}}^{23} = +49.5^{\circ}$  ( $c = 0.43$ ,  $\text{CHCl}_3$ ) (Lit =  $-63.67^{\circ}$  ( $c = 1.00$ ,  $\text{CHCl}_3$ ))

*These data match that reported for the antipode of 9.*<sup>12</sup>

<sup>12</sup> R. He, C. Ding, K. Maruoka, *Angew. Chem.* **2009**, *121*, 4629; *Angew. Chem. Int. Ed.* **2009**, *48*, 4559.

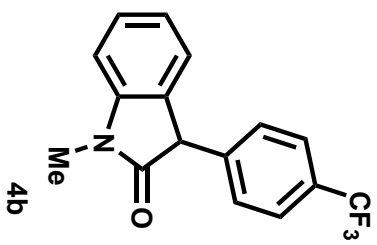

- 7.605
- 7.578
- 7.400
- 7.397
- 7.395
- 7.392
- 7.371
- 7.368
- 7.353
- 7.352
- 7.345
- 7.342
- 7.326
- 7.325
- 7.173
- 7.170
- 7.168
- 7.153
- 7.148
- 7.120
- 7.117
- 7.096
- 7.092
- 7.071
- 7.068
- 6.943
- 6.917

3.264

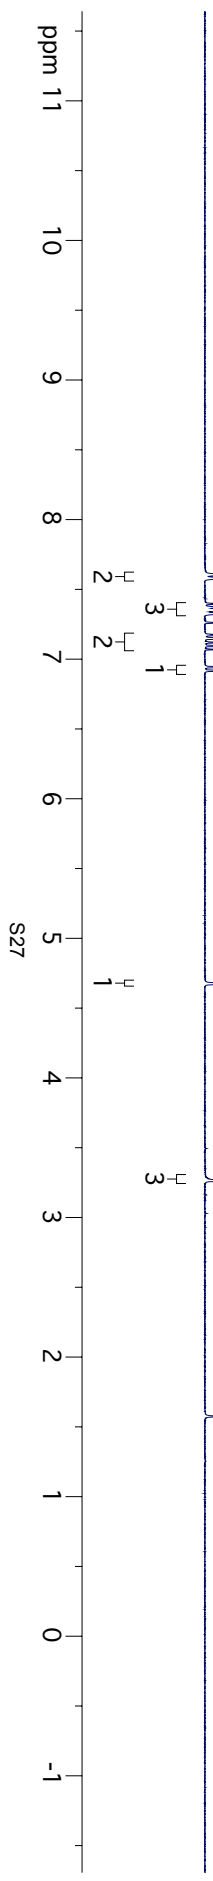

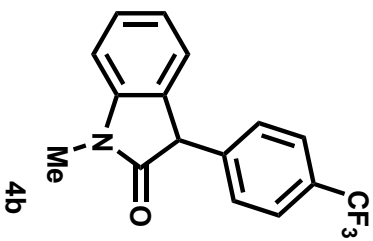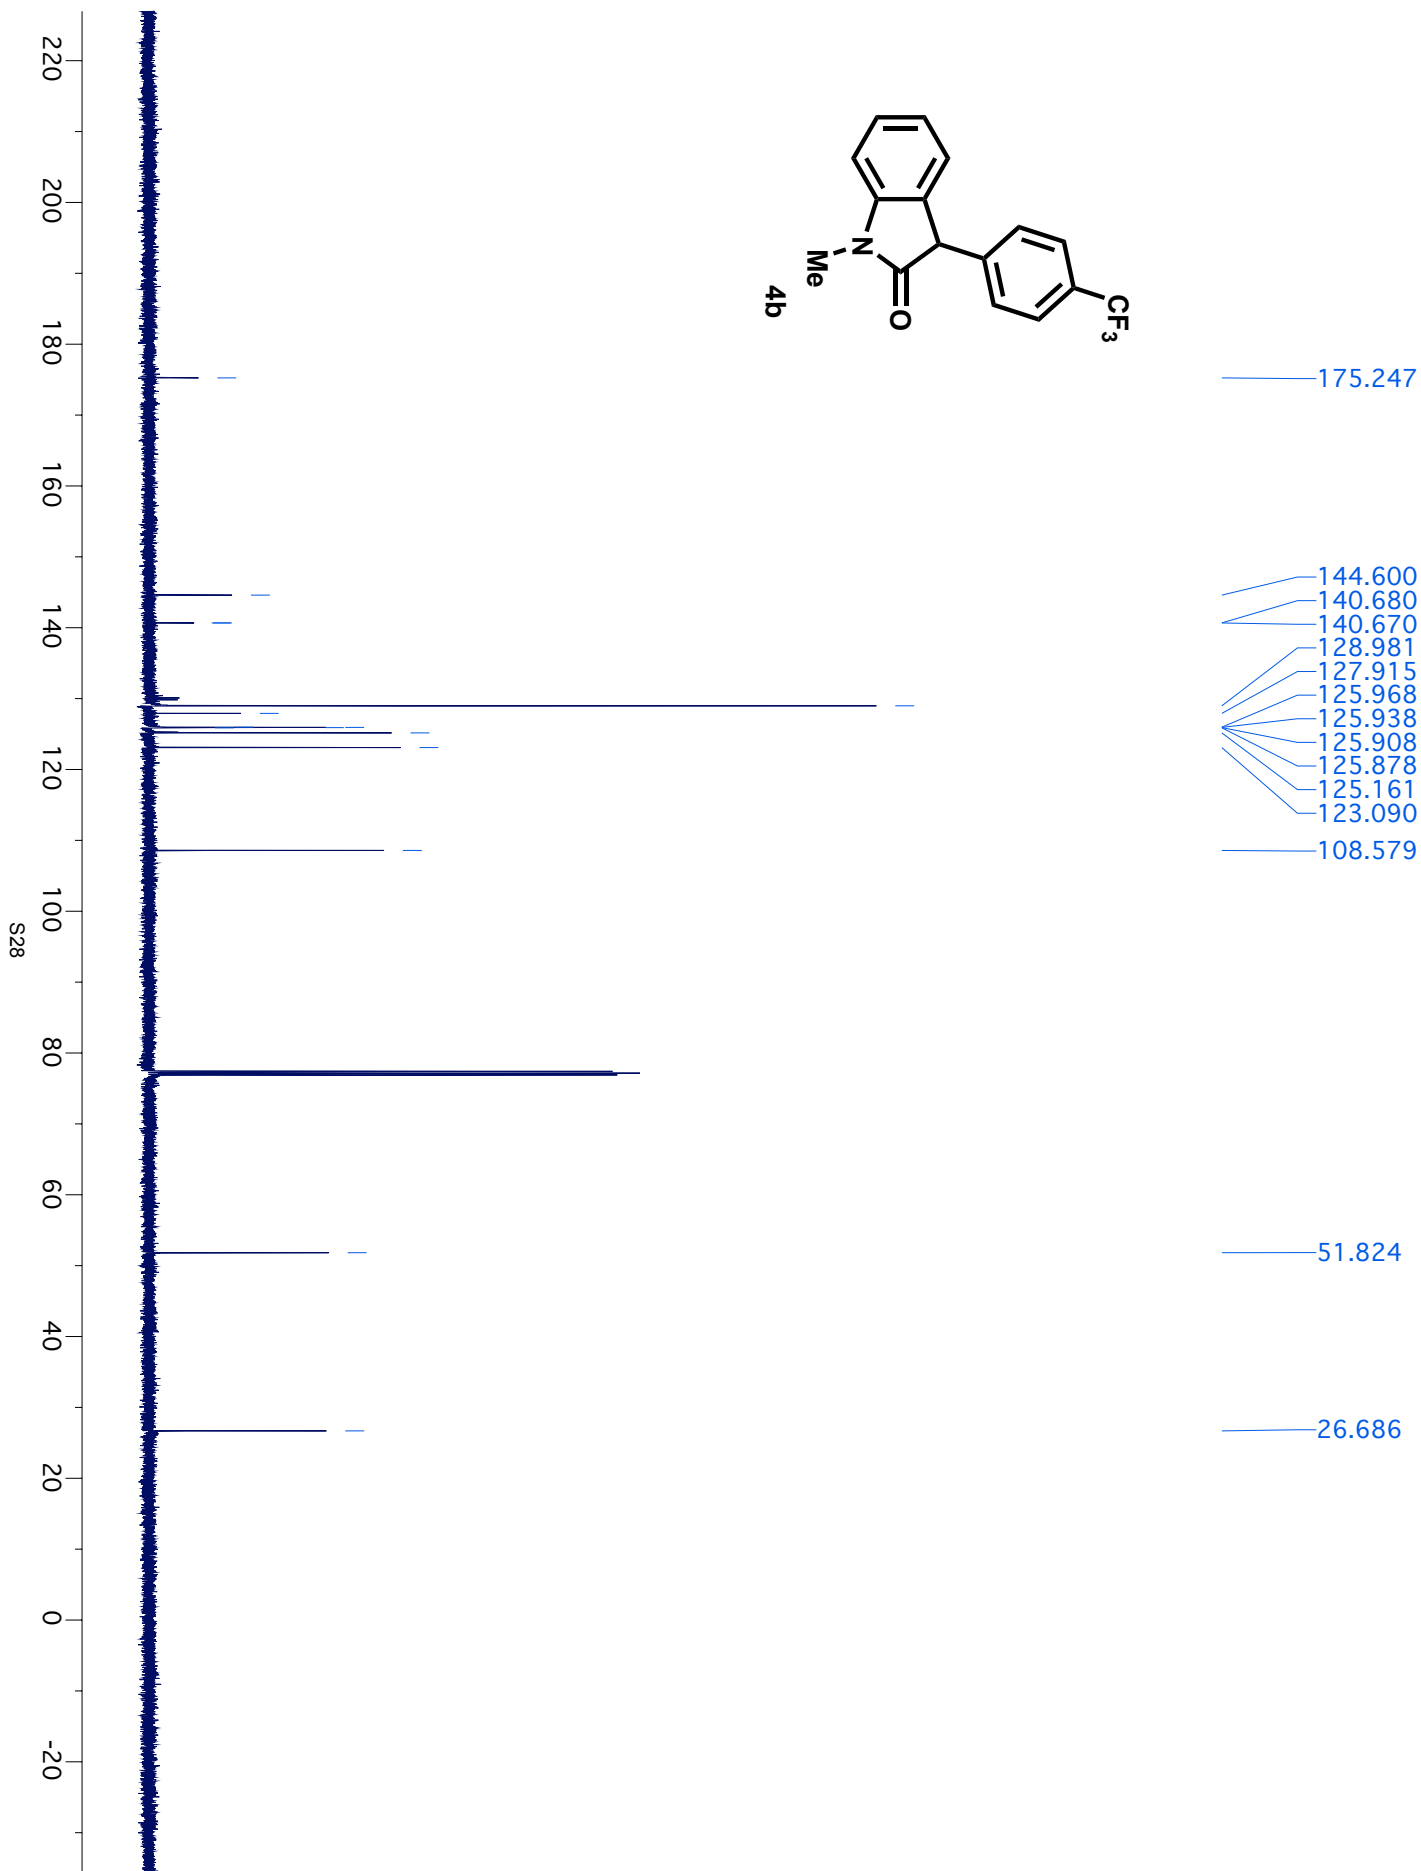

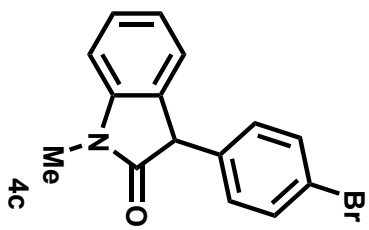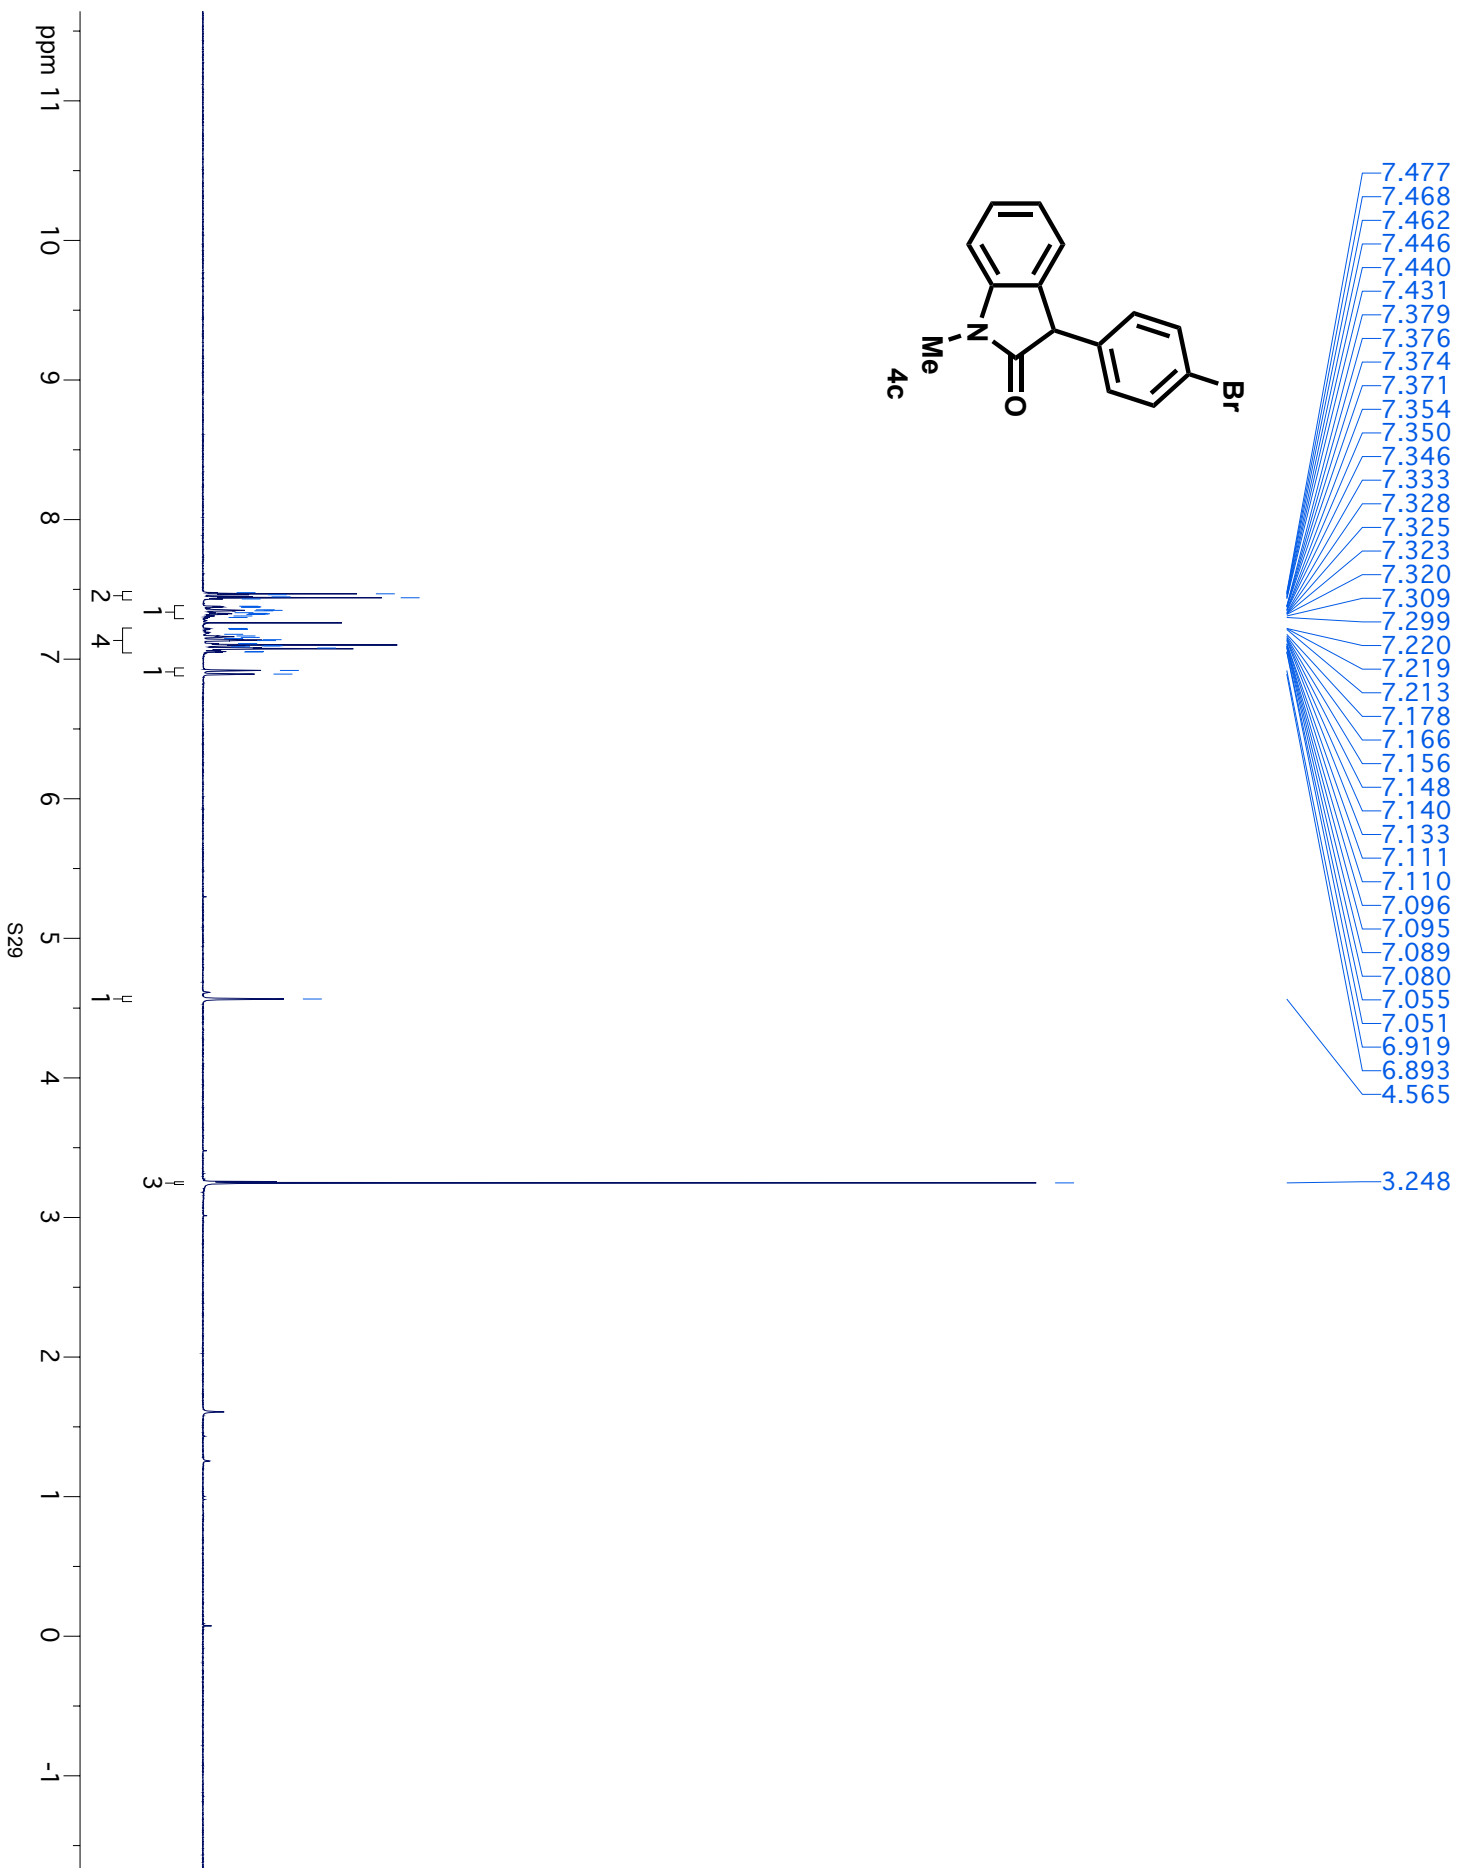

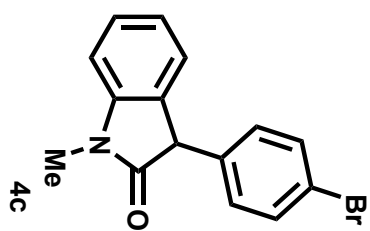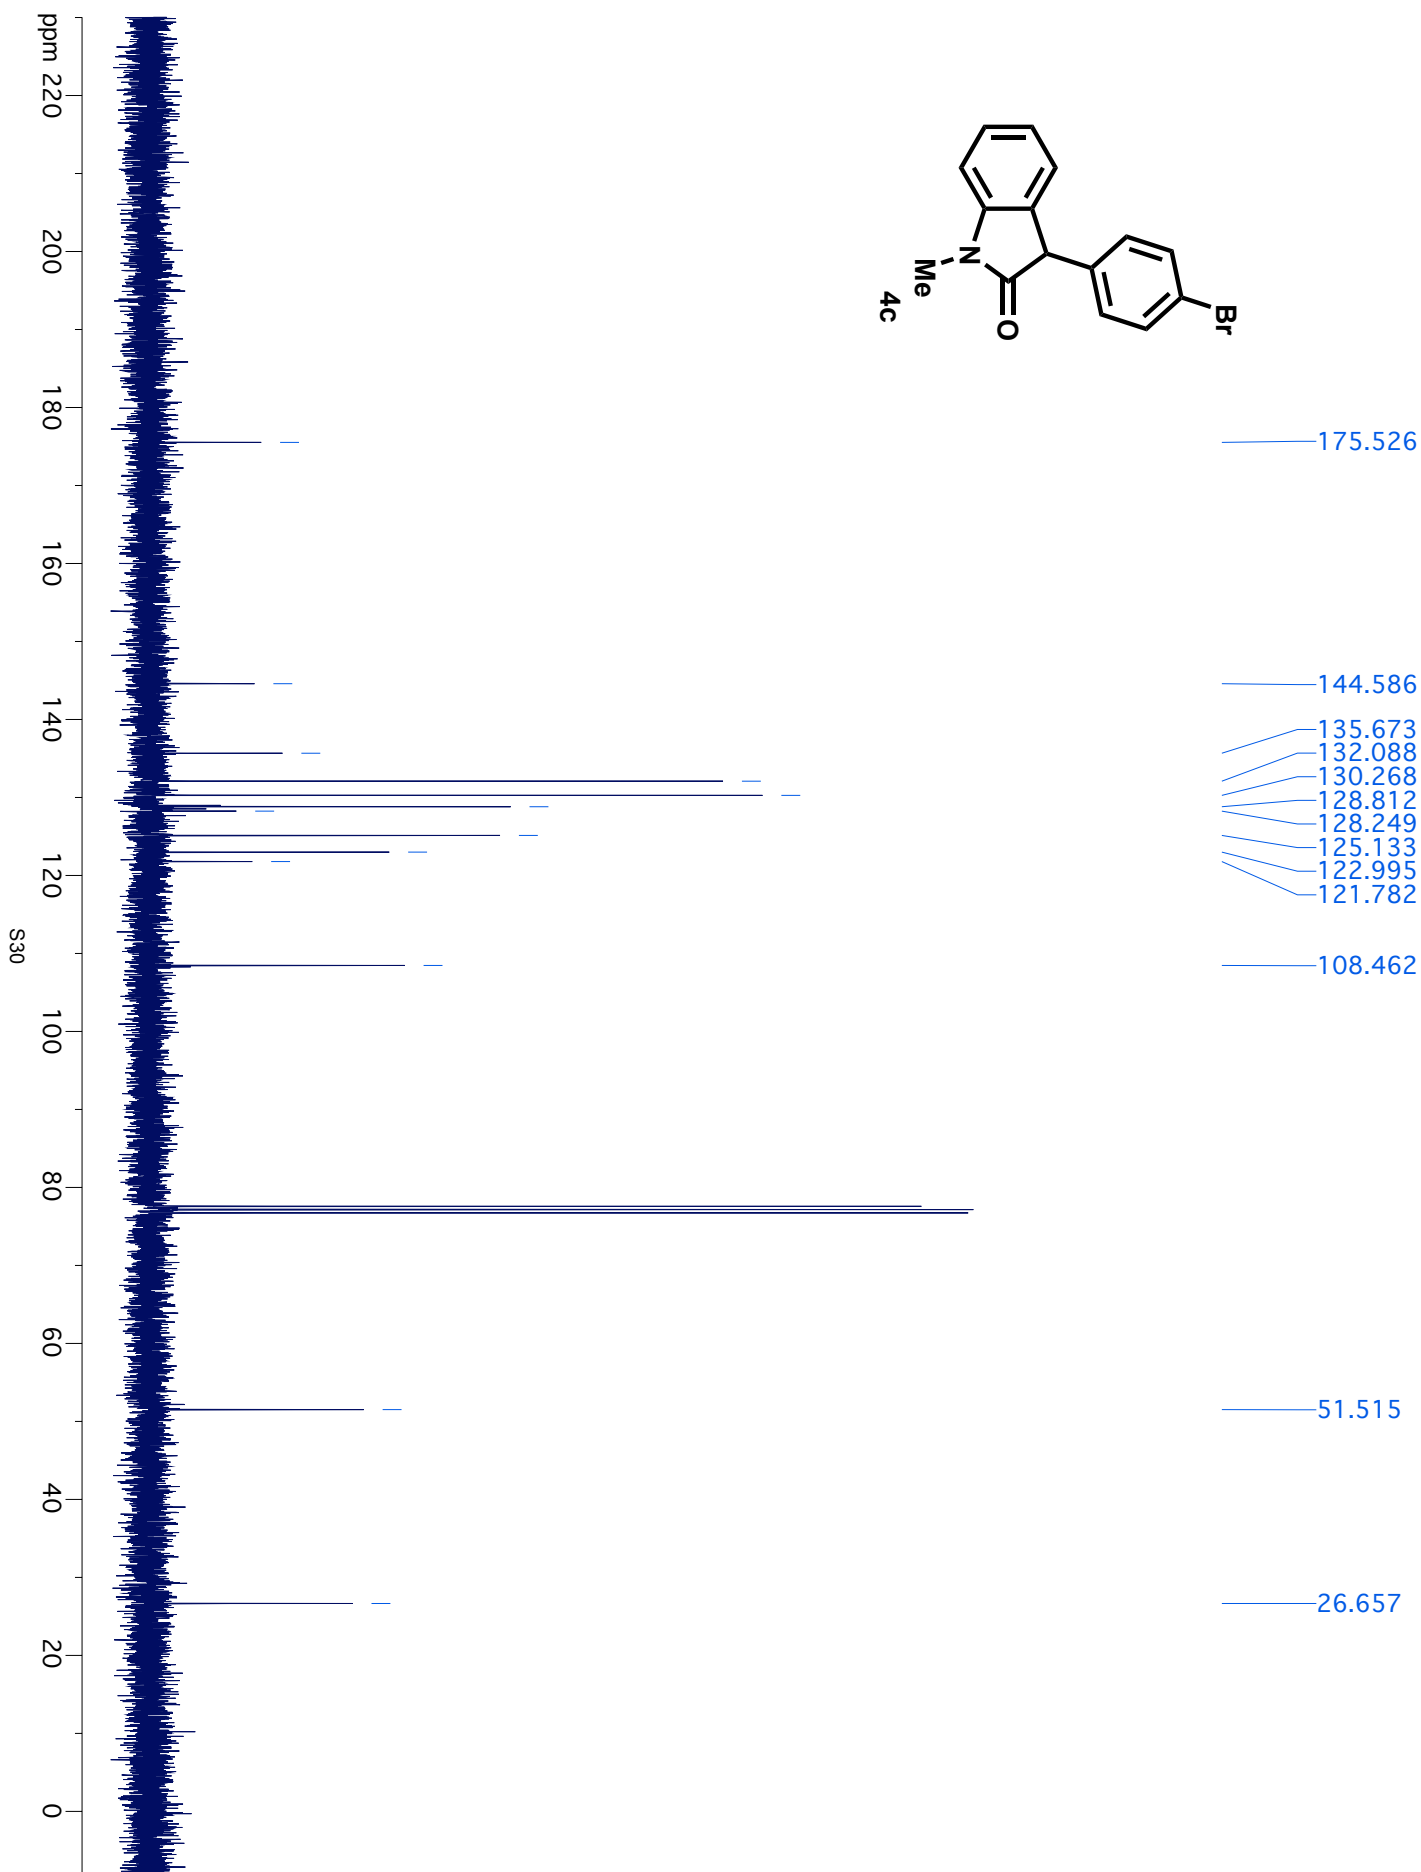

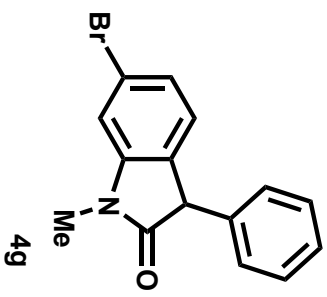

- 7.367
- 7.352
- 7.337
- 7.319
- 7.312
- 7.303
- 7.289
- 7.286
- 7.218
- 7.212
- 7.192
- 7.191
- 7.186
- 7.181
- 7.174
- 7.167
- 7.166
- 7.161
- 7.156
- 7.054
- 7.048
- 7.037
- 7.033
- 7.011
- 7.008
- 7.007
- 4.550
- 3.234

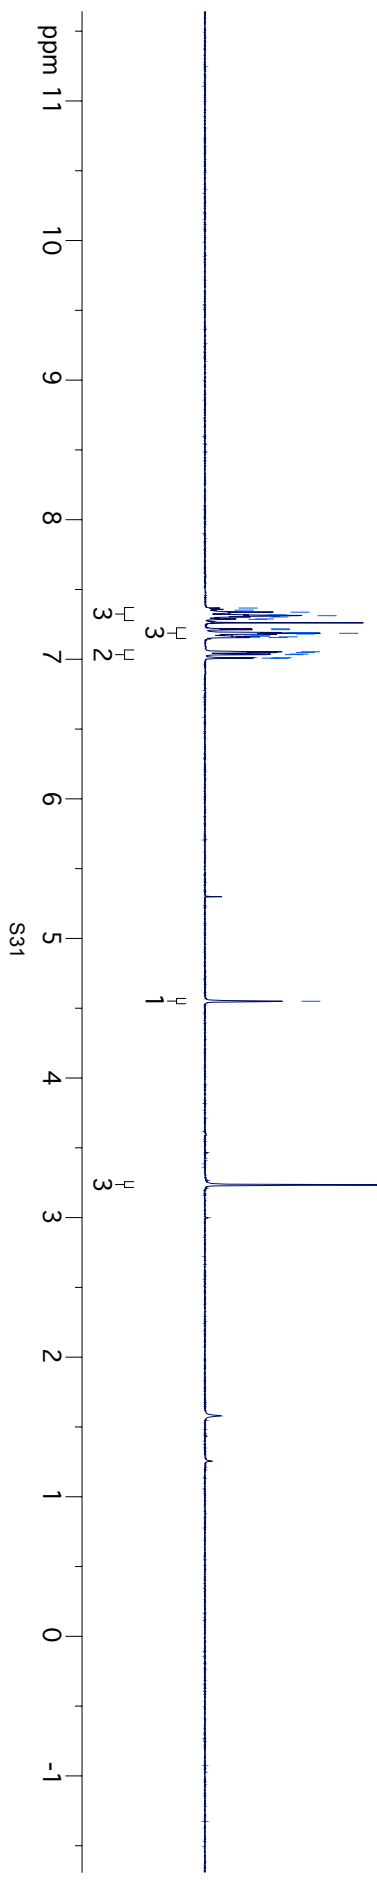

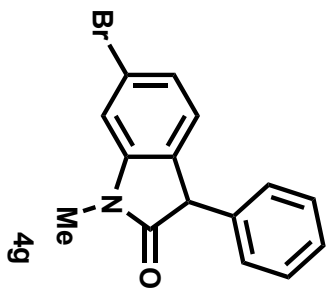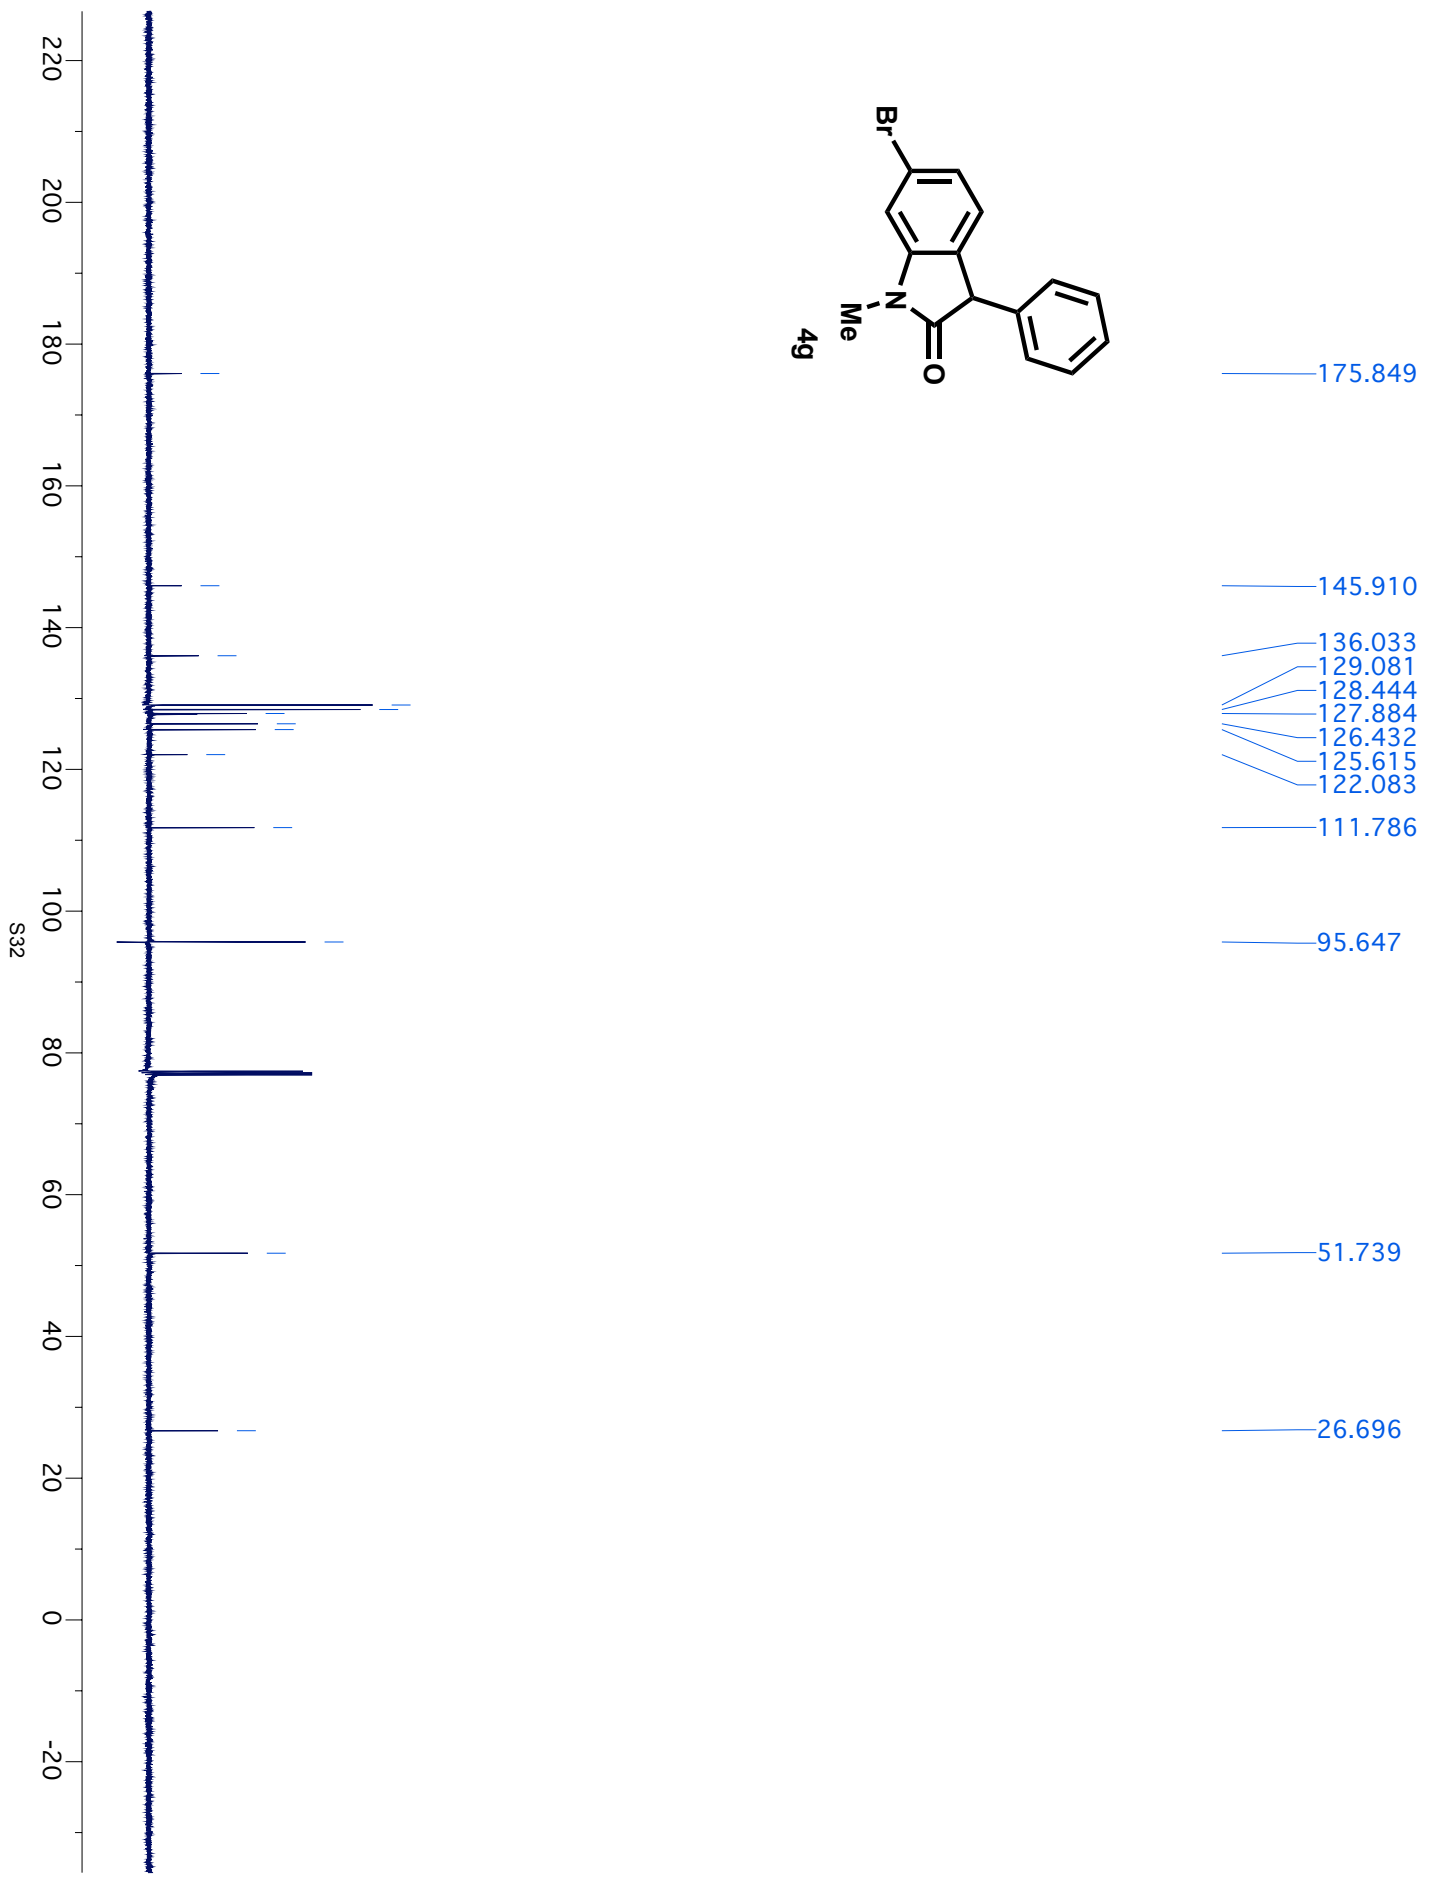

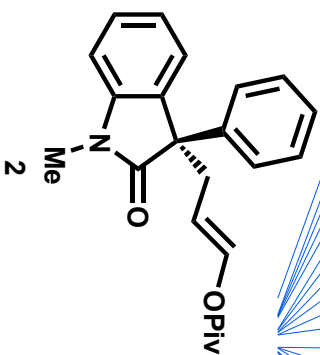

- 7.392
- 7.267
- 7.260
- 7.253
- 7.244
- 7.154
- 7.151
- 7.135
- 7.132
- 7.116
- 7.114
- 7.021
- 7.018
- 7.015
- 6.990
- 6.987
- 6.984
- 6.920
- 6.901
- 5.087
- 5.070
- 5.065
- 5.056
- 5.048
- 5.039
- 5.034
- 5.017
- 3.211
- 3.045
- 3.041
- 3.028
- 3.024
- 3.009
- 3.005
- 2.993
- 2.989
- 2.932
- 2.930
- 2.909
- 2.907
- 2.897
- 2.894
- 2.874
- 2.872
- 1.153

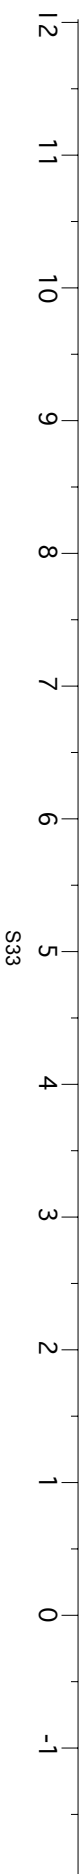



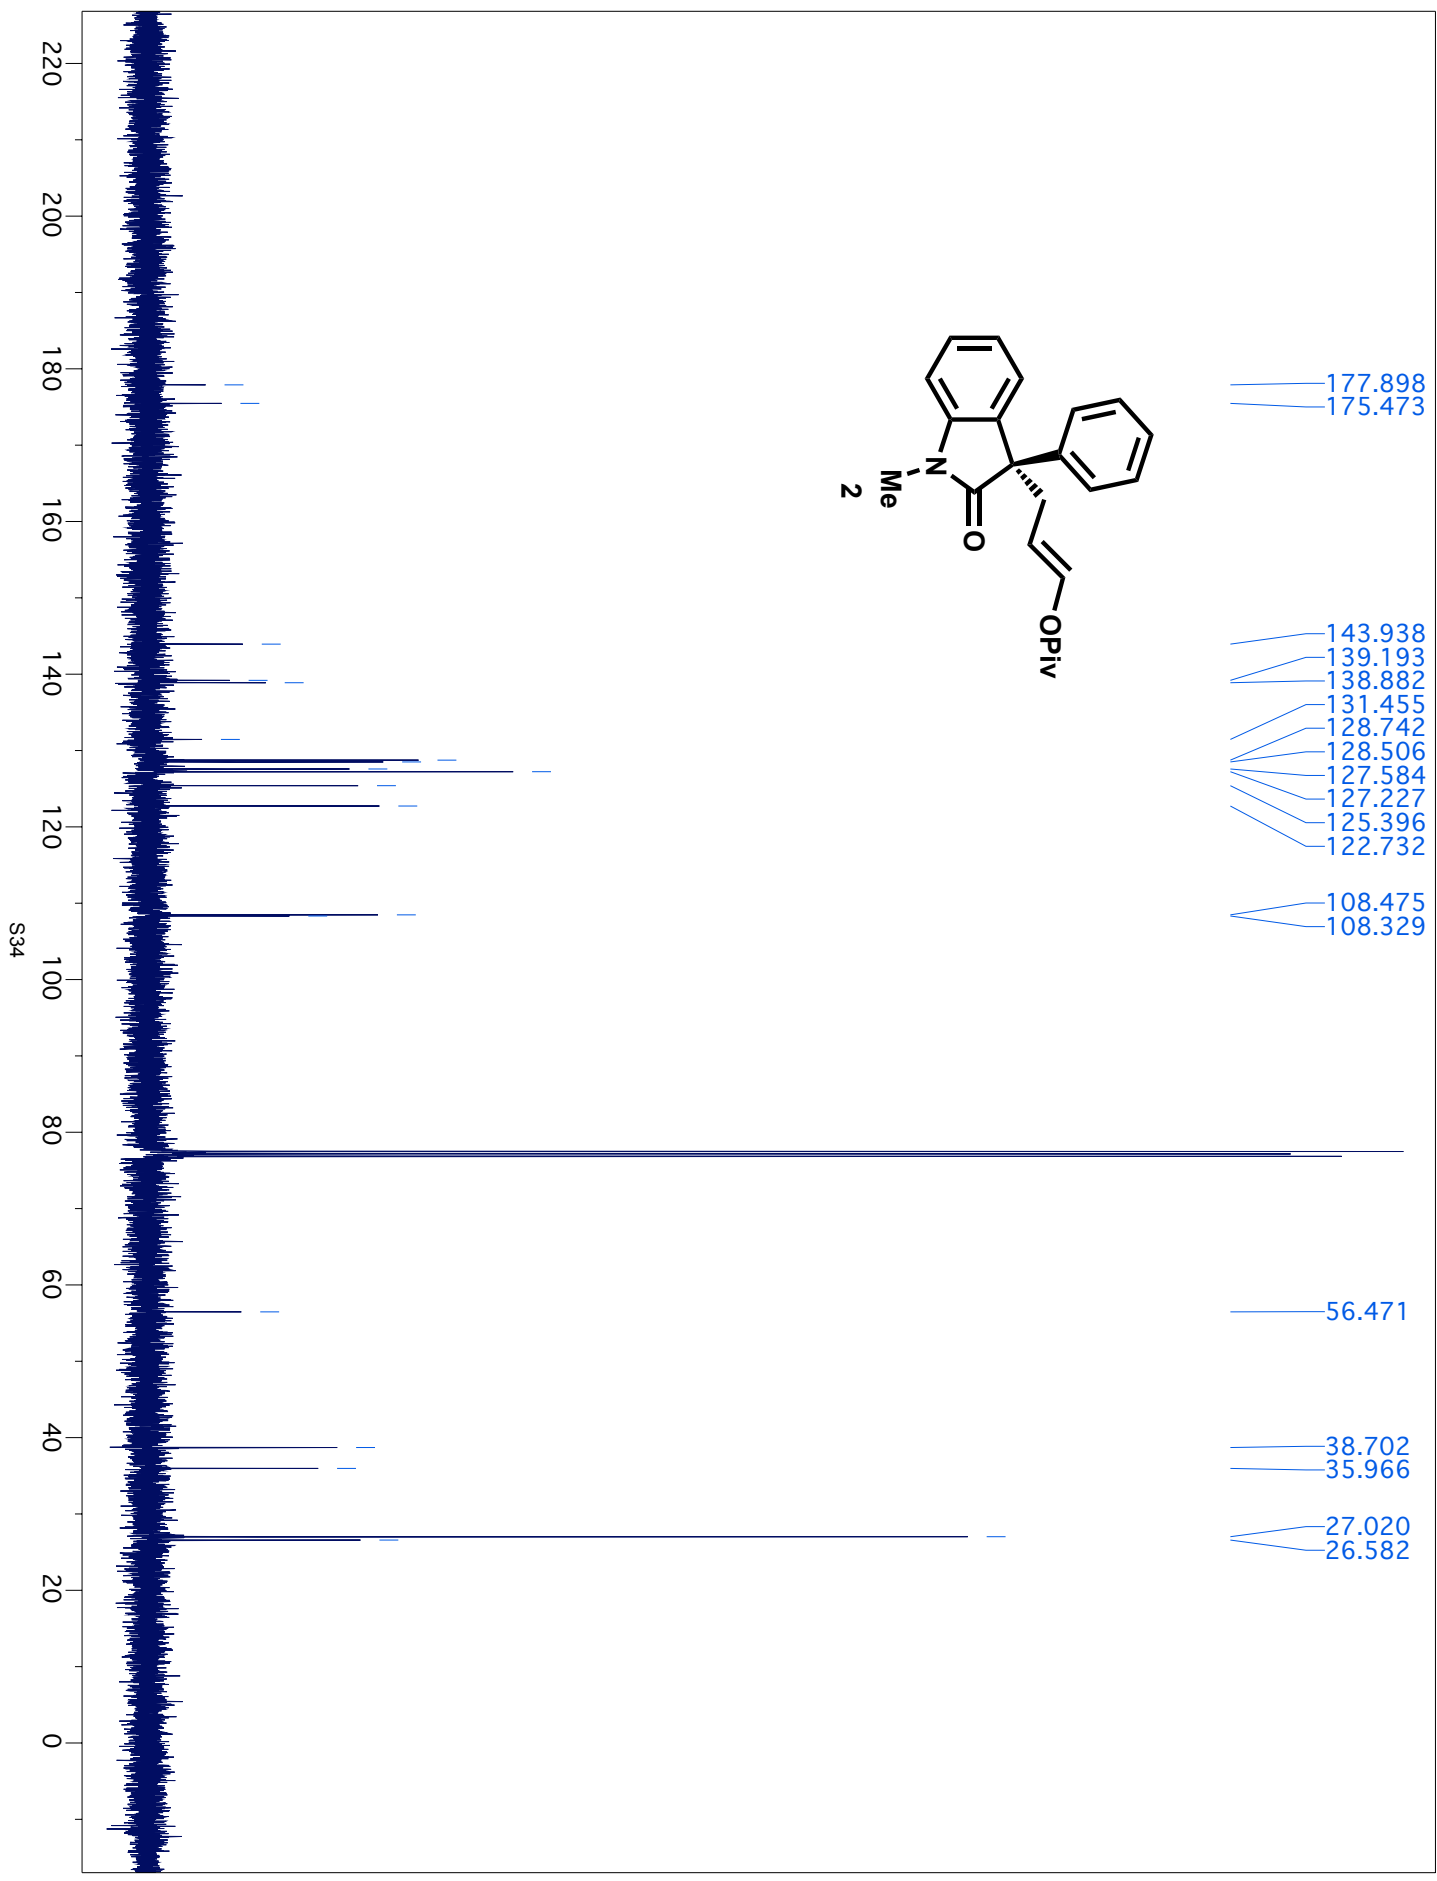

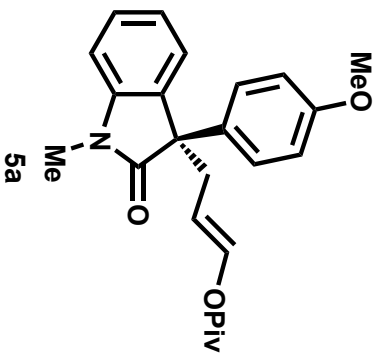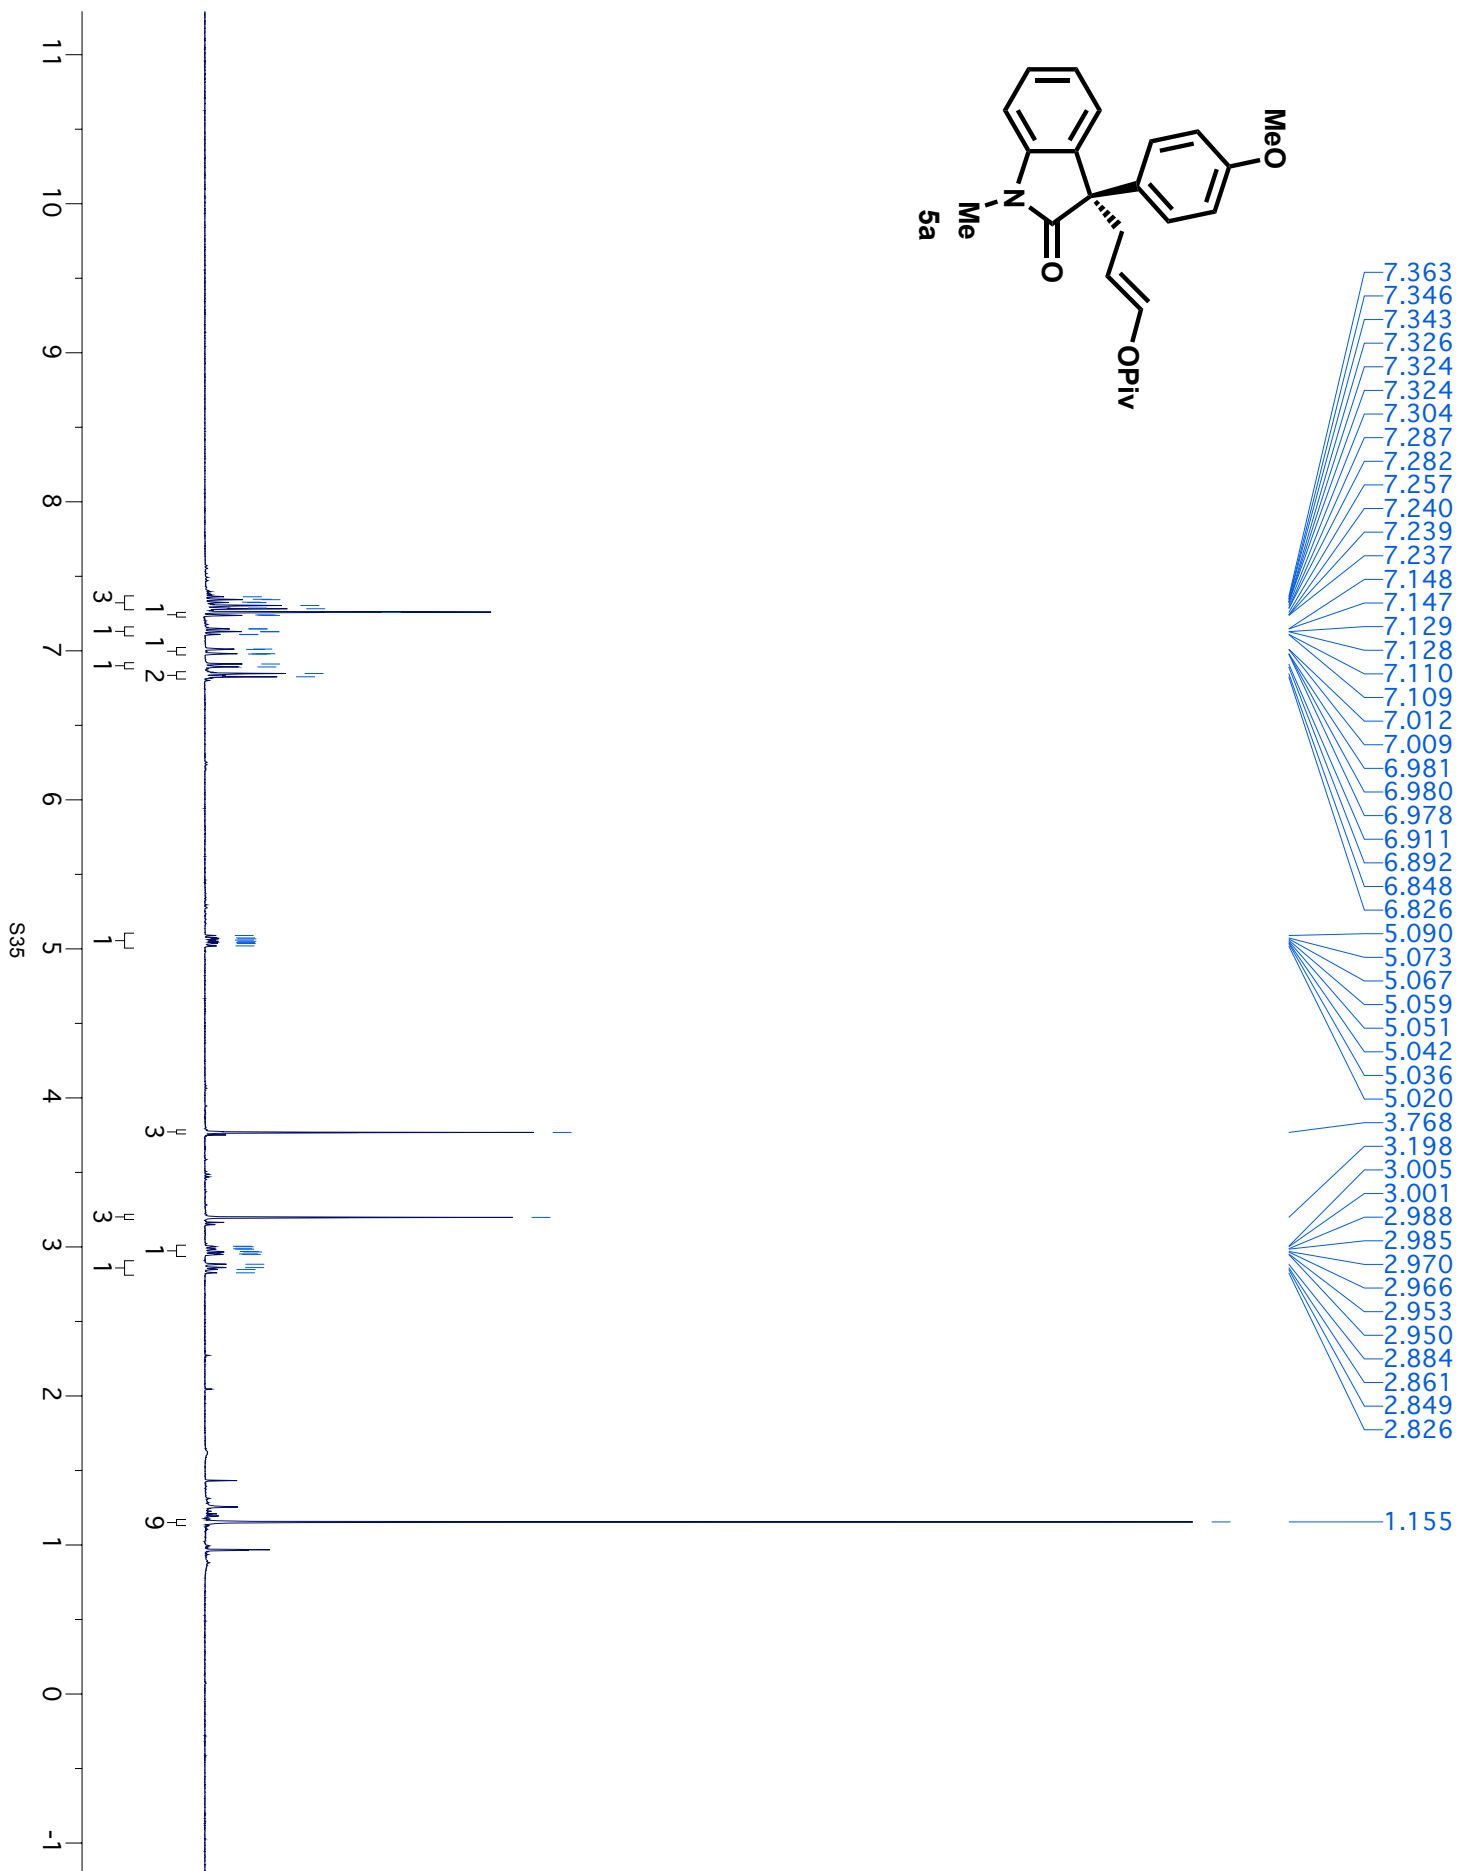

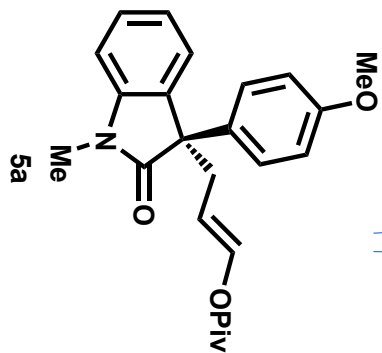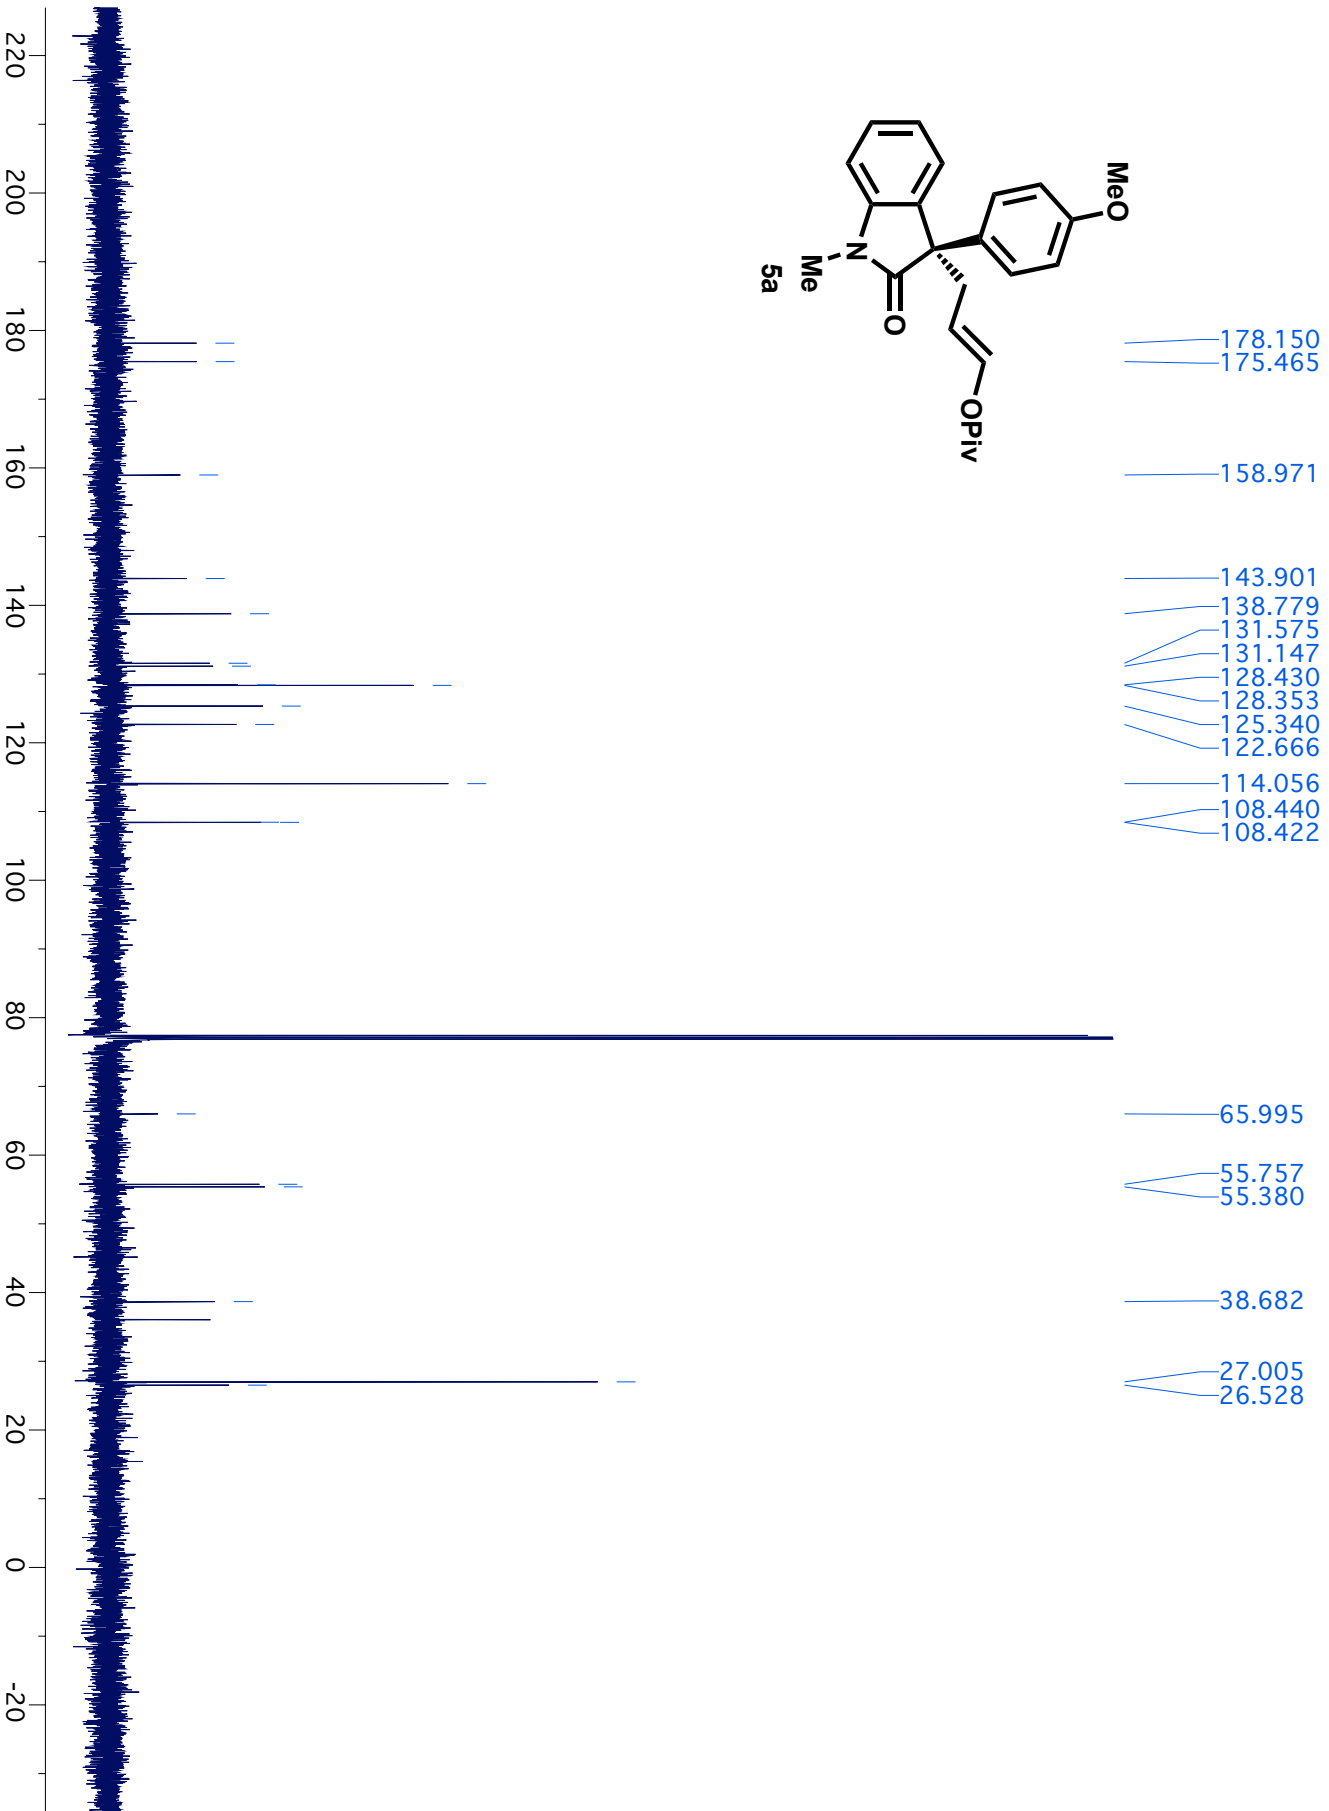

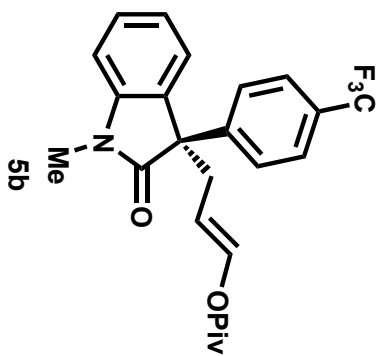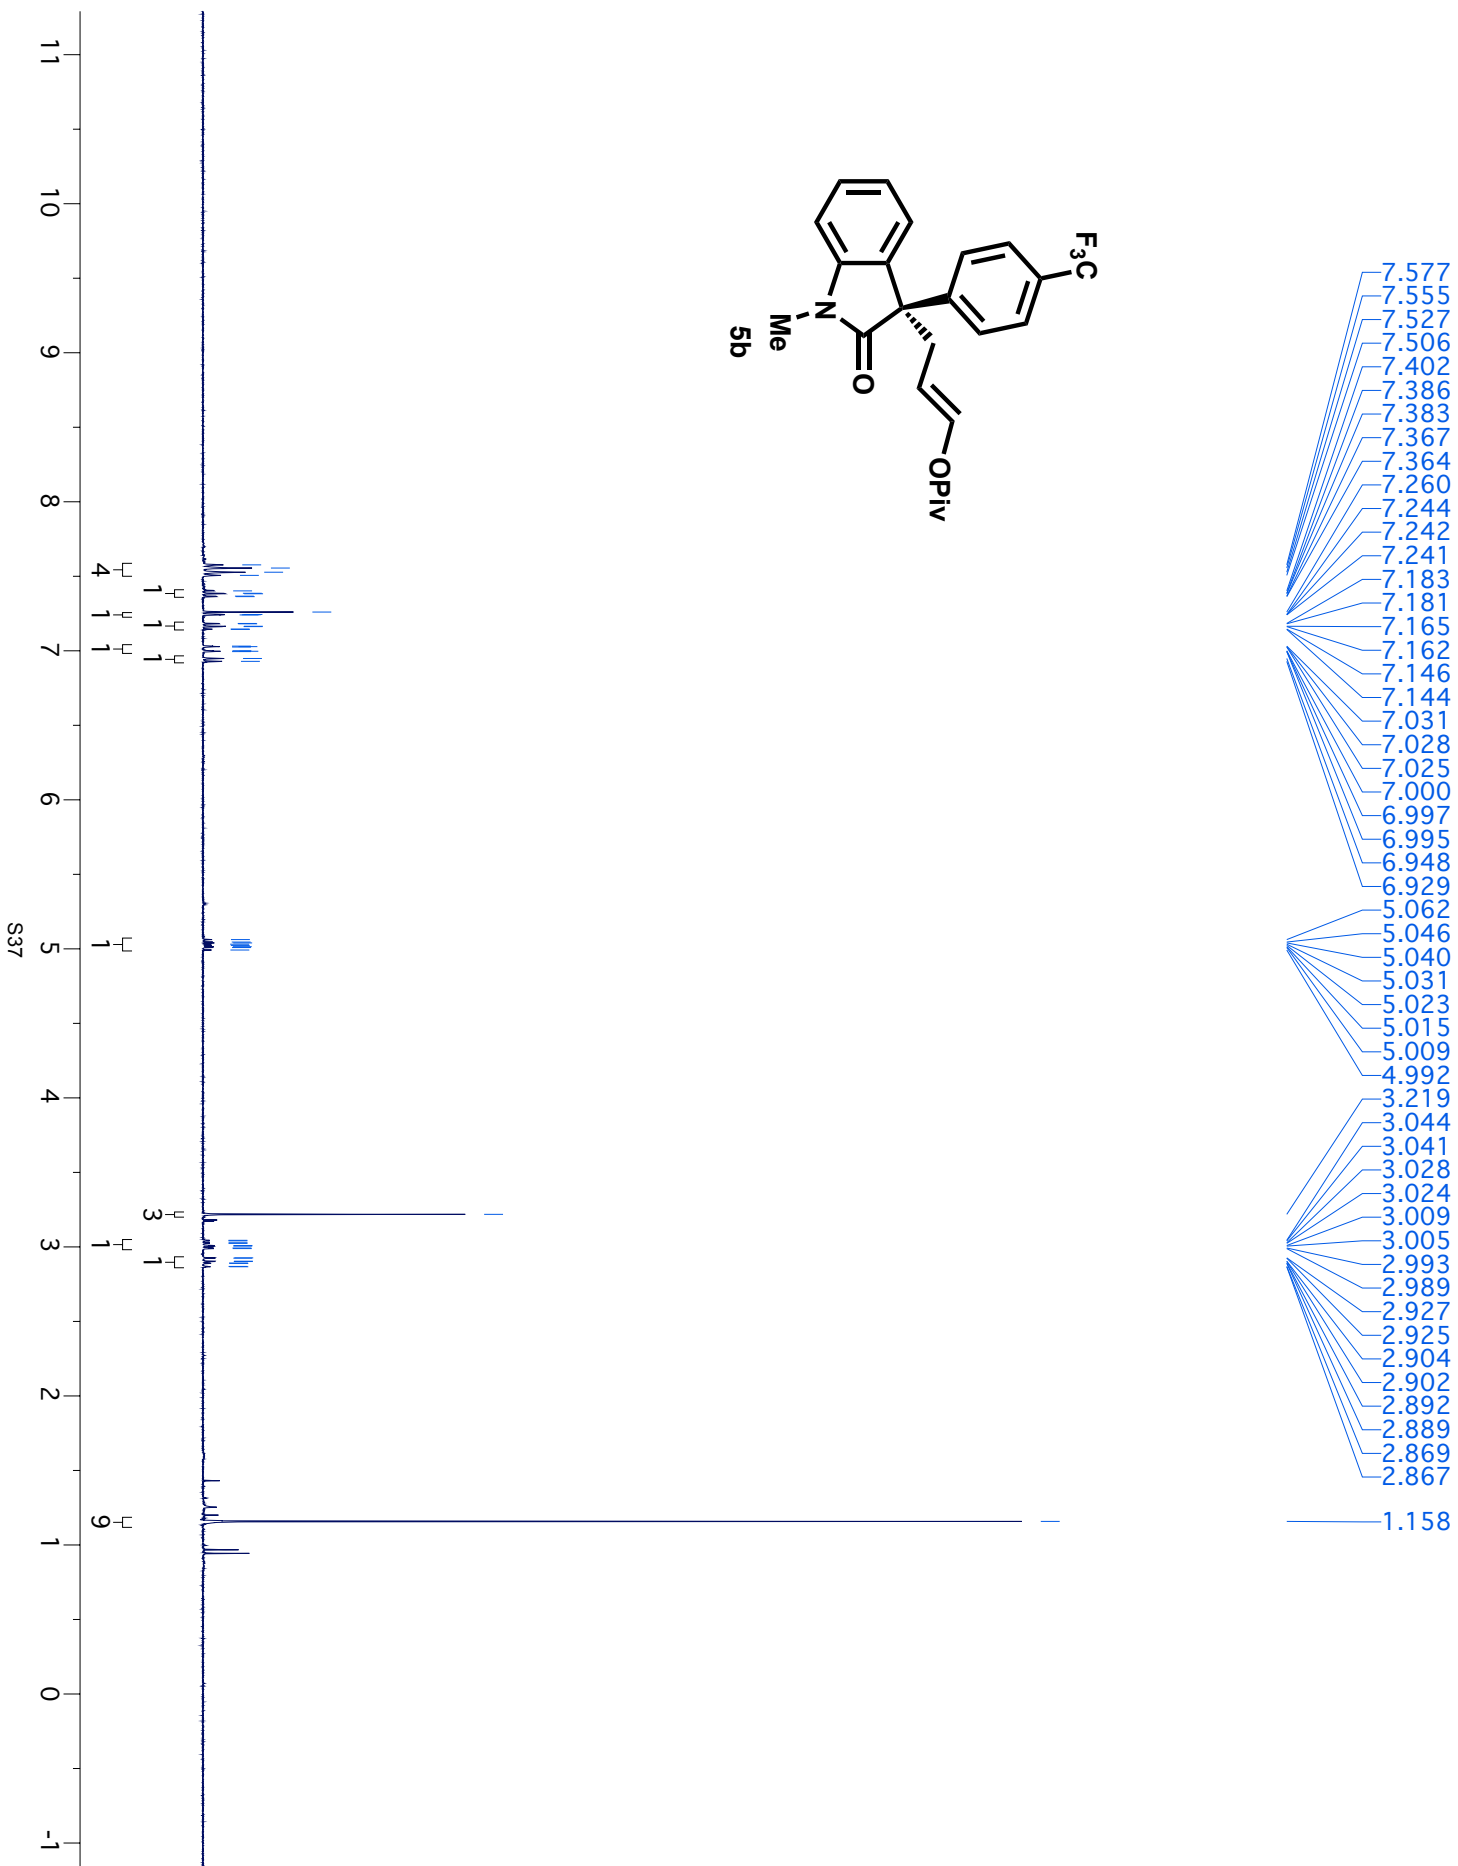

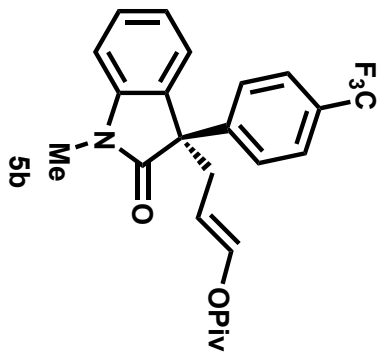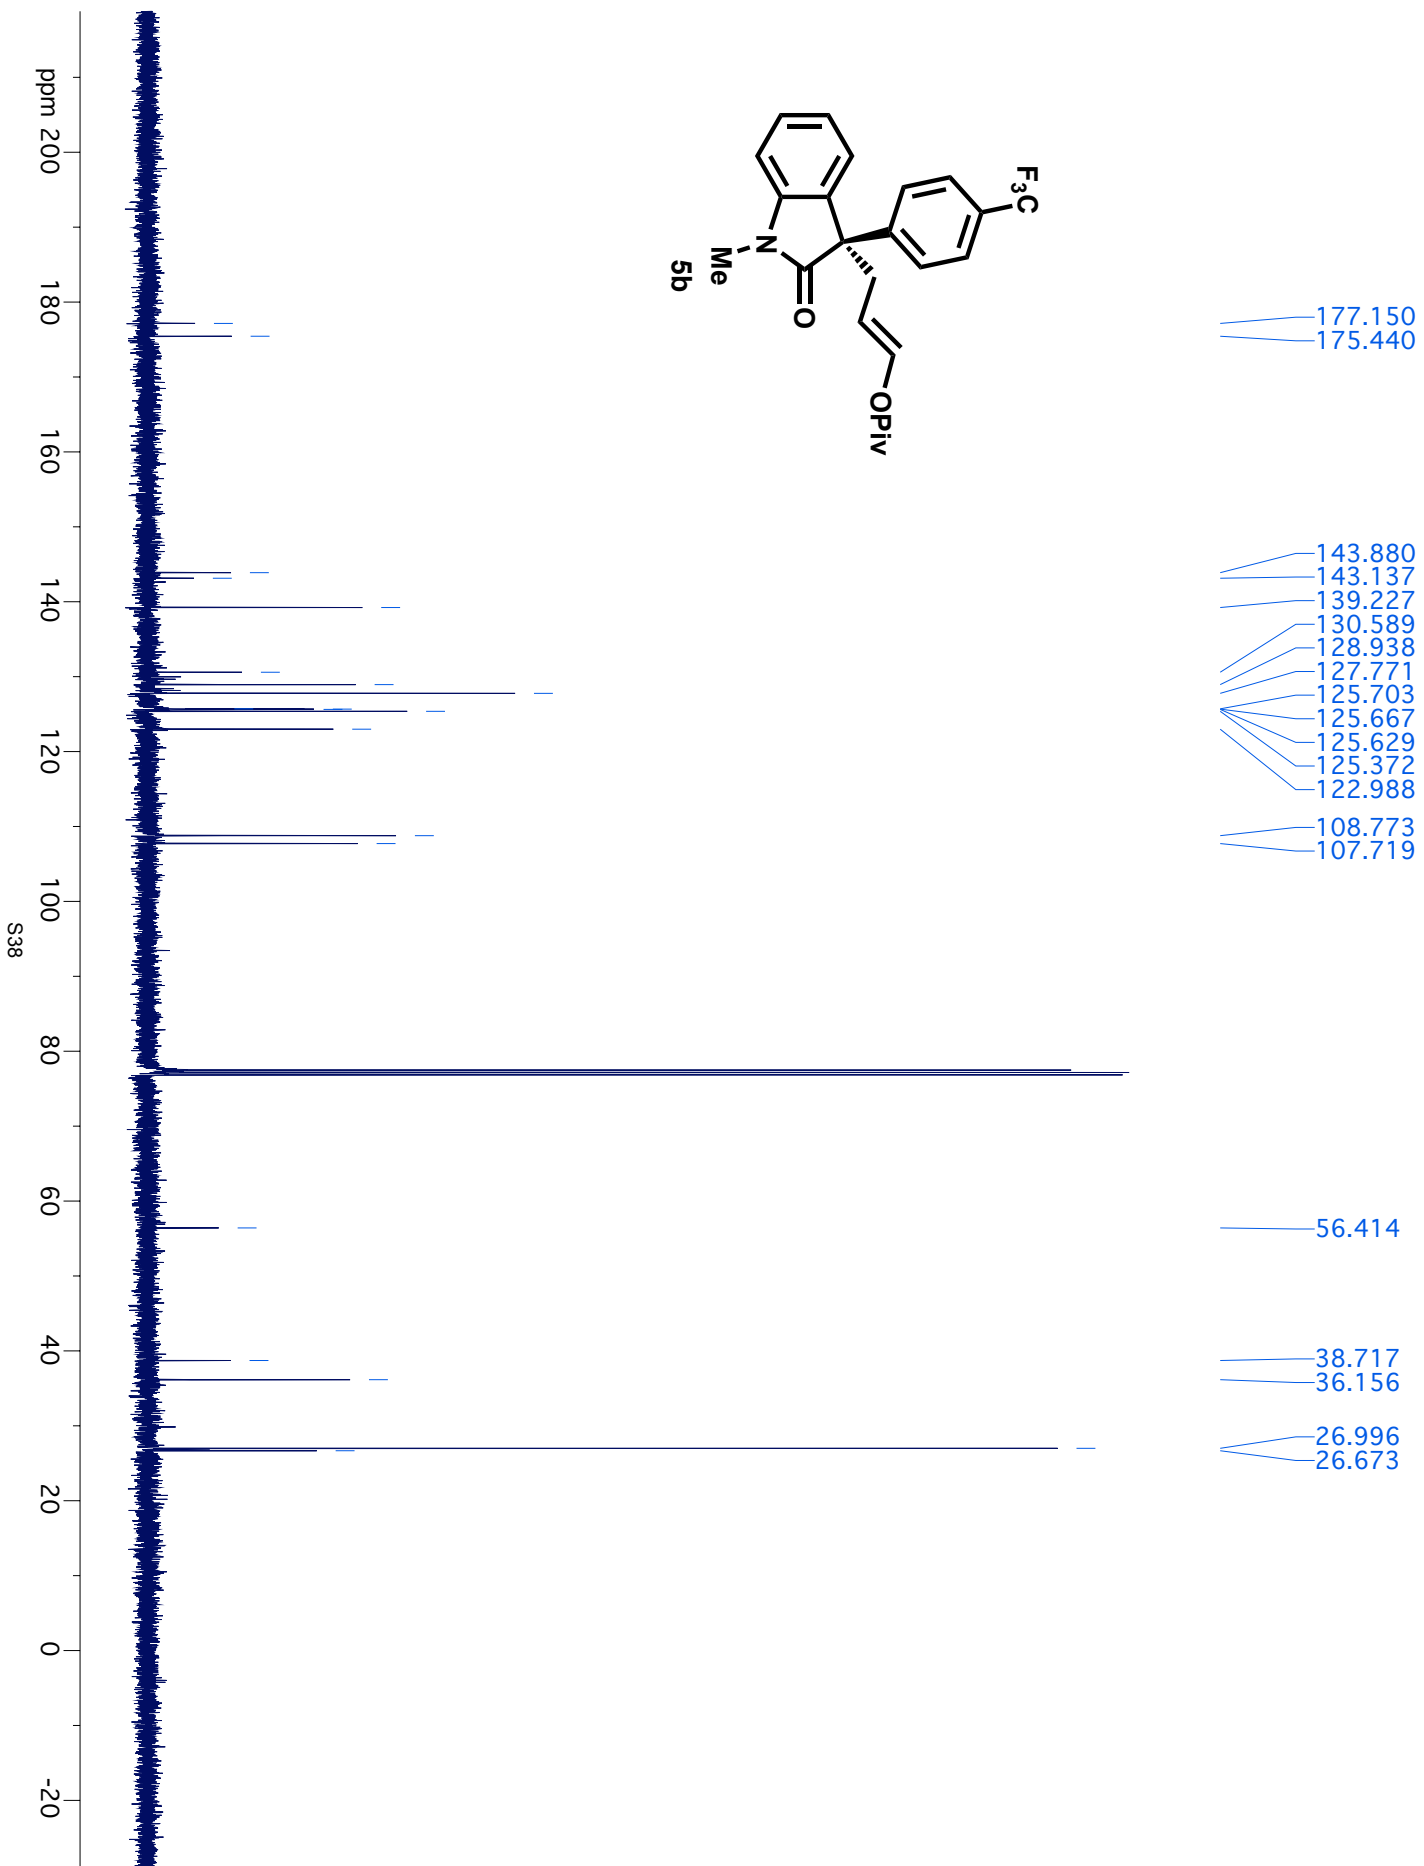

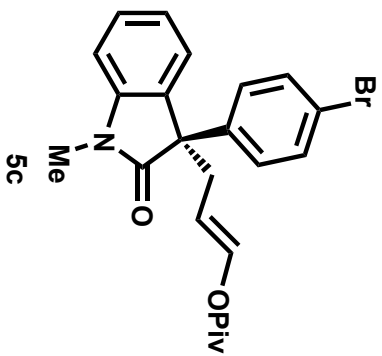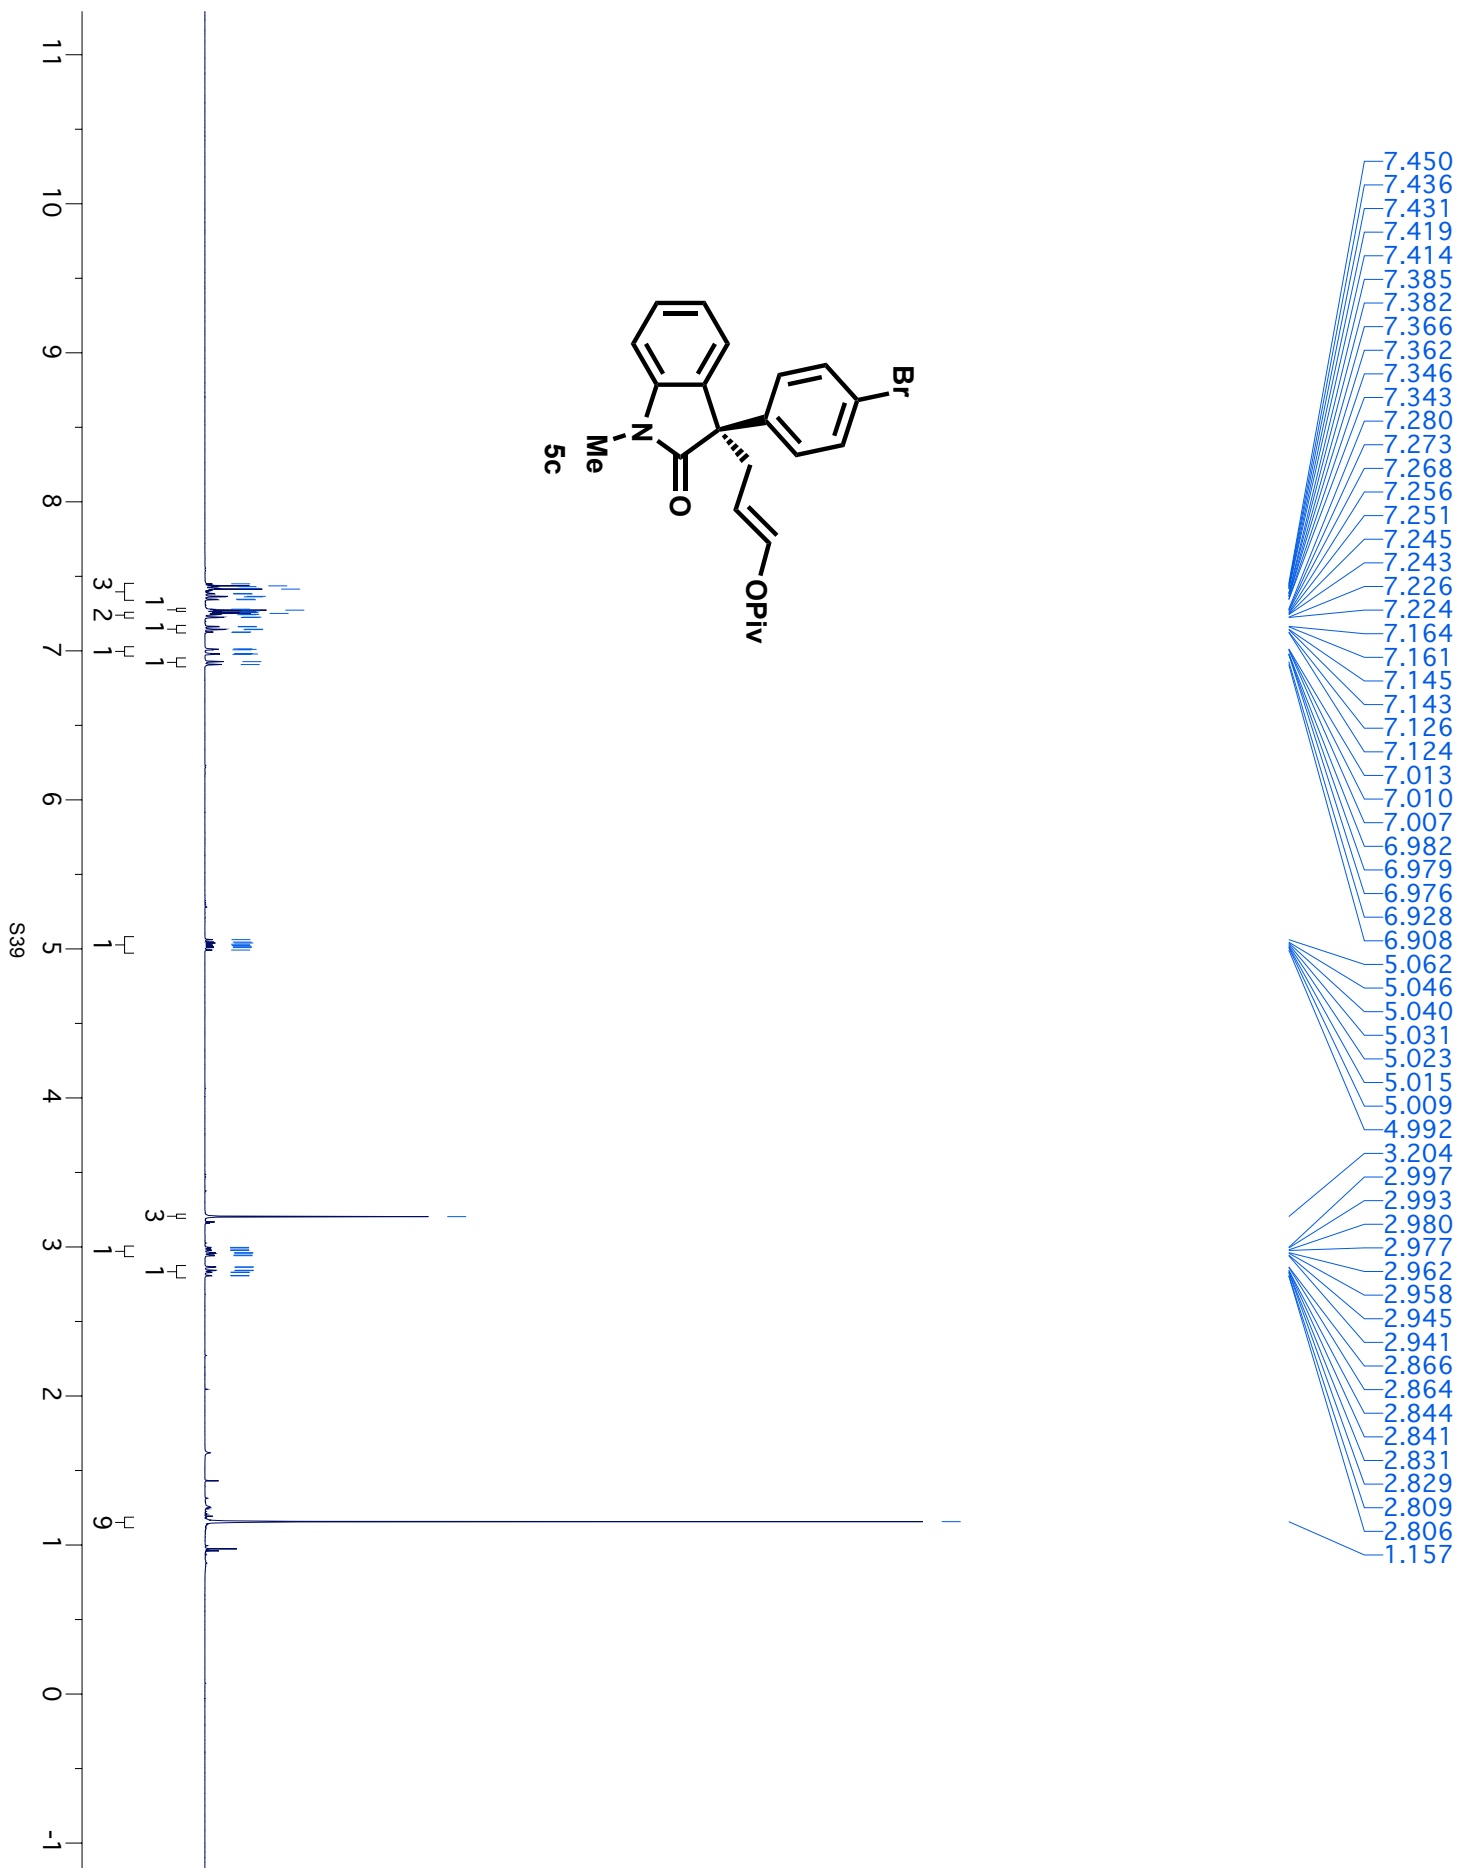

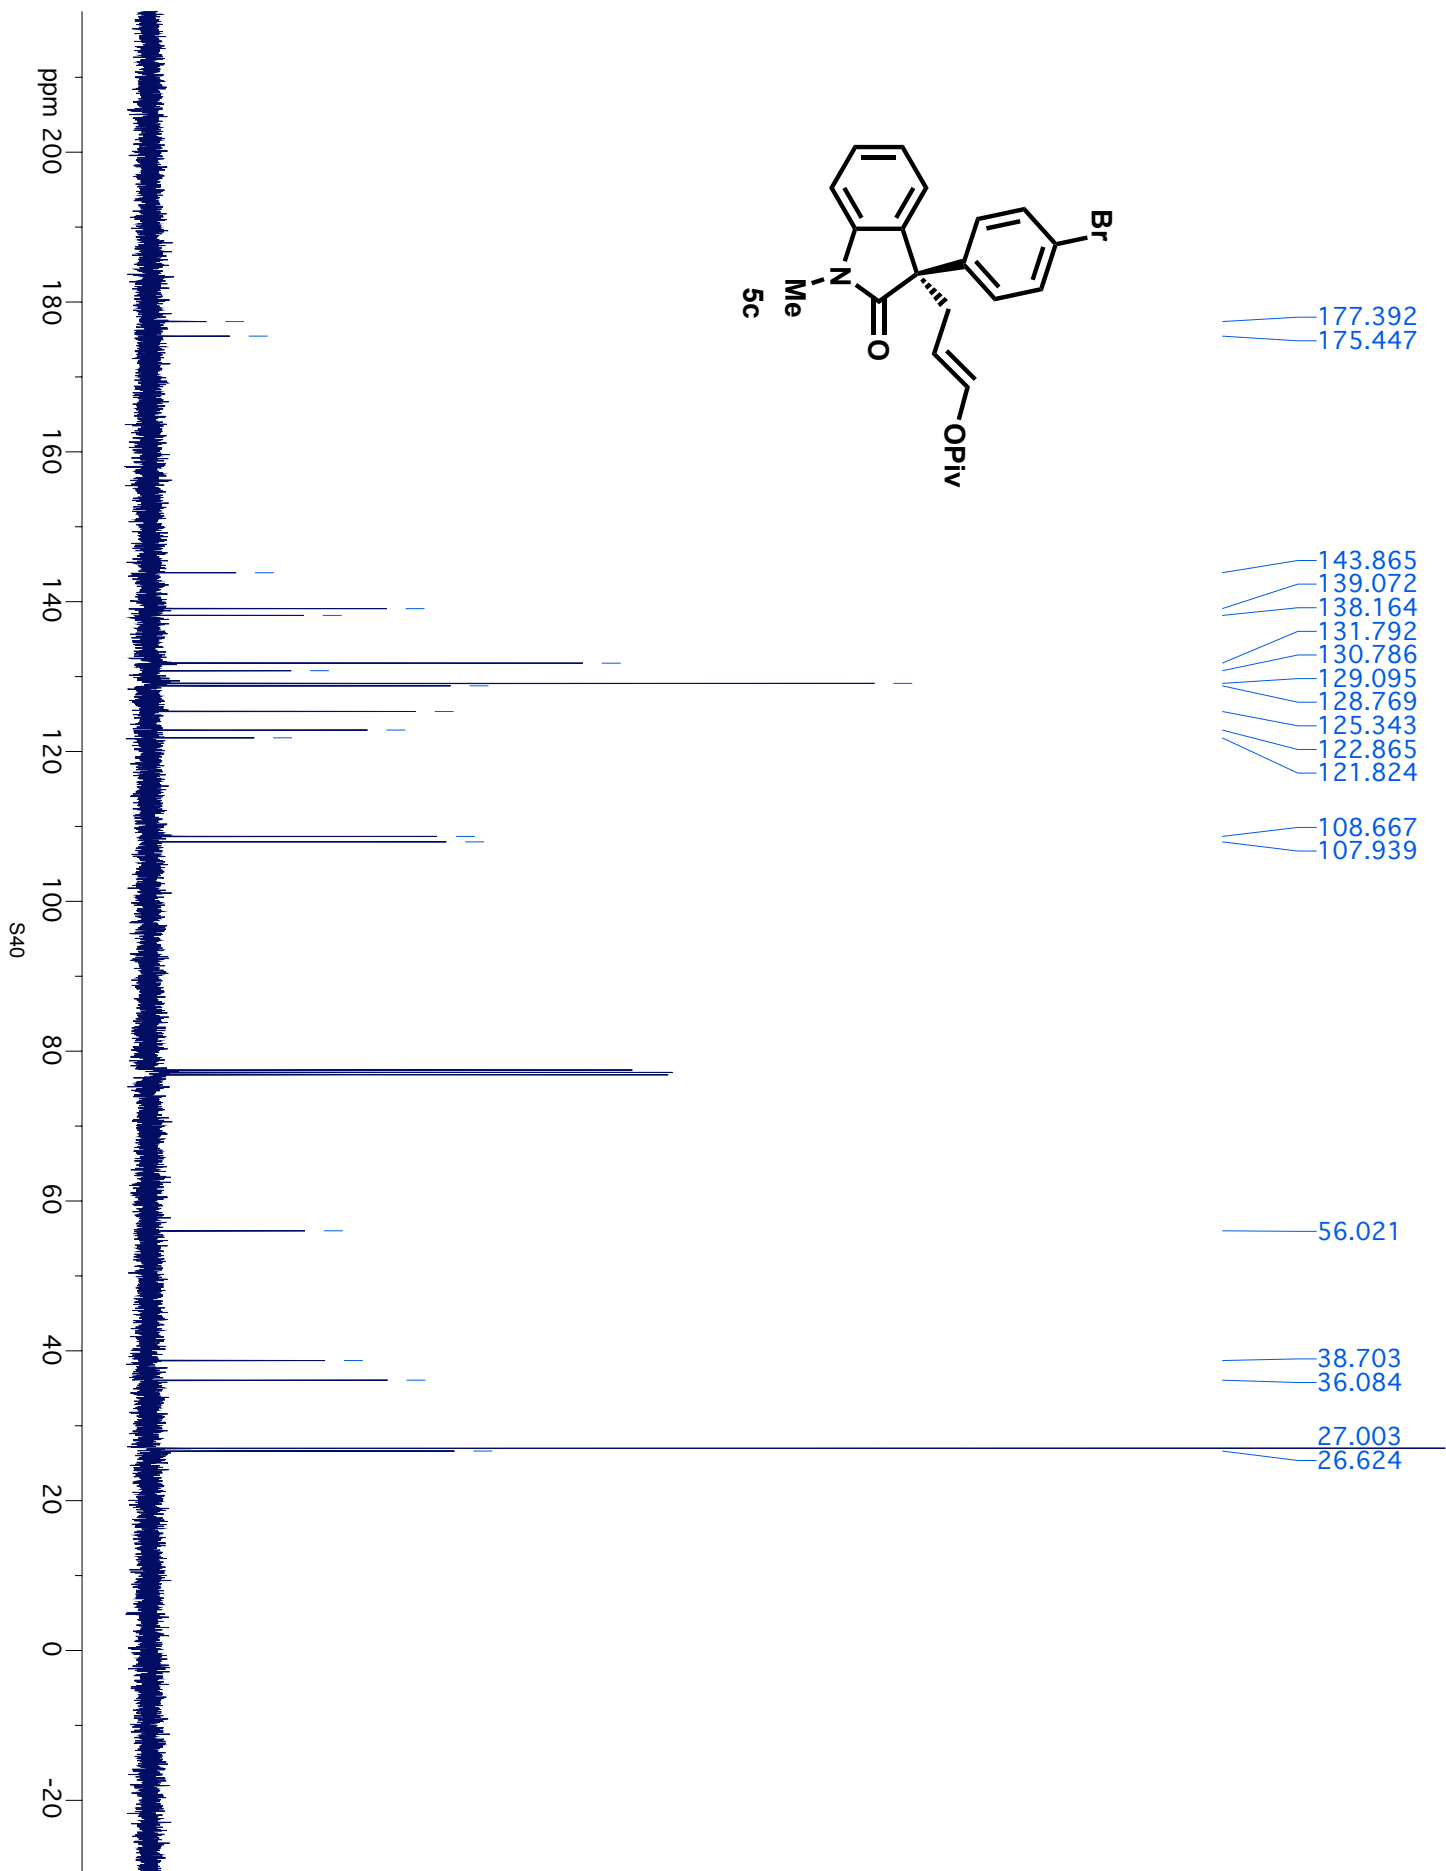

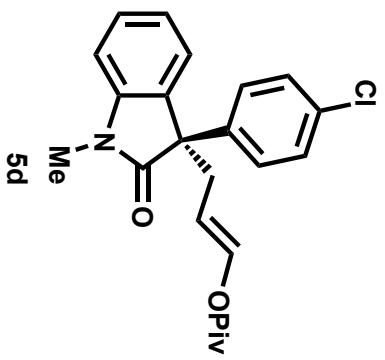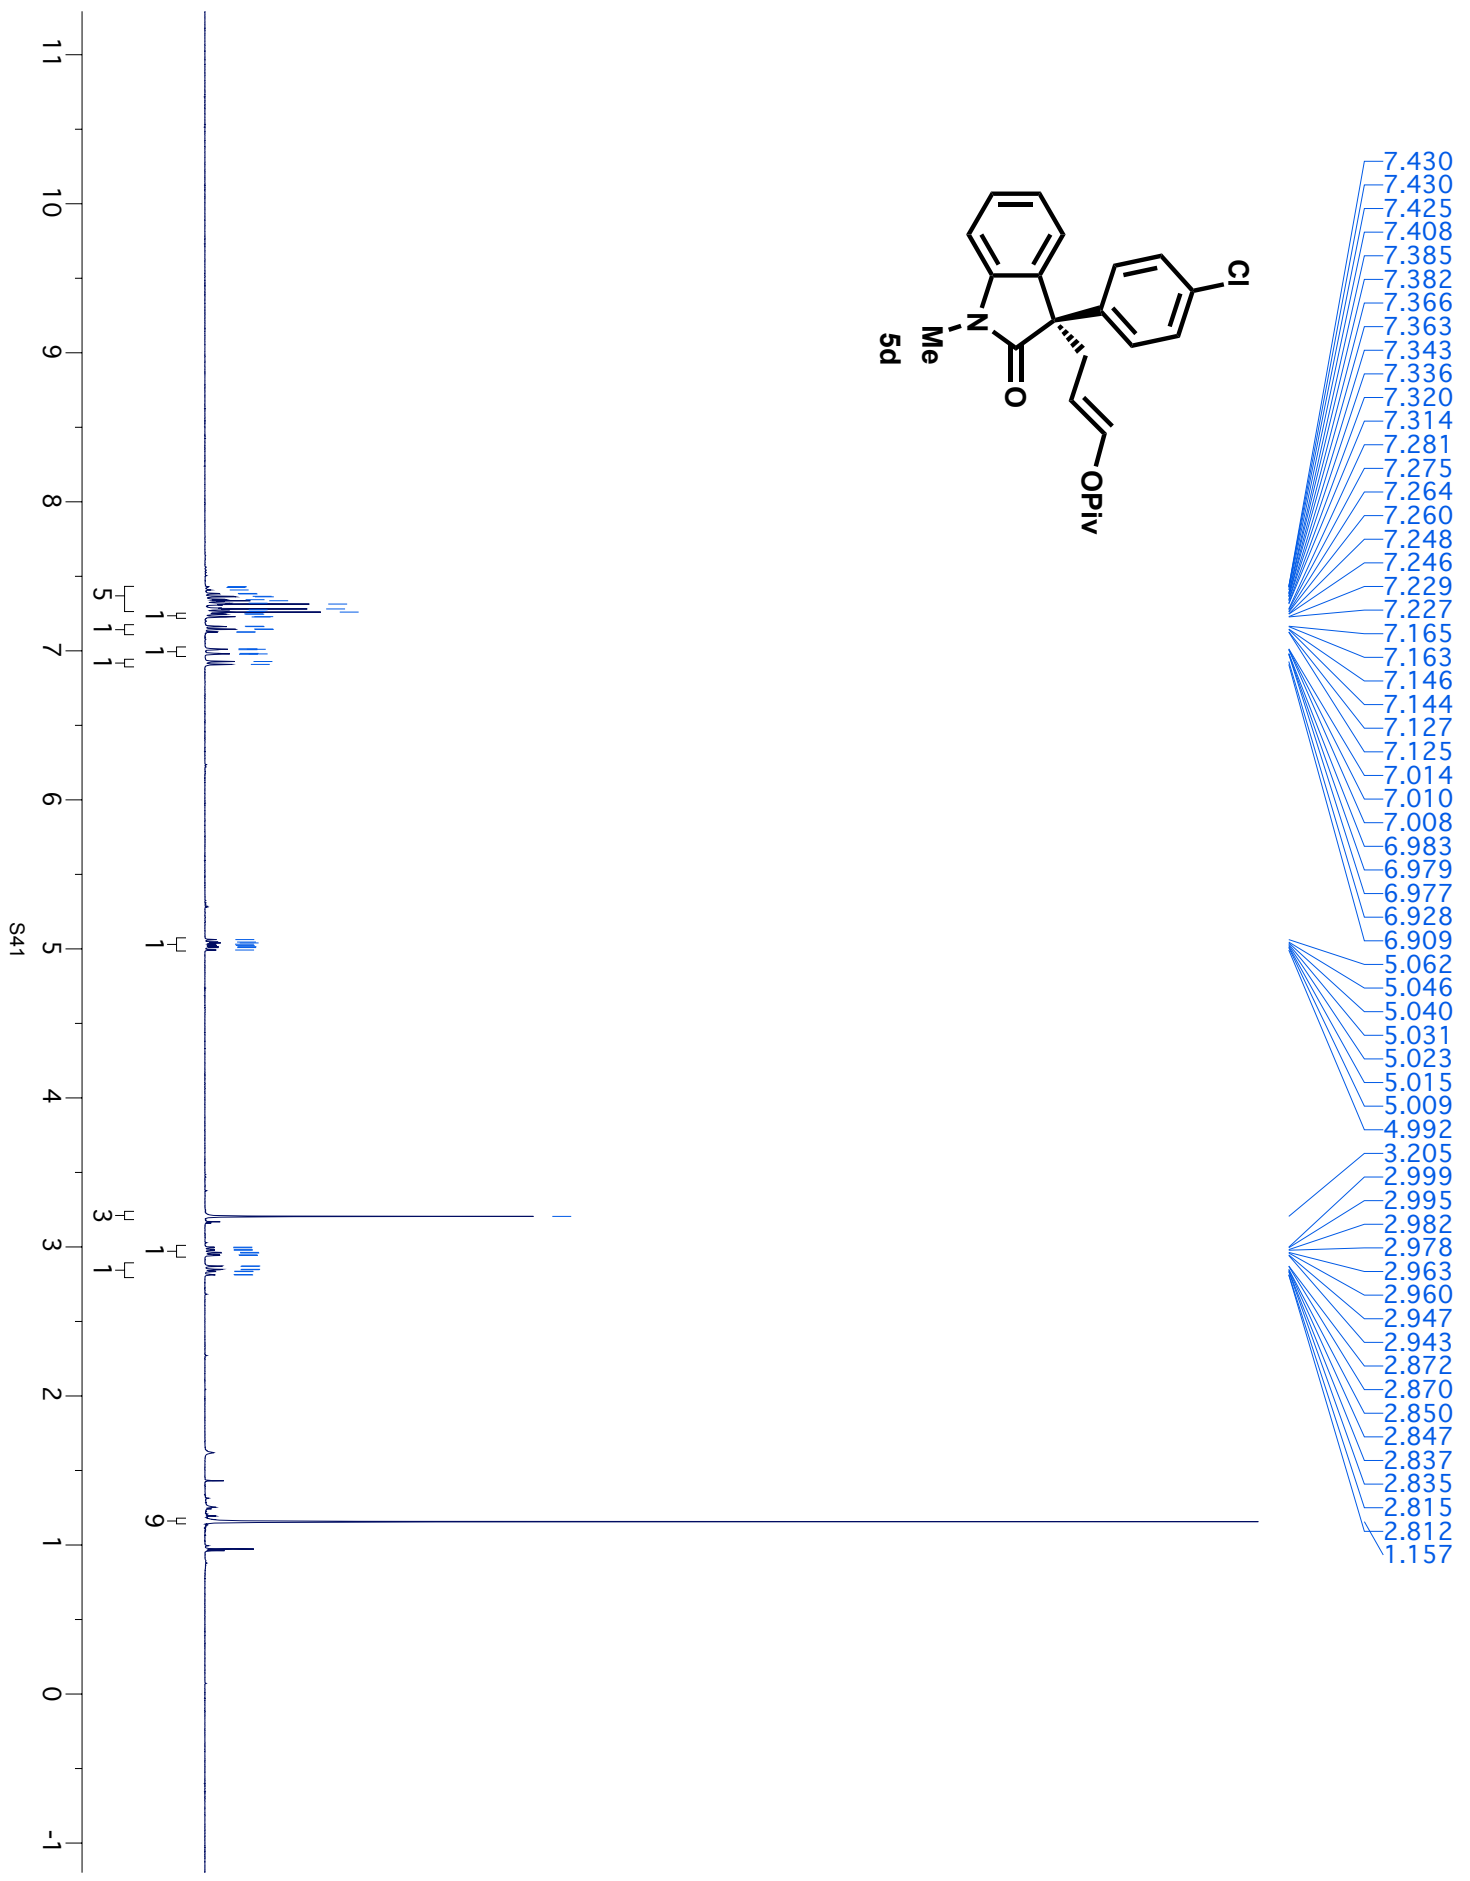



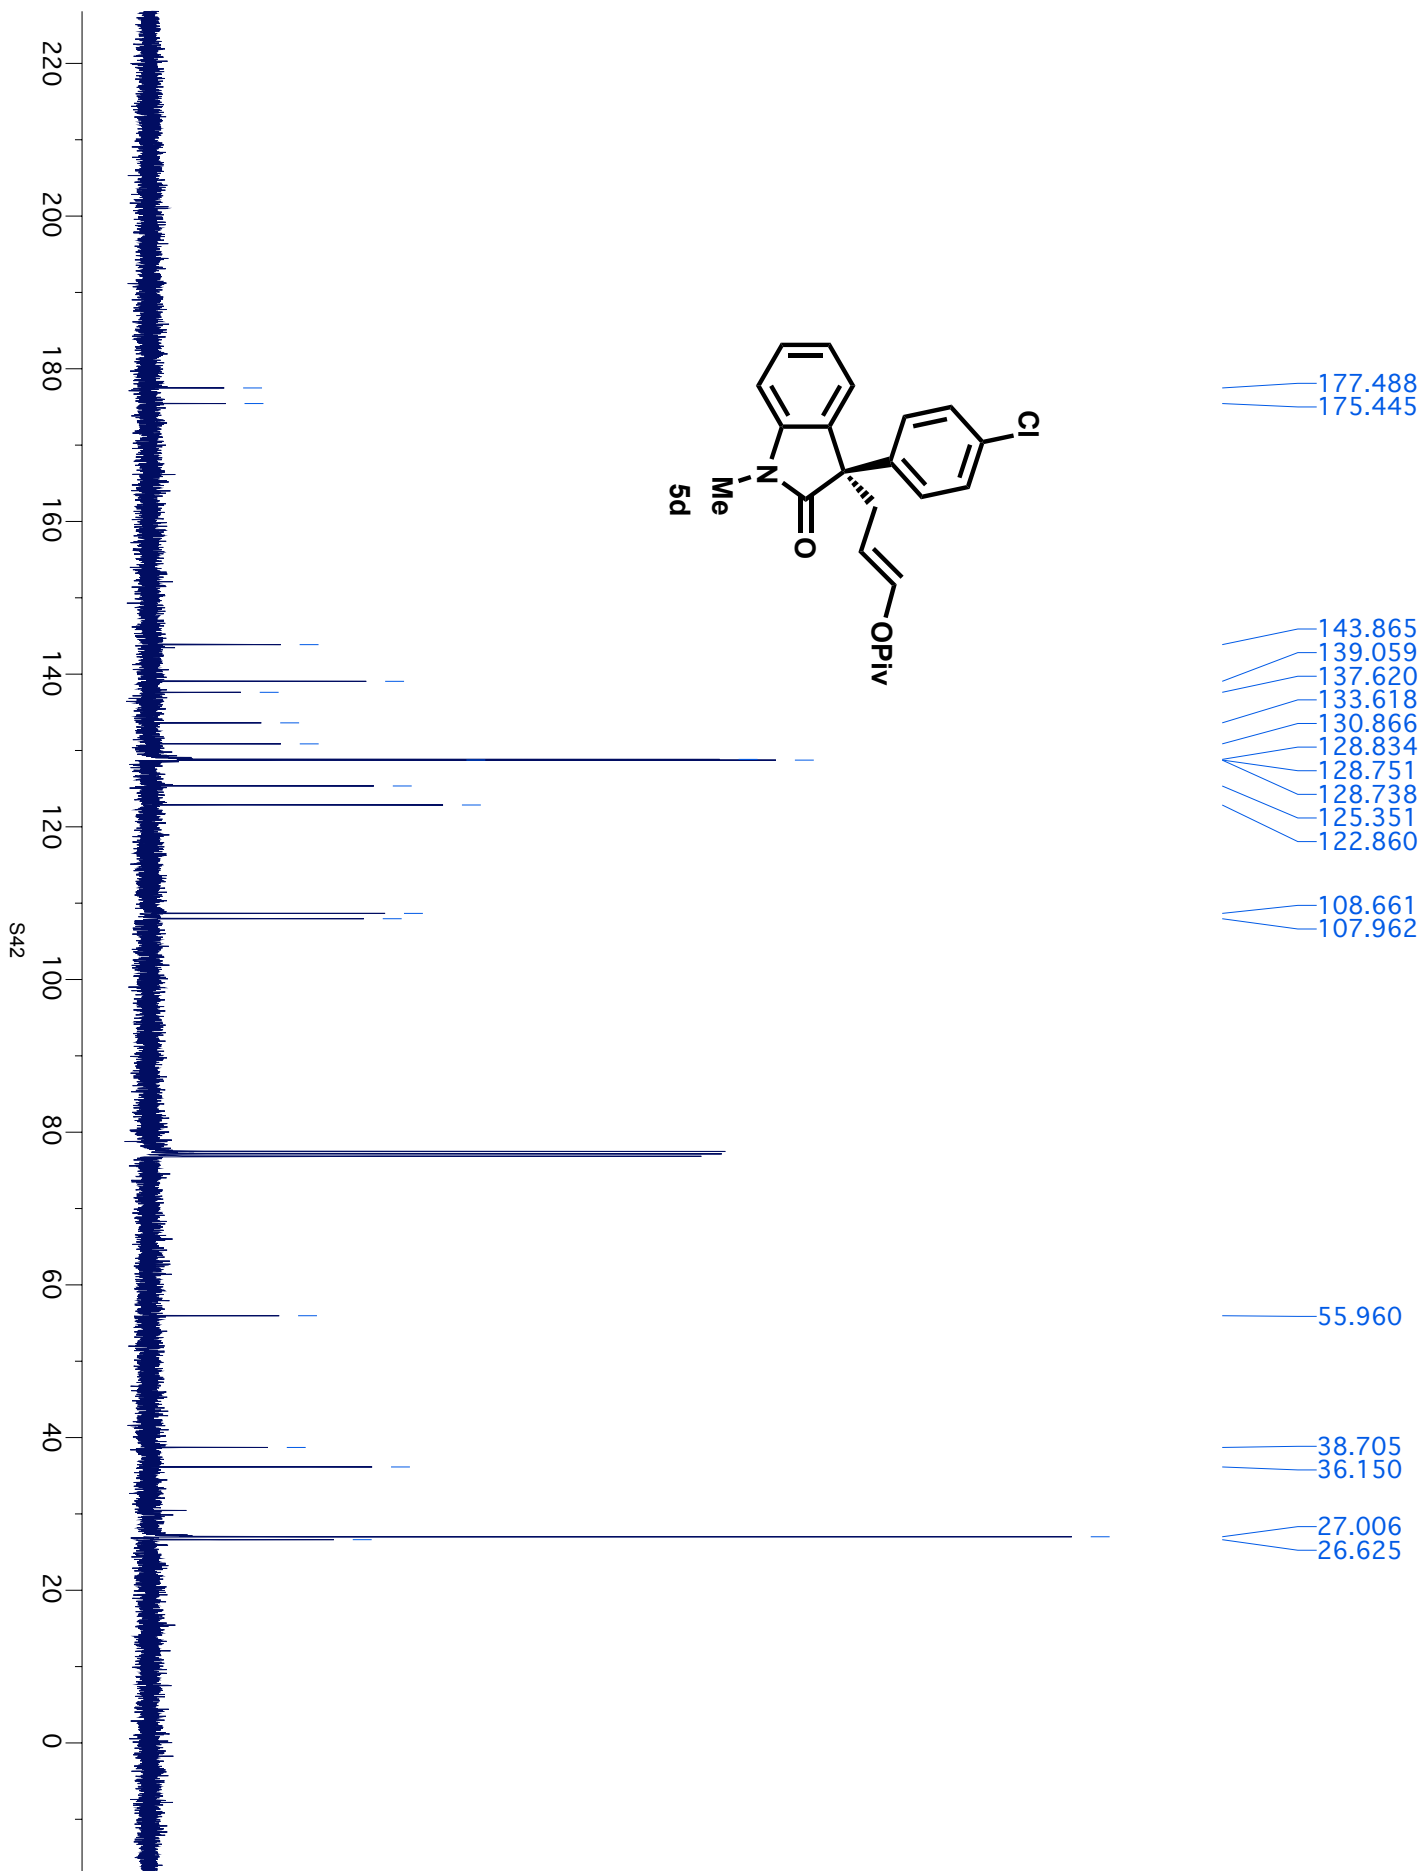

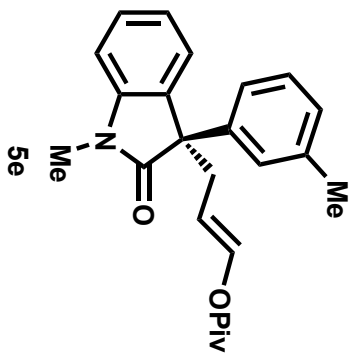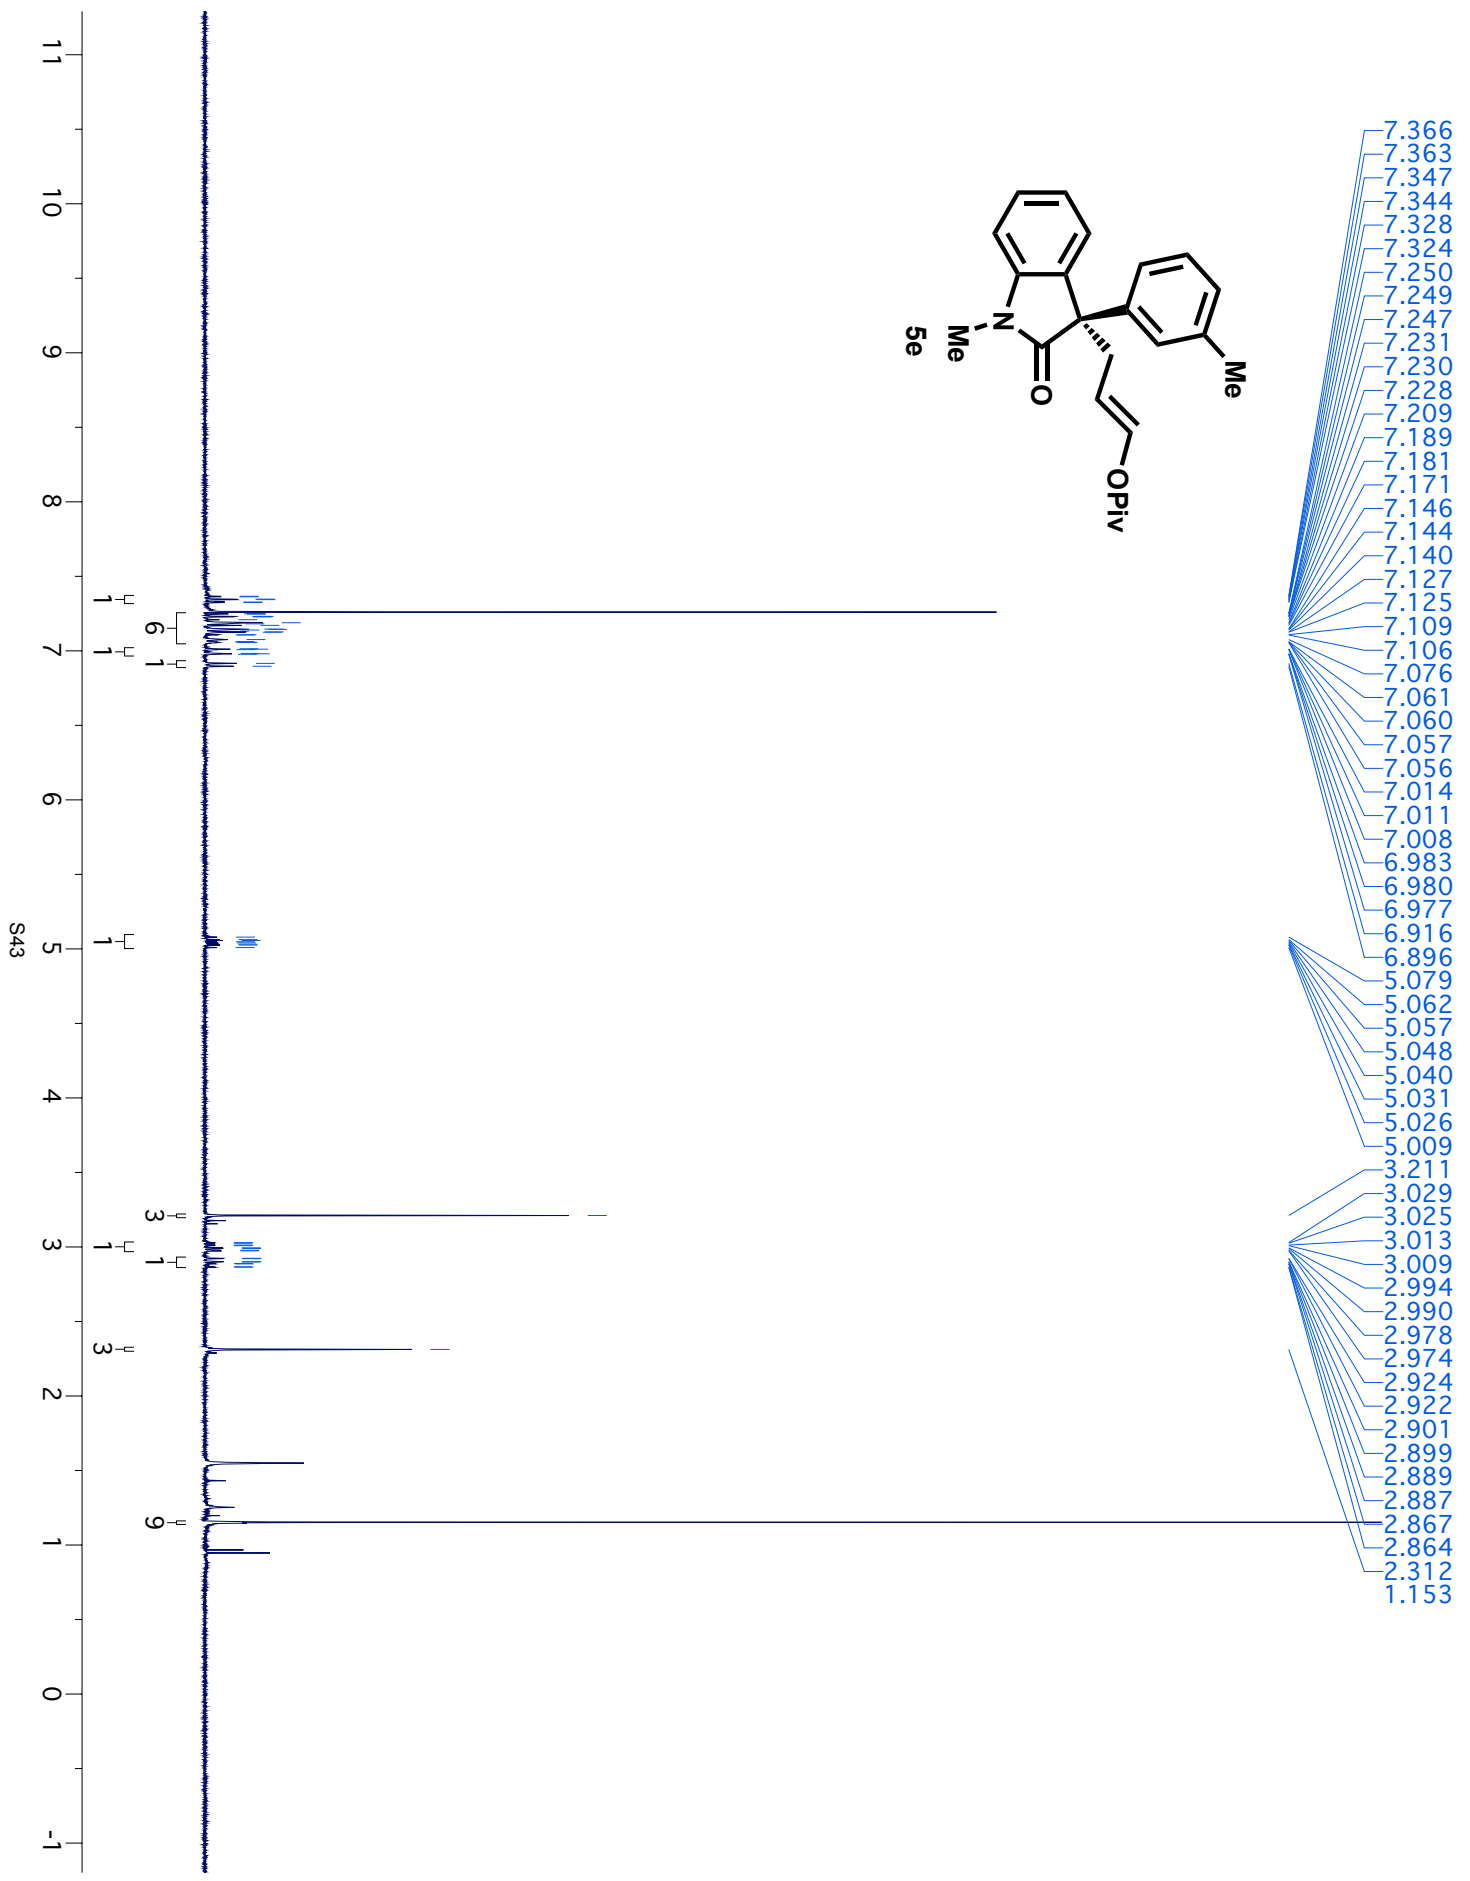

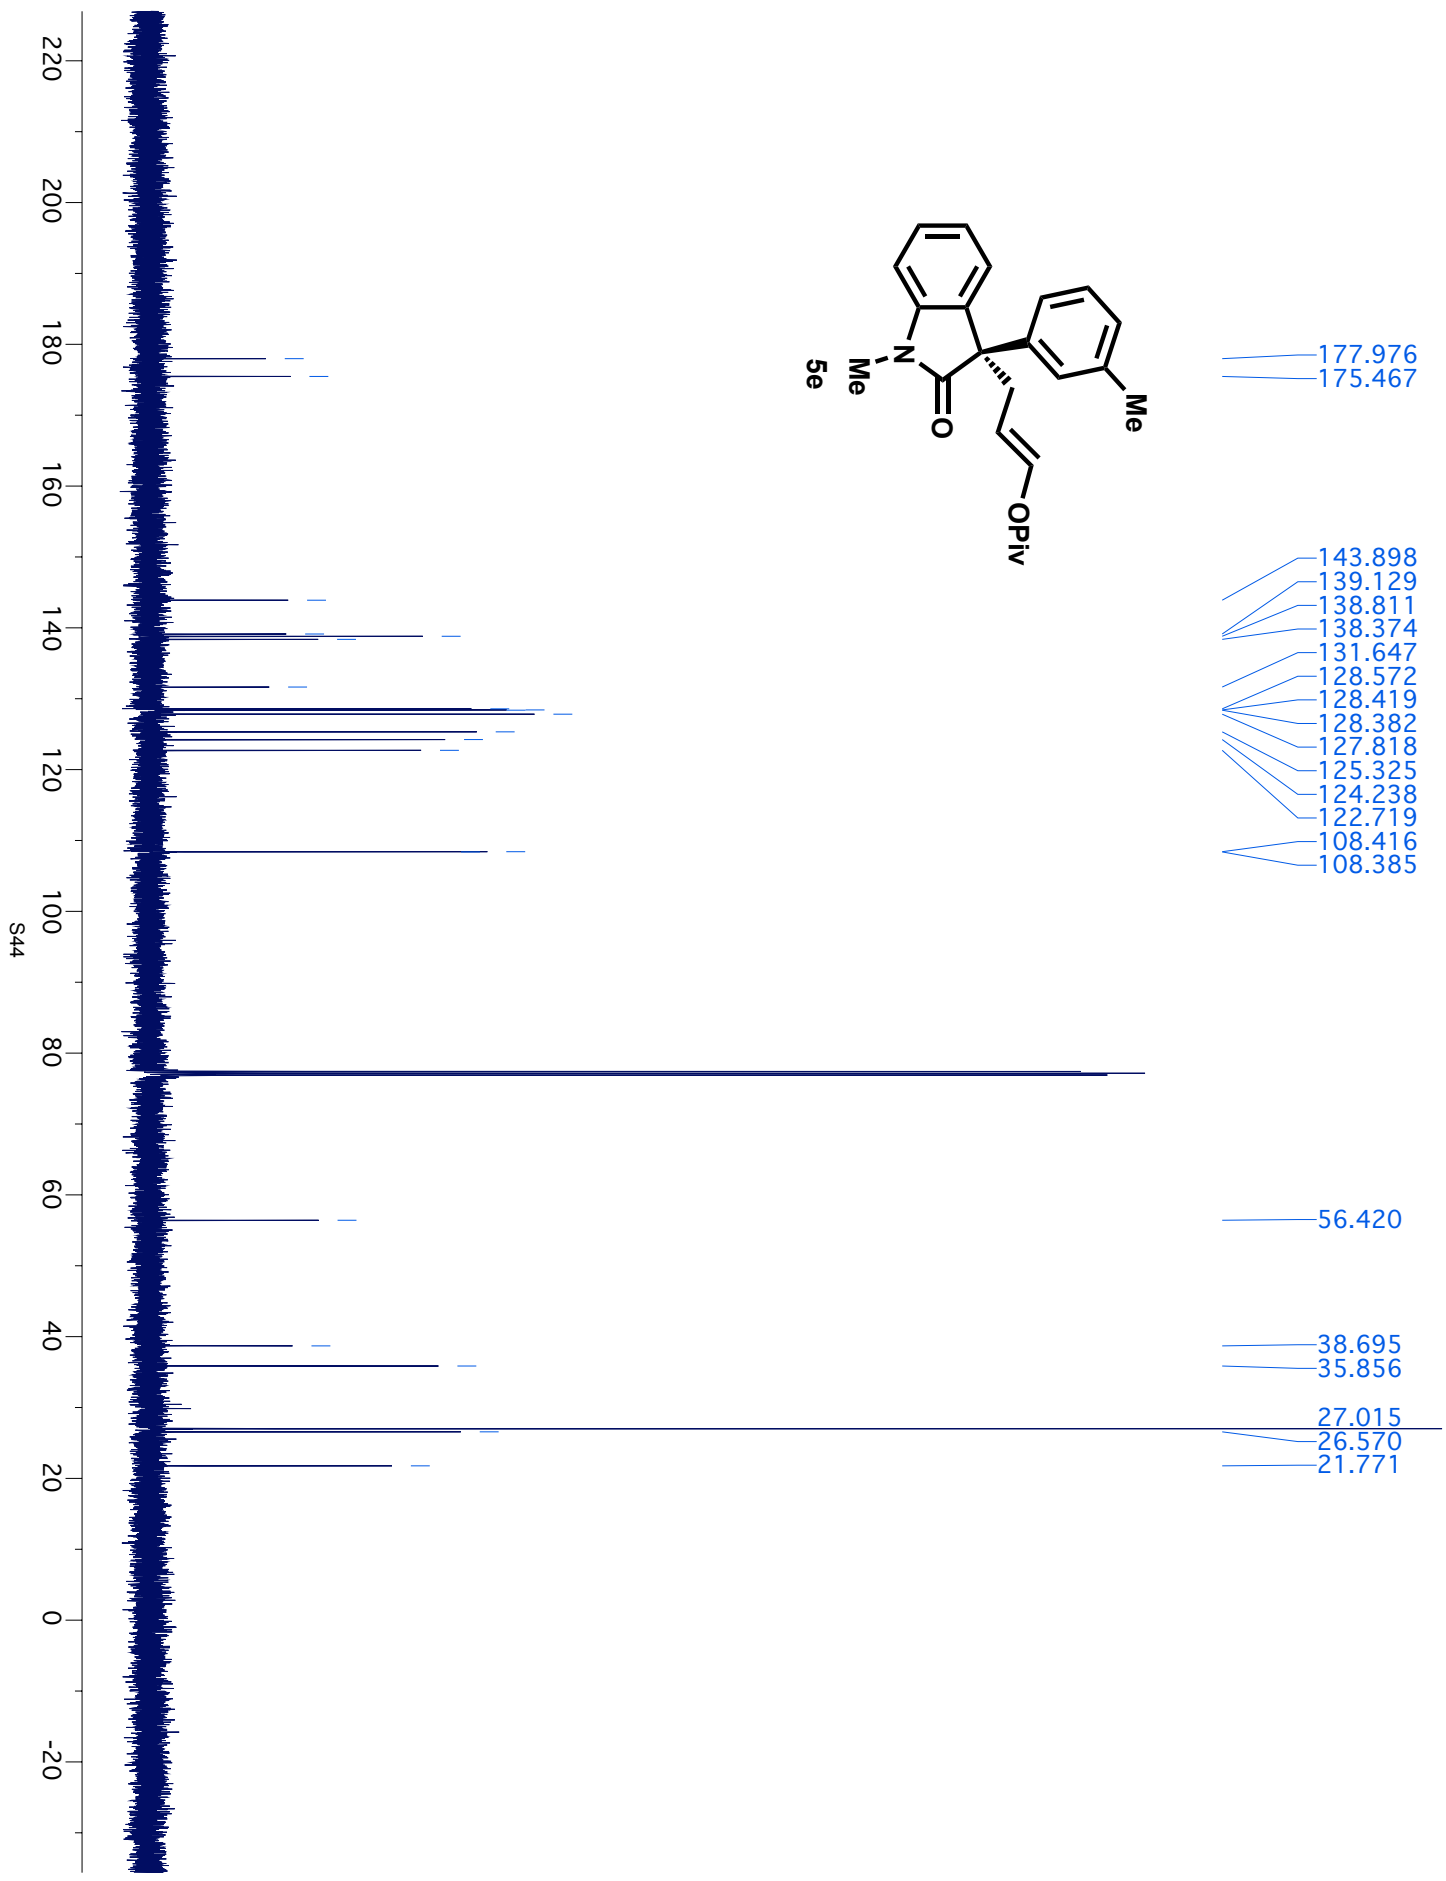

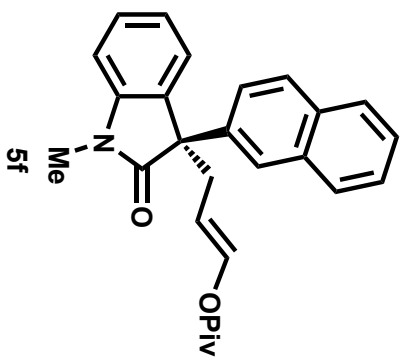

7.059  
7.059  
7.058  
7.057  
7.039

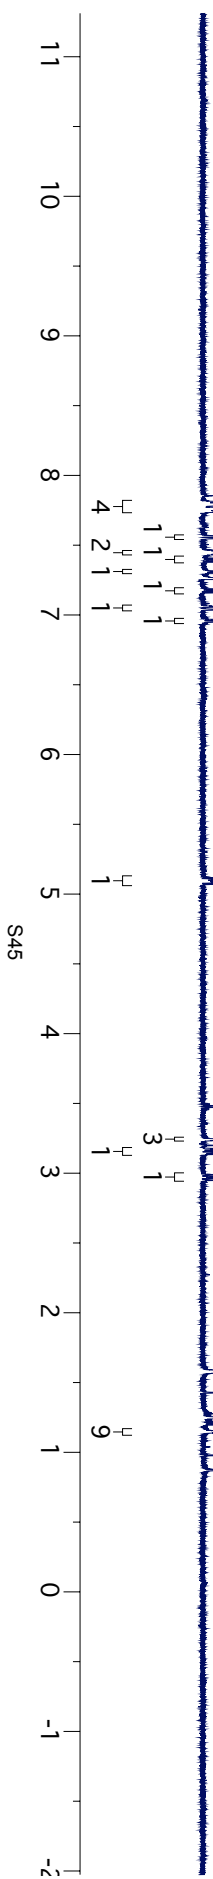

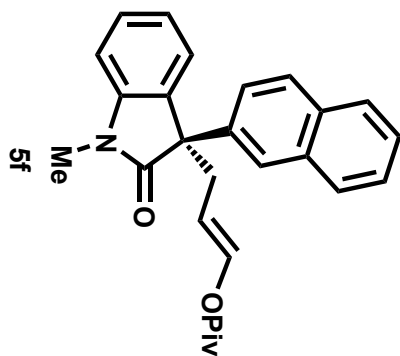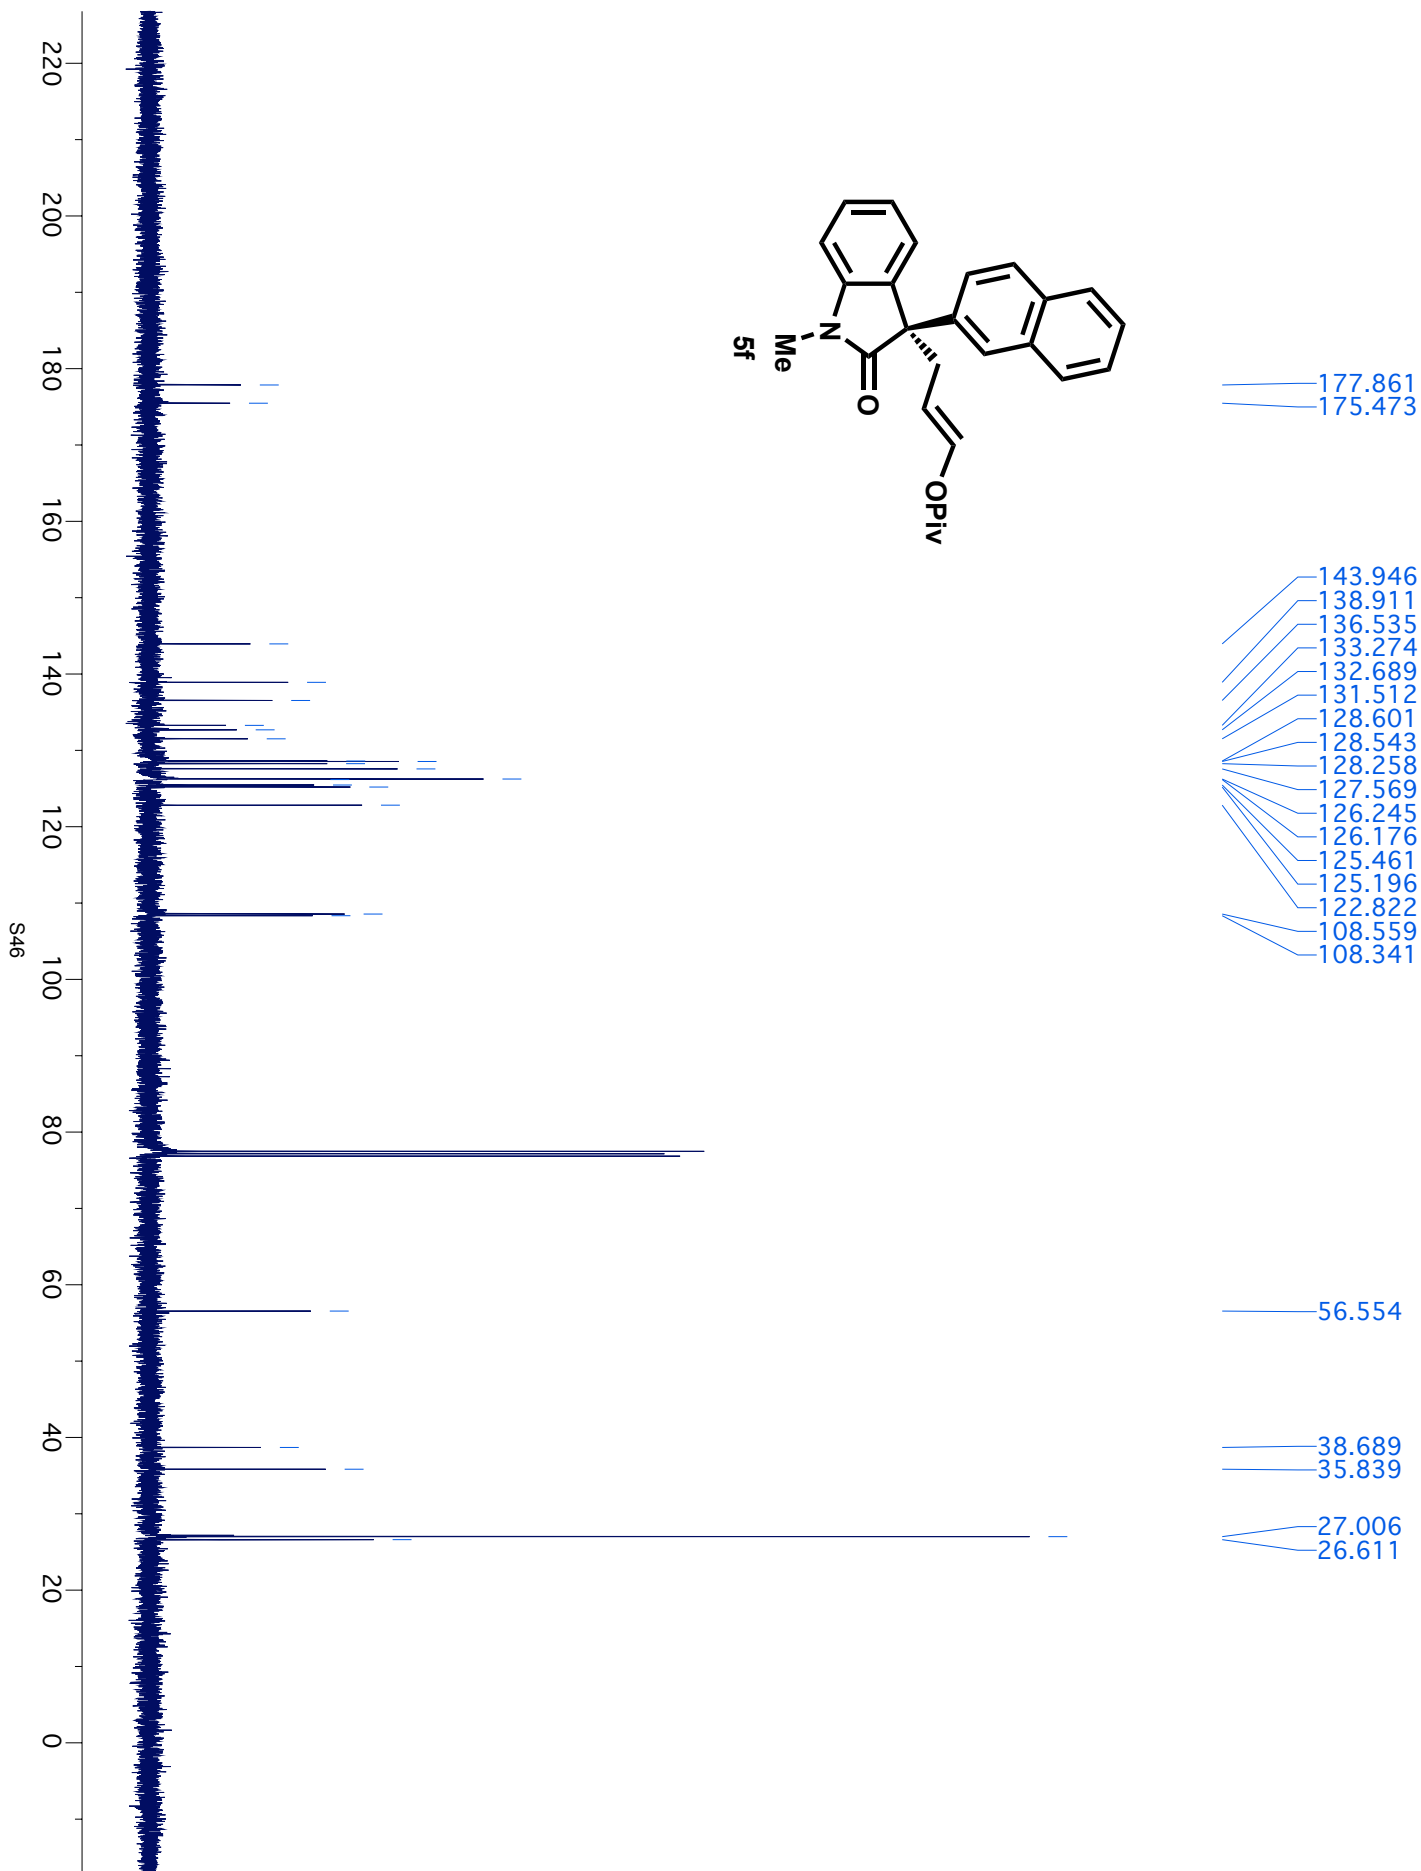

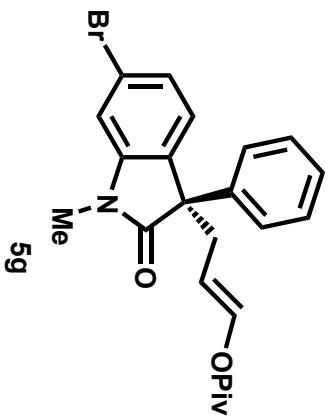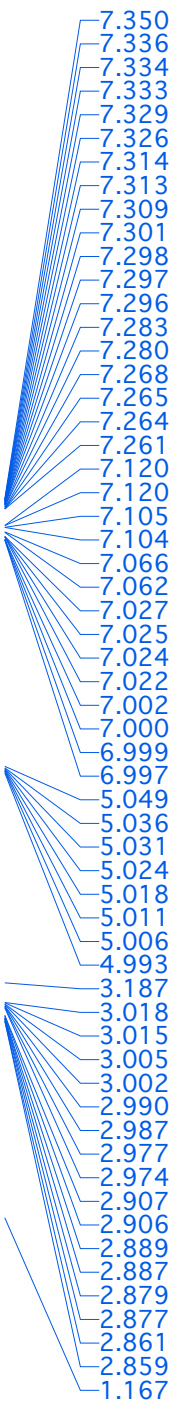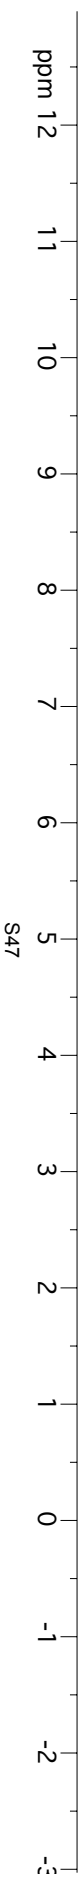

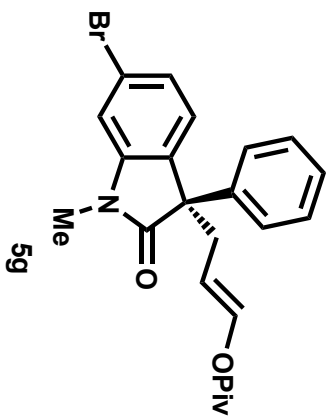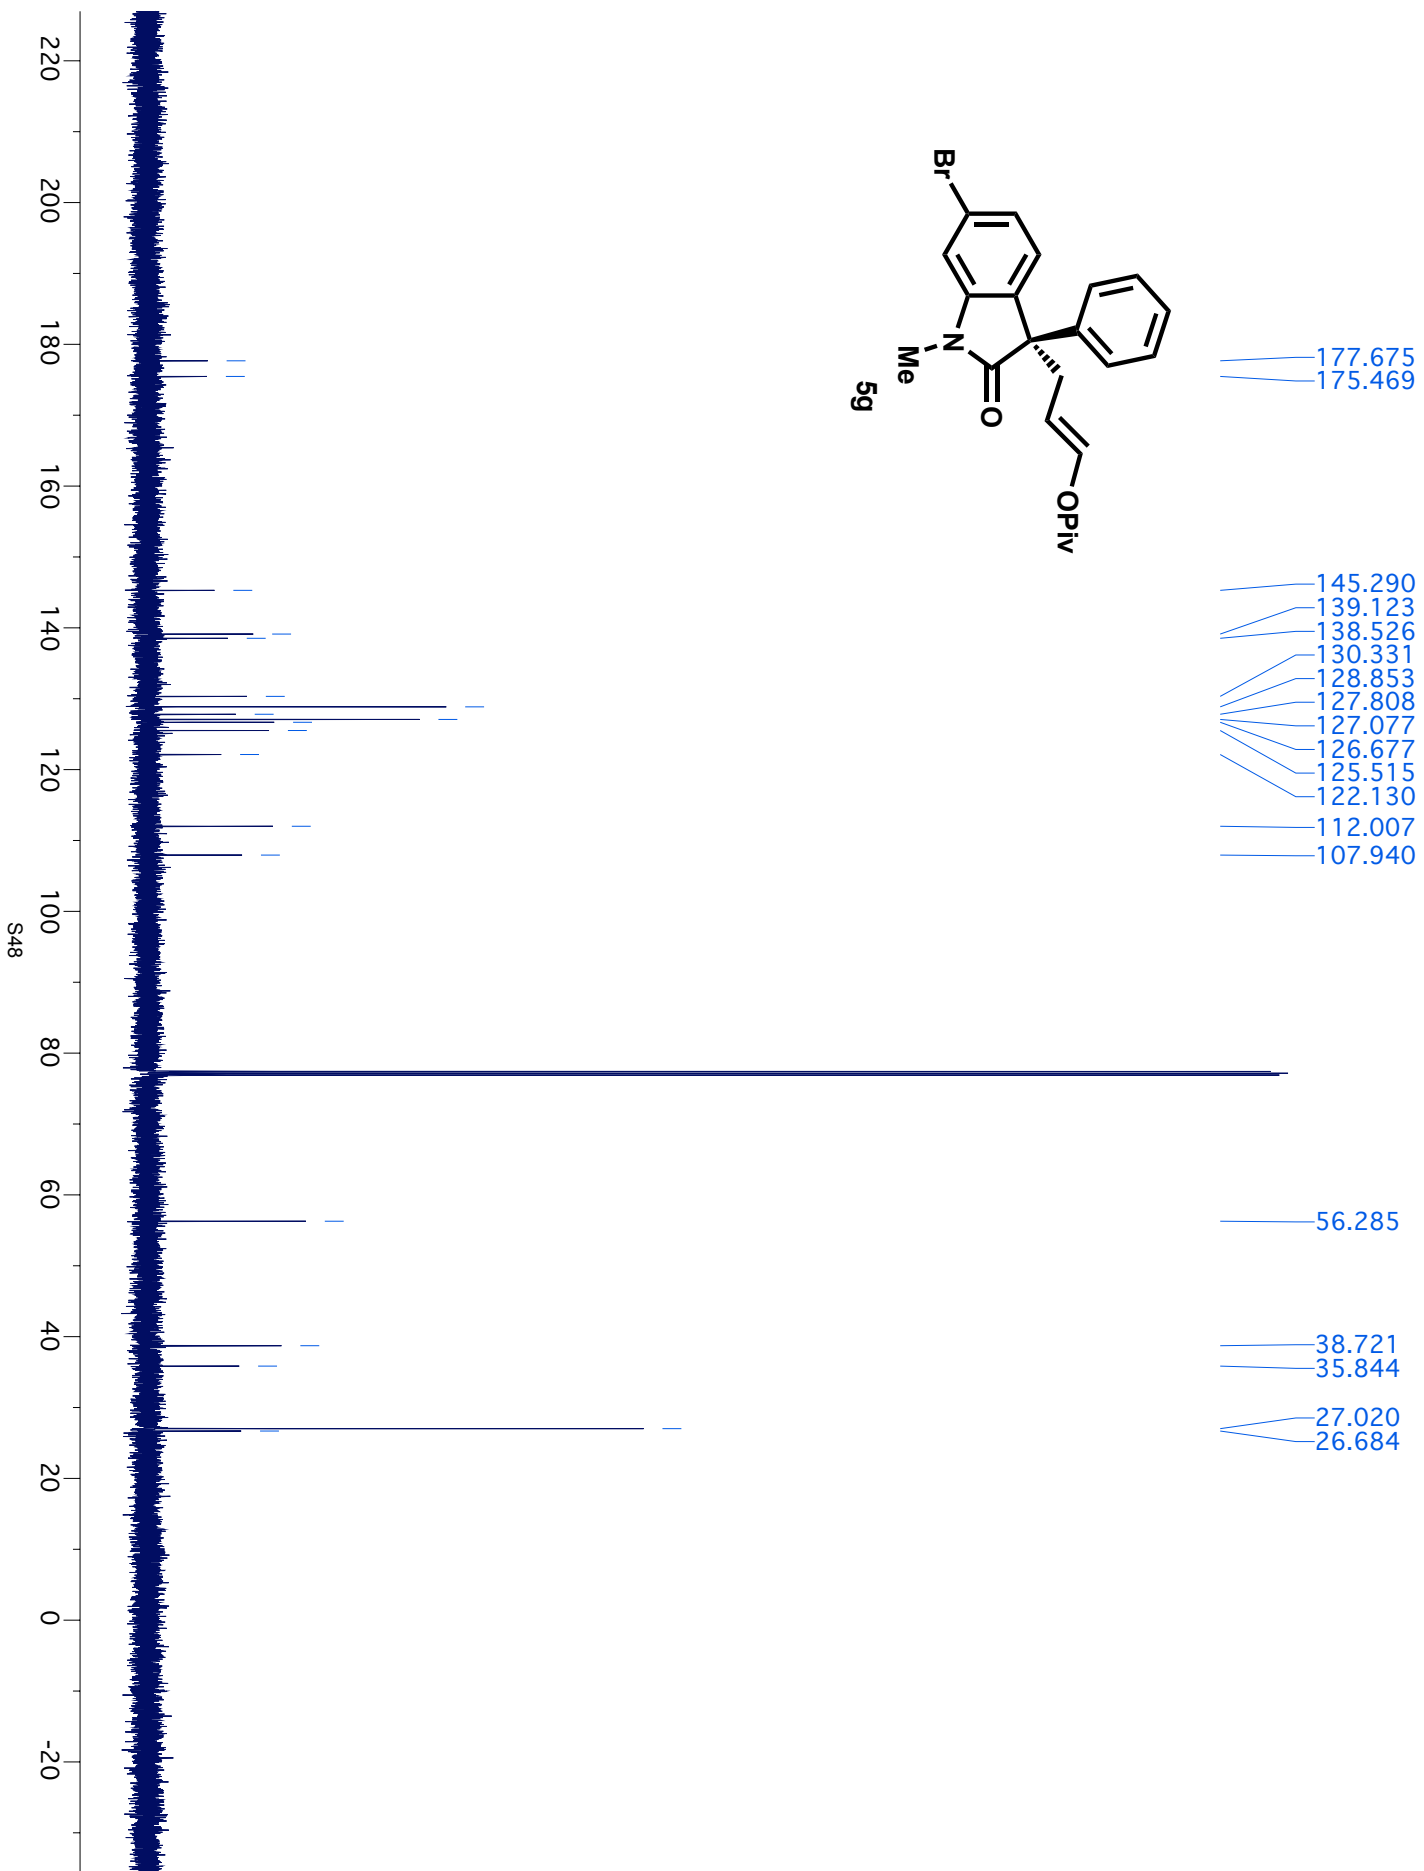

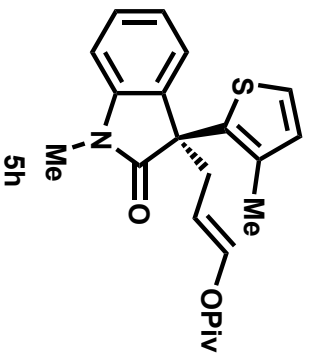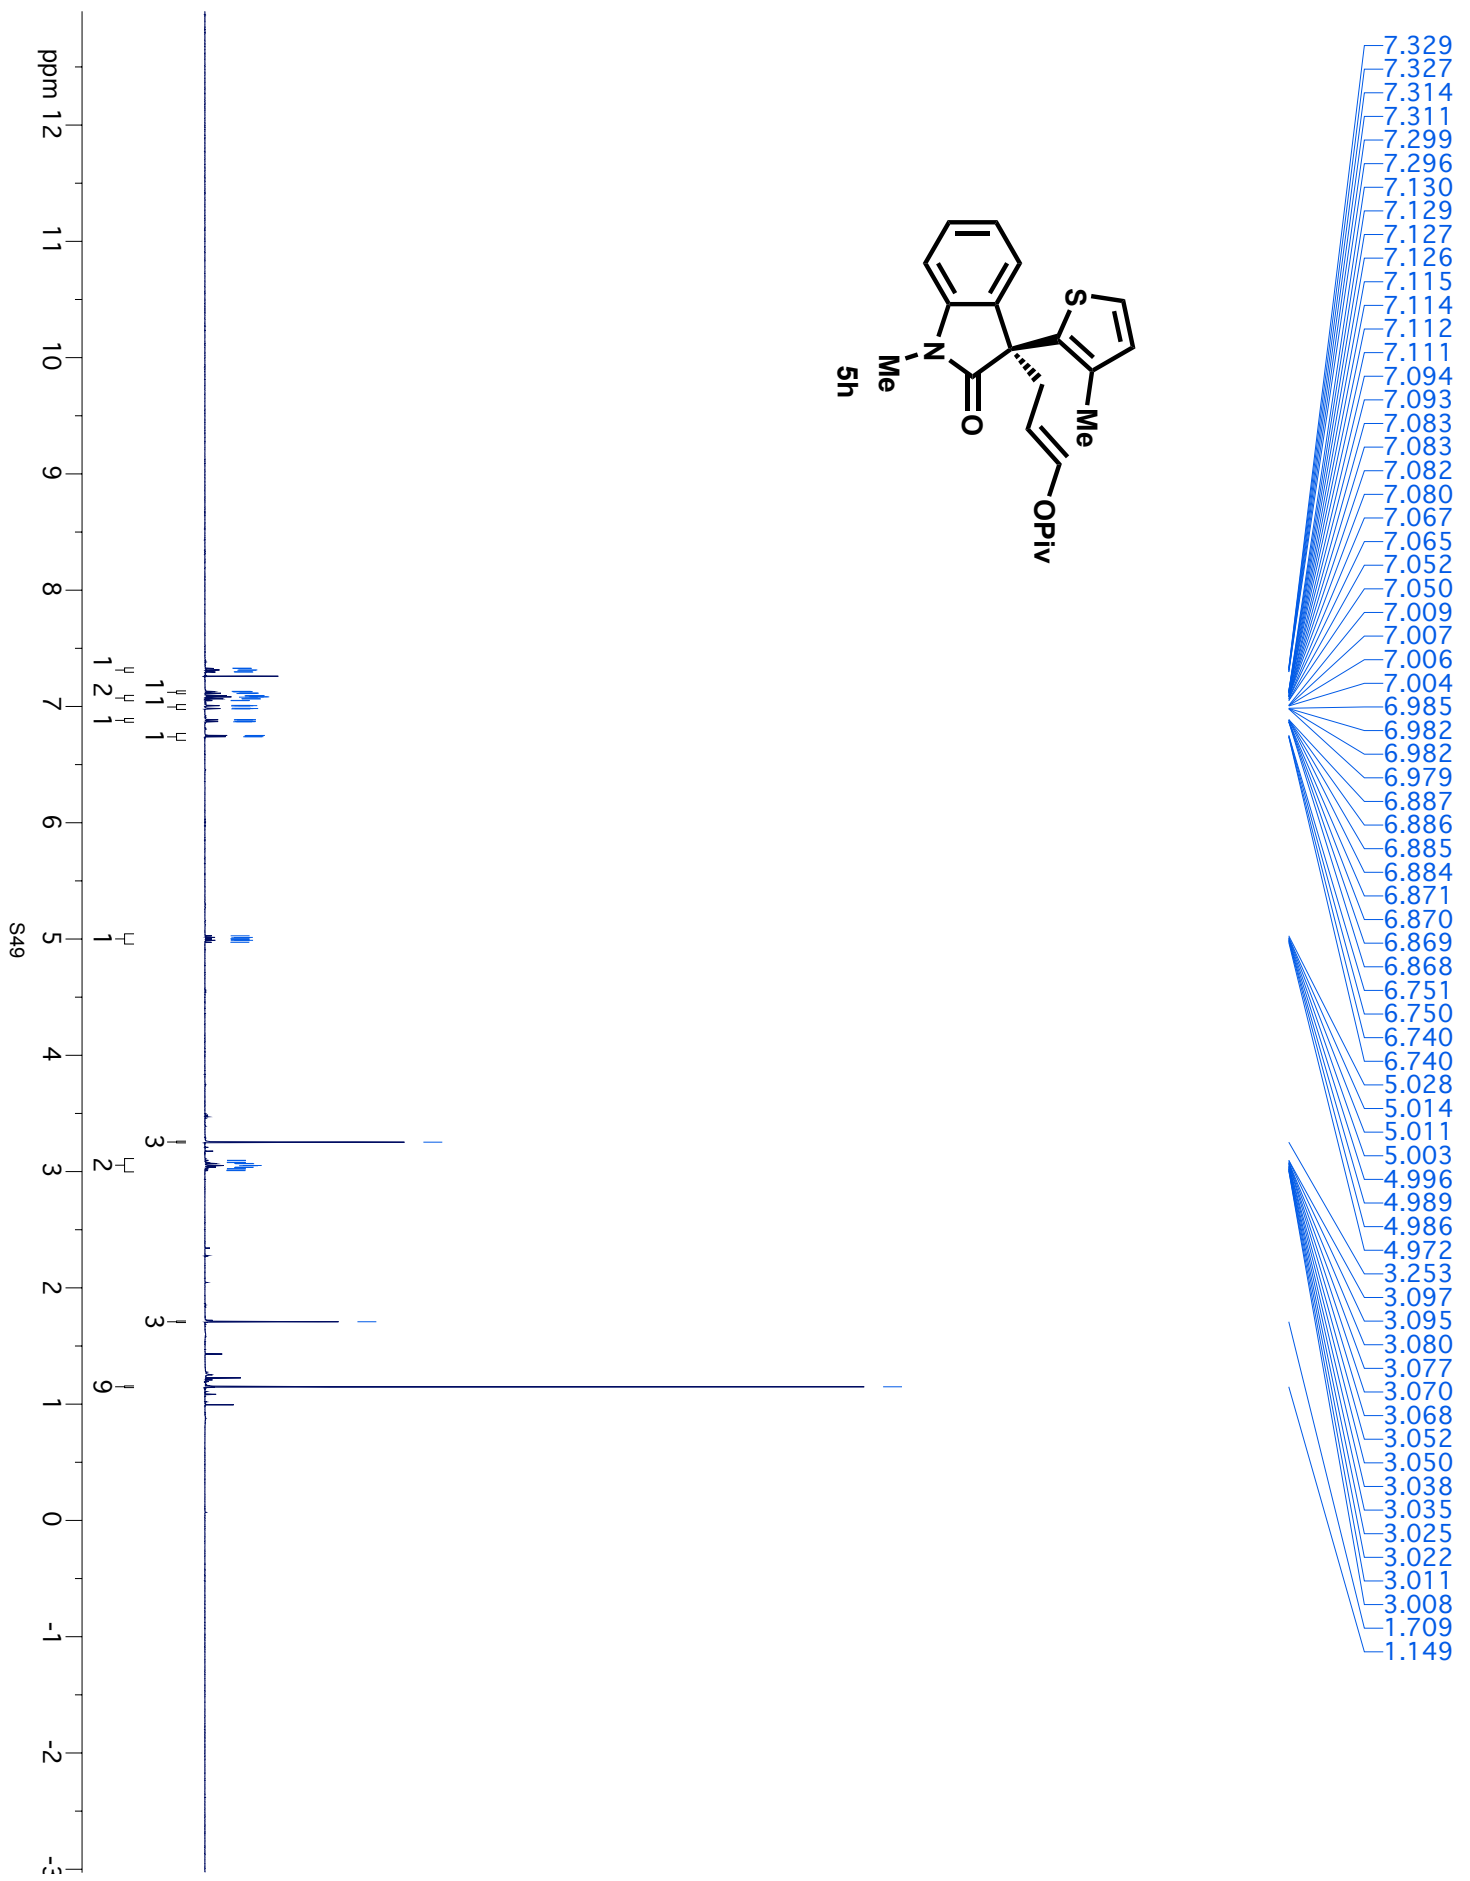



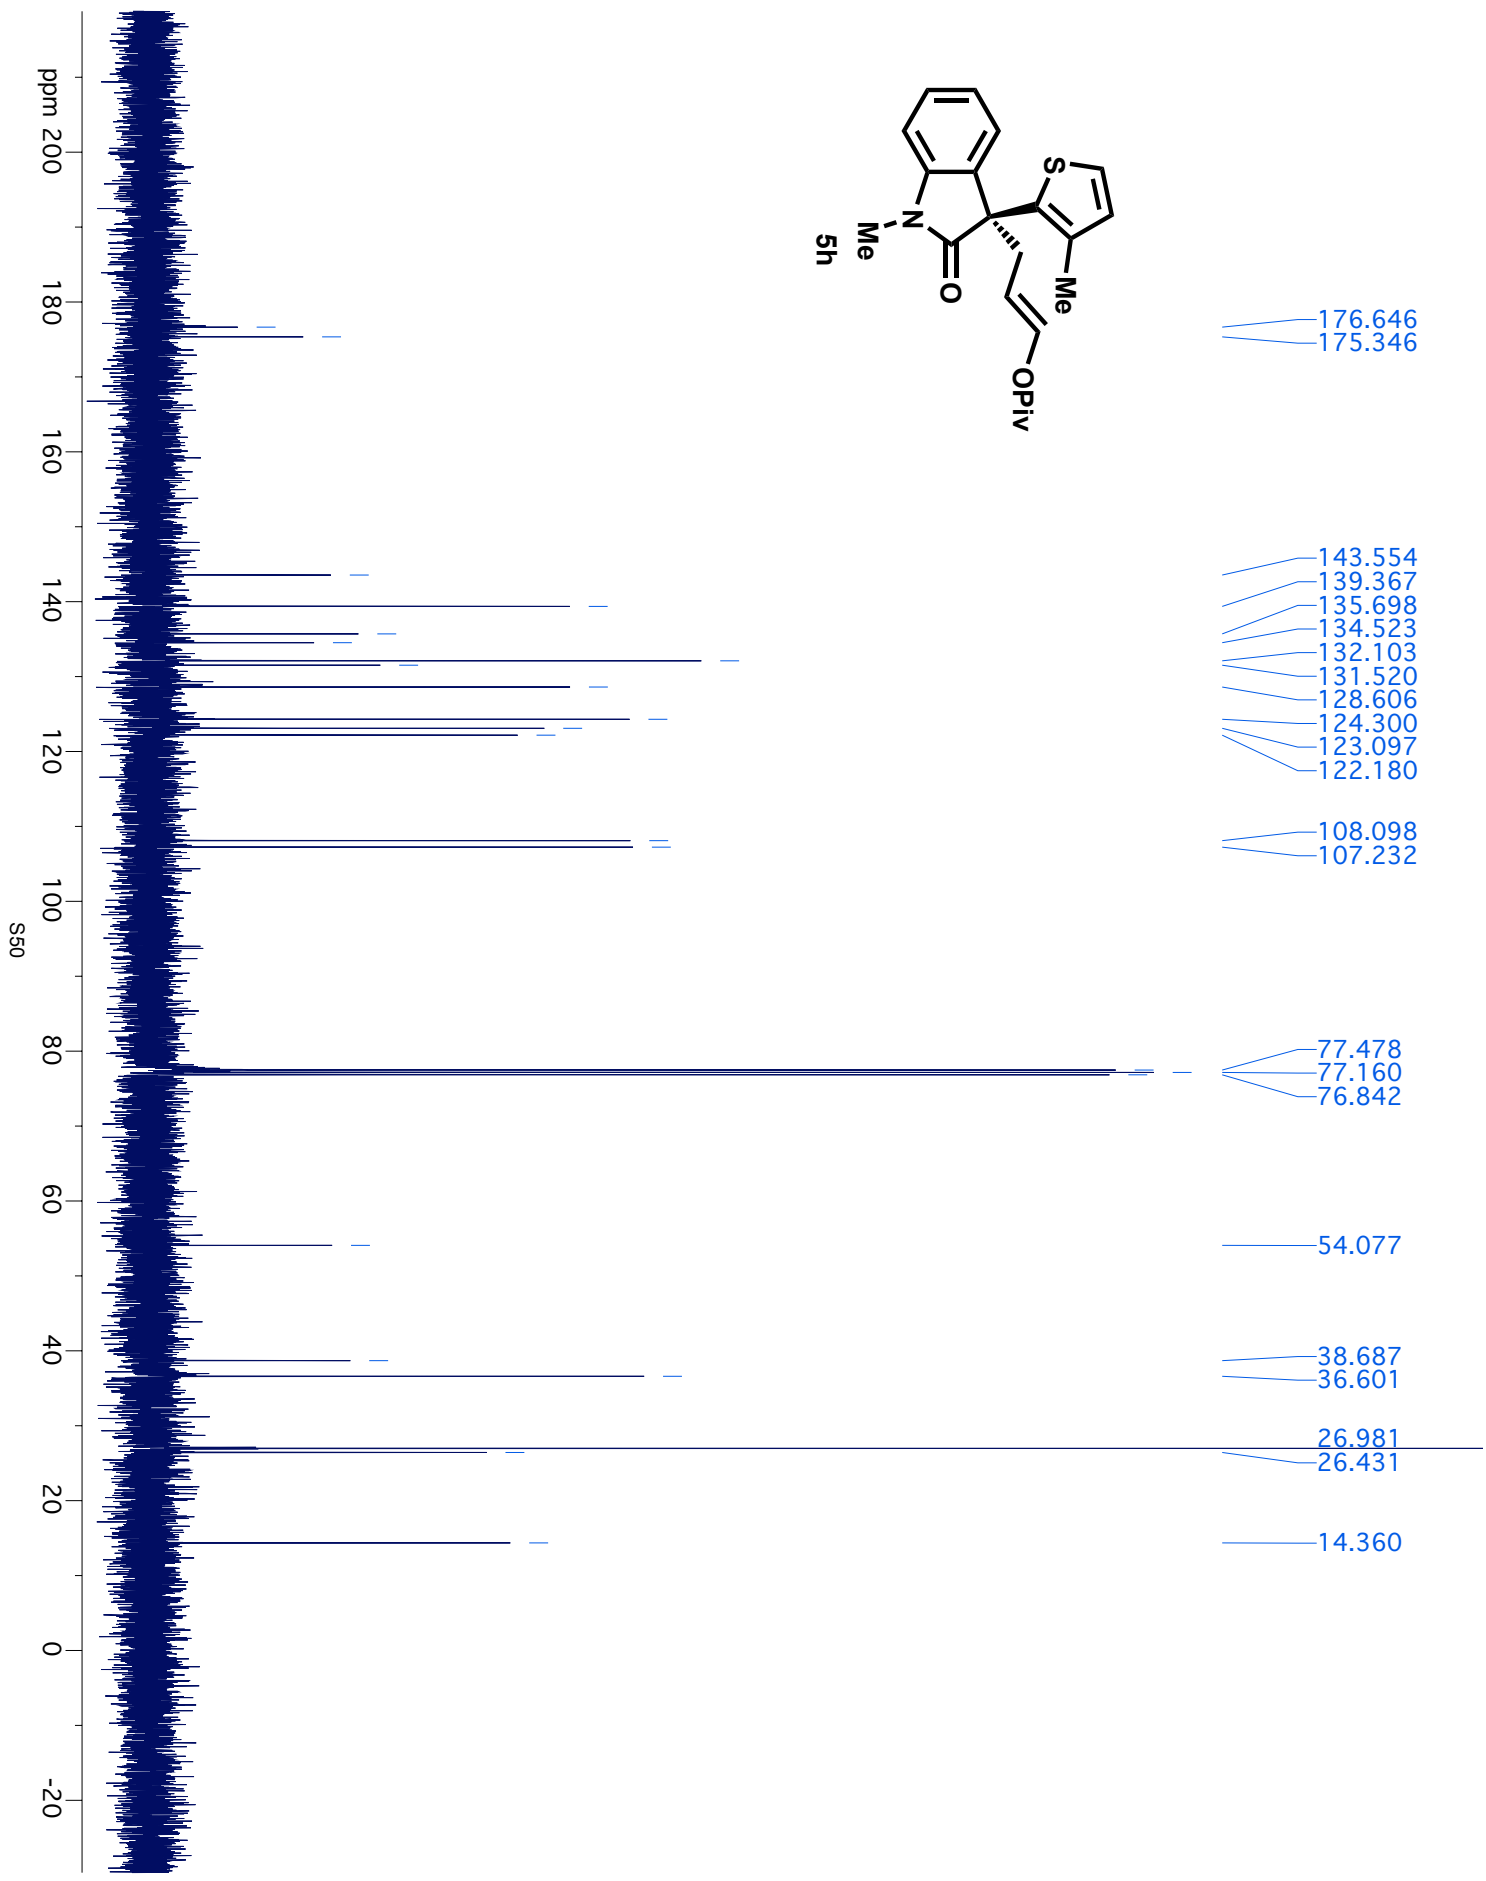

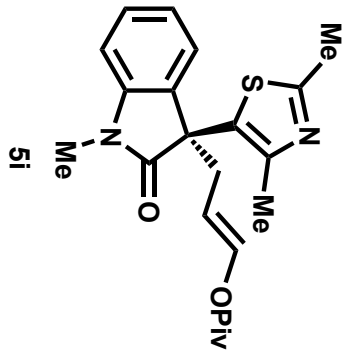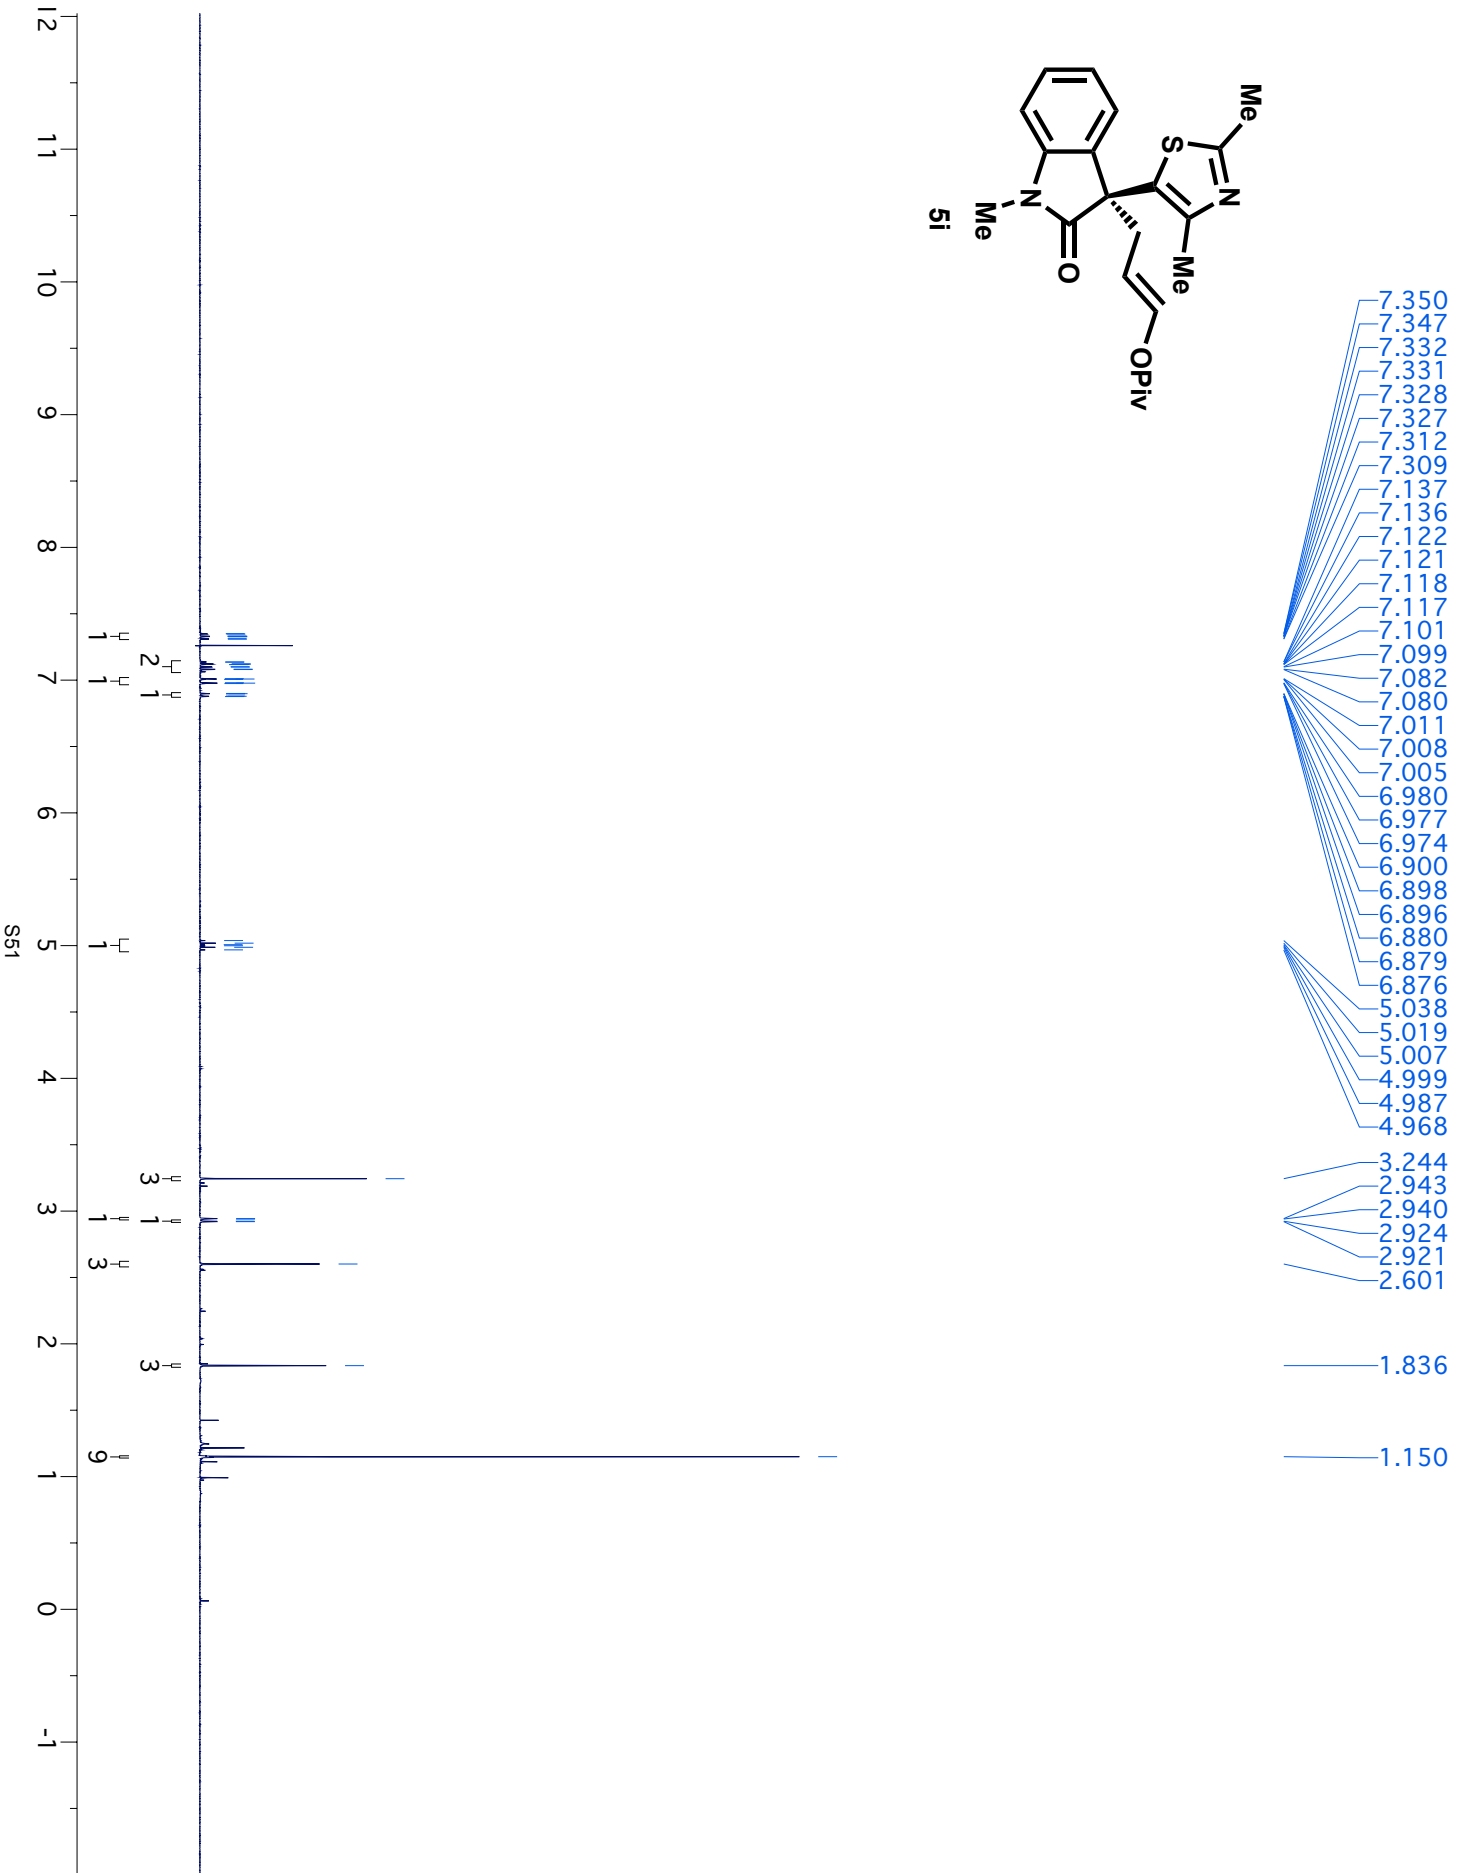

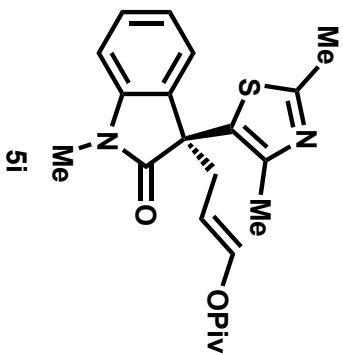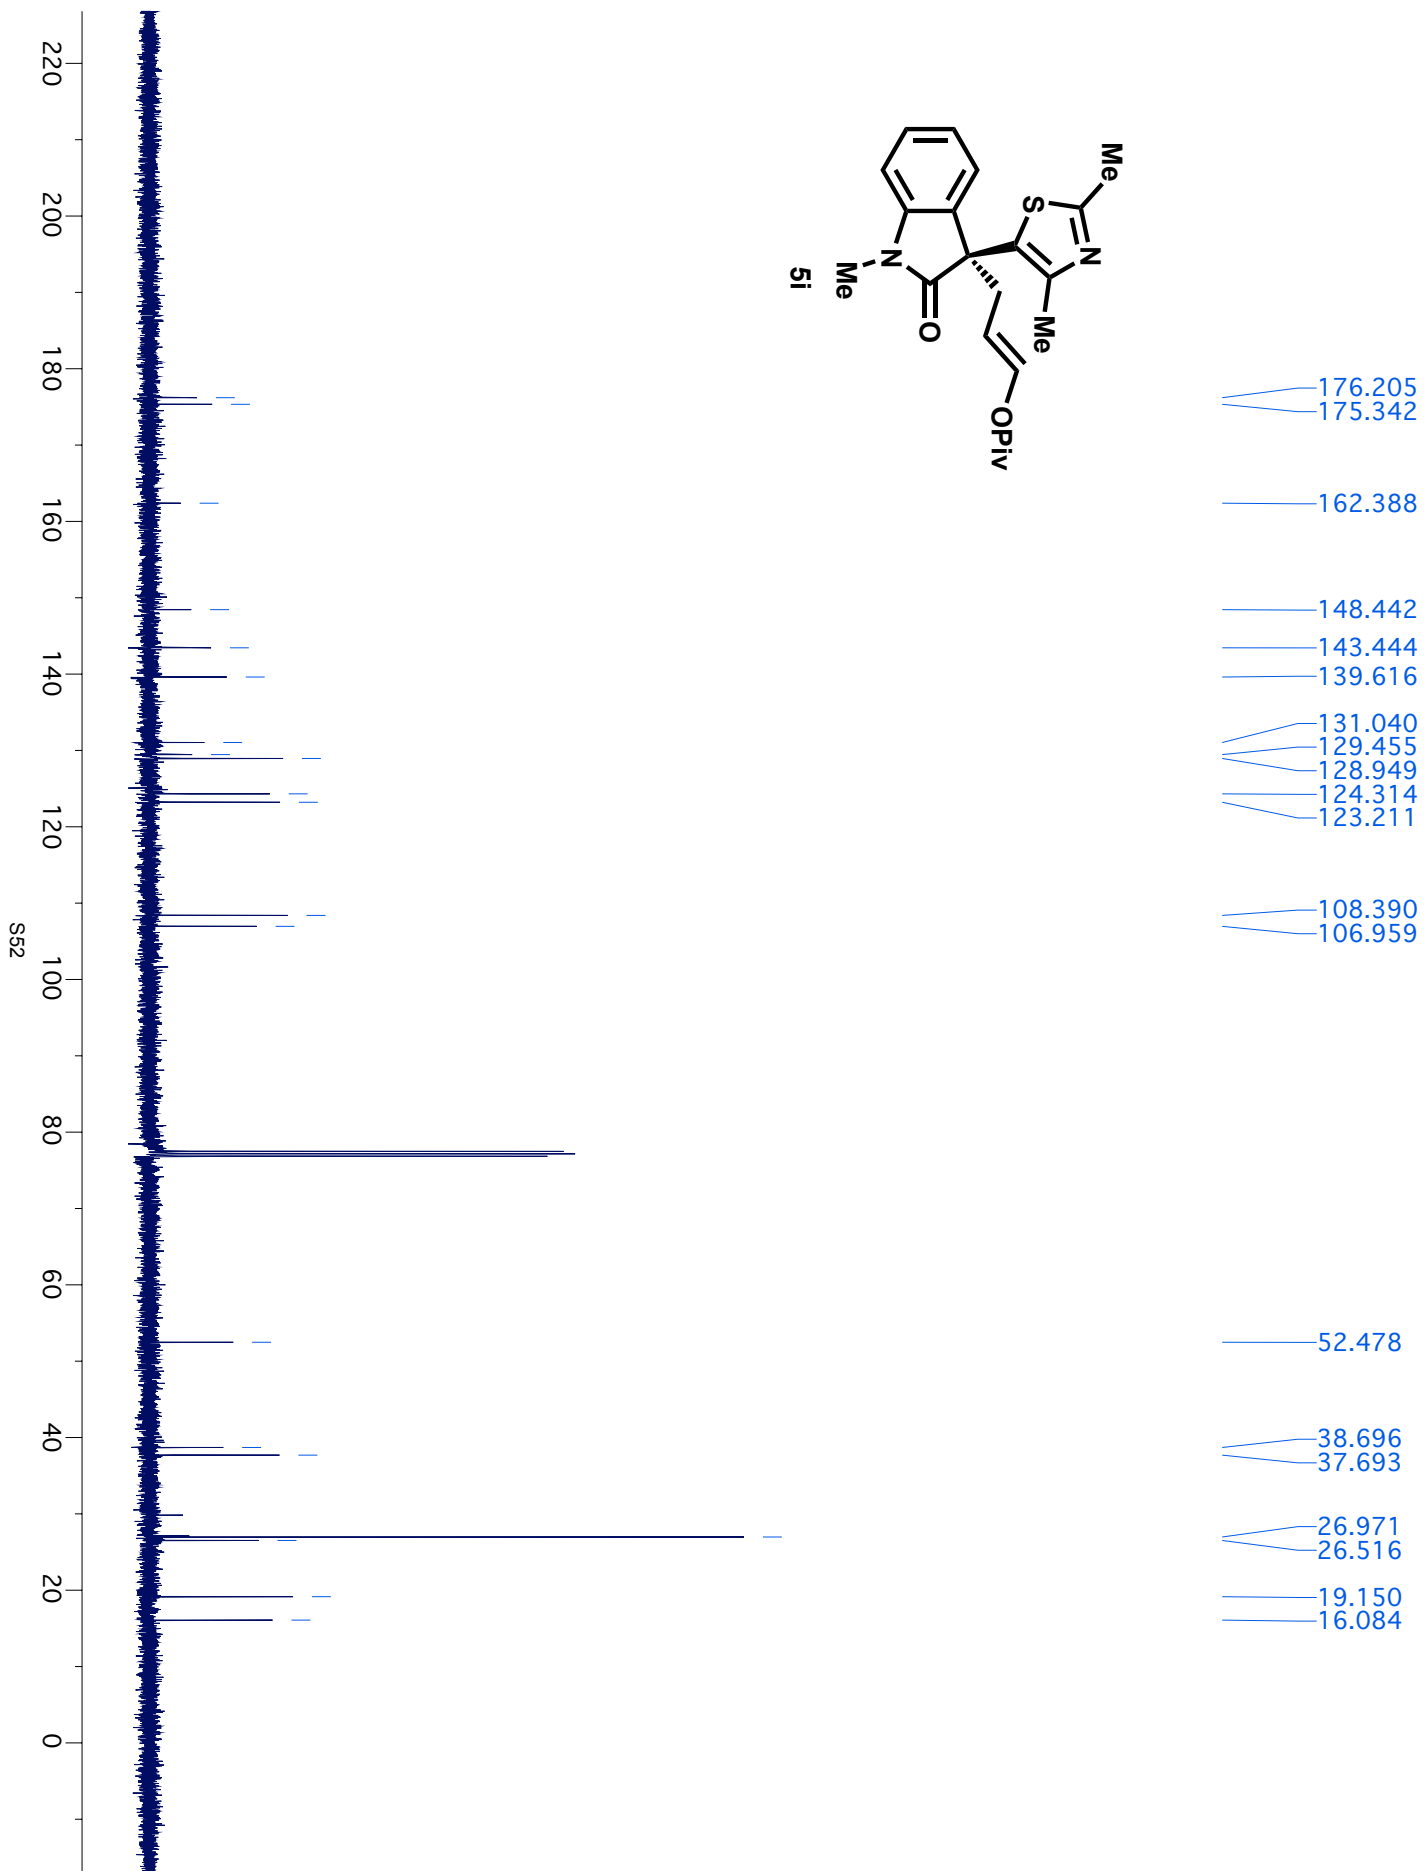

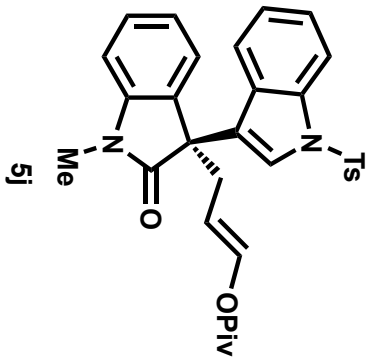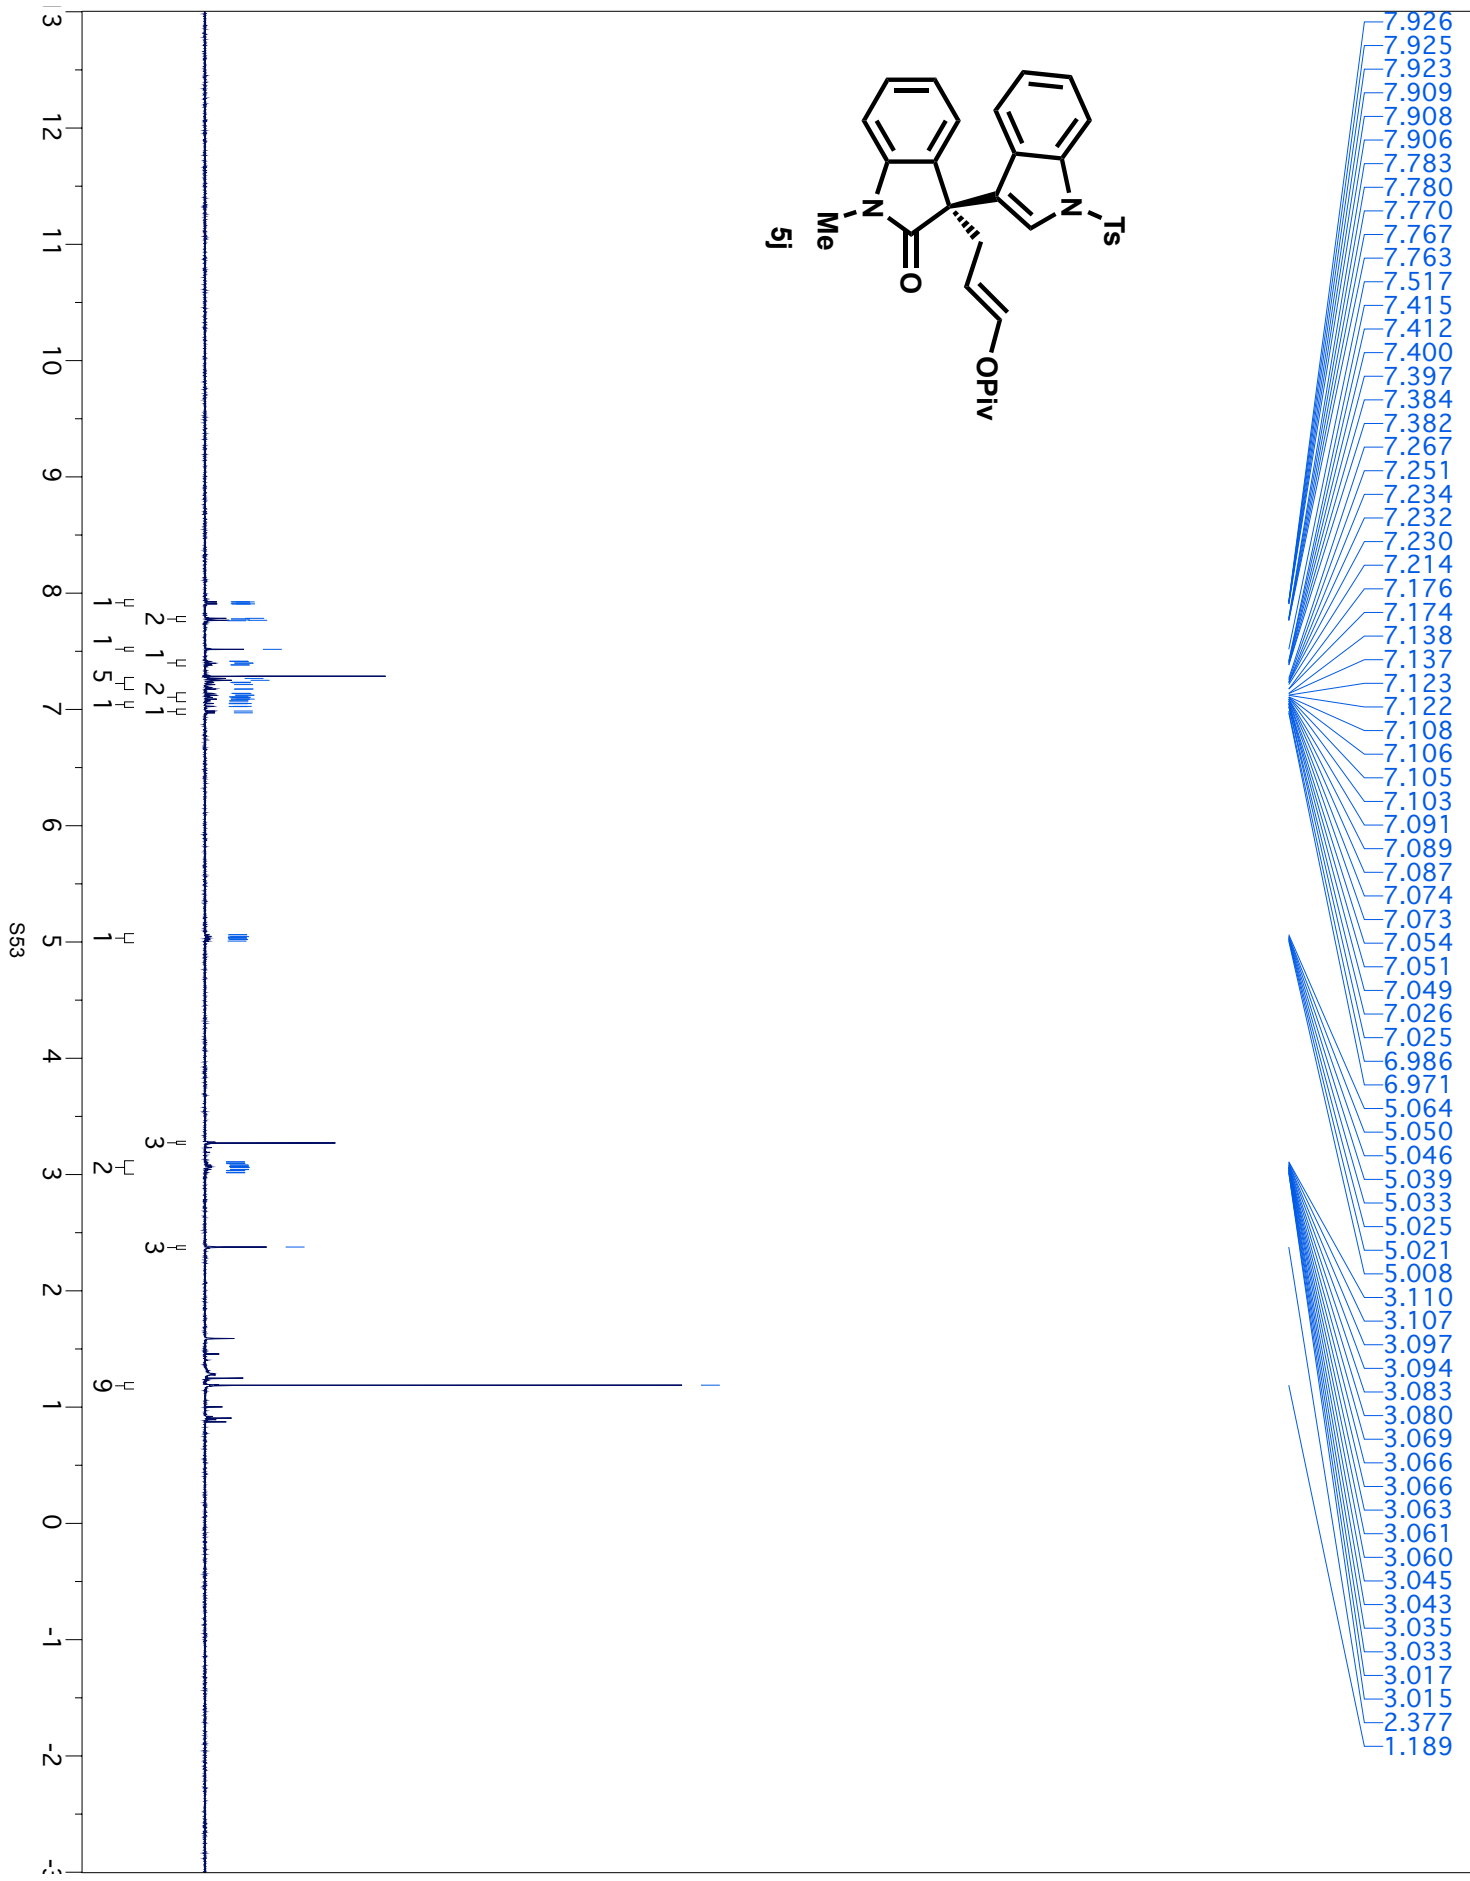

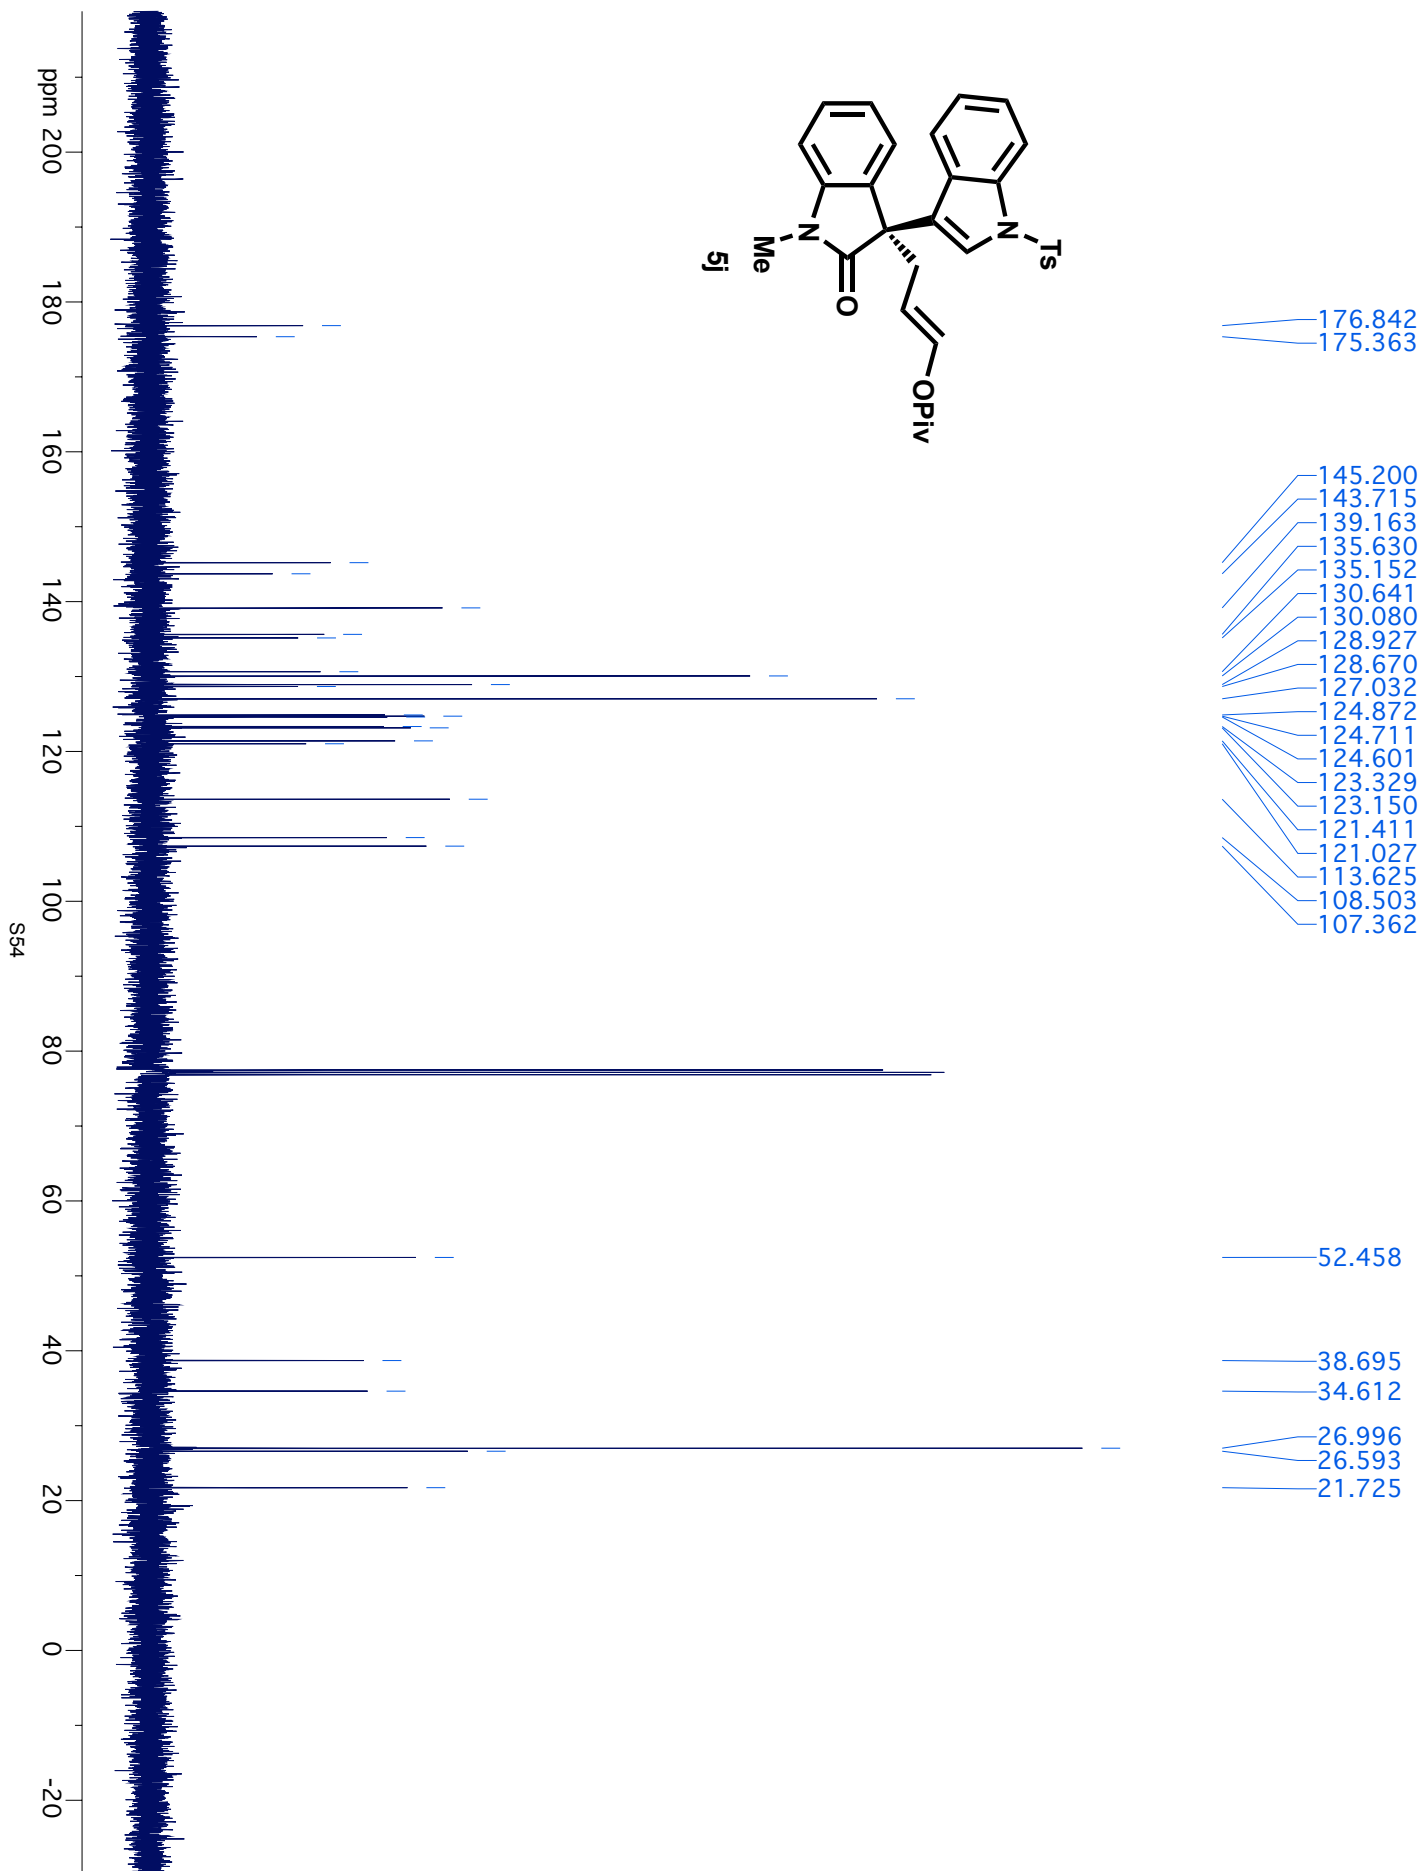

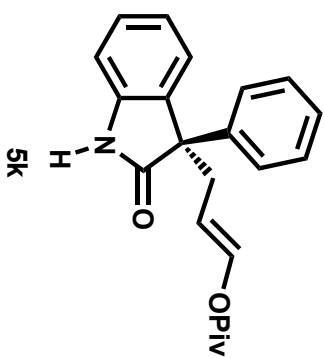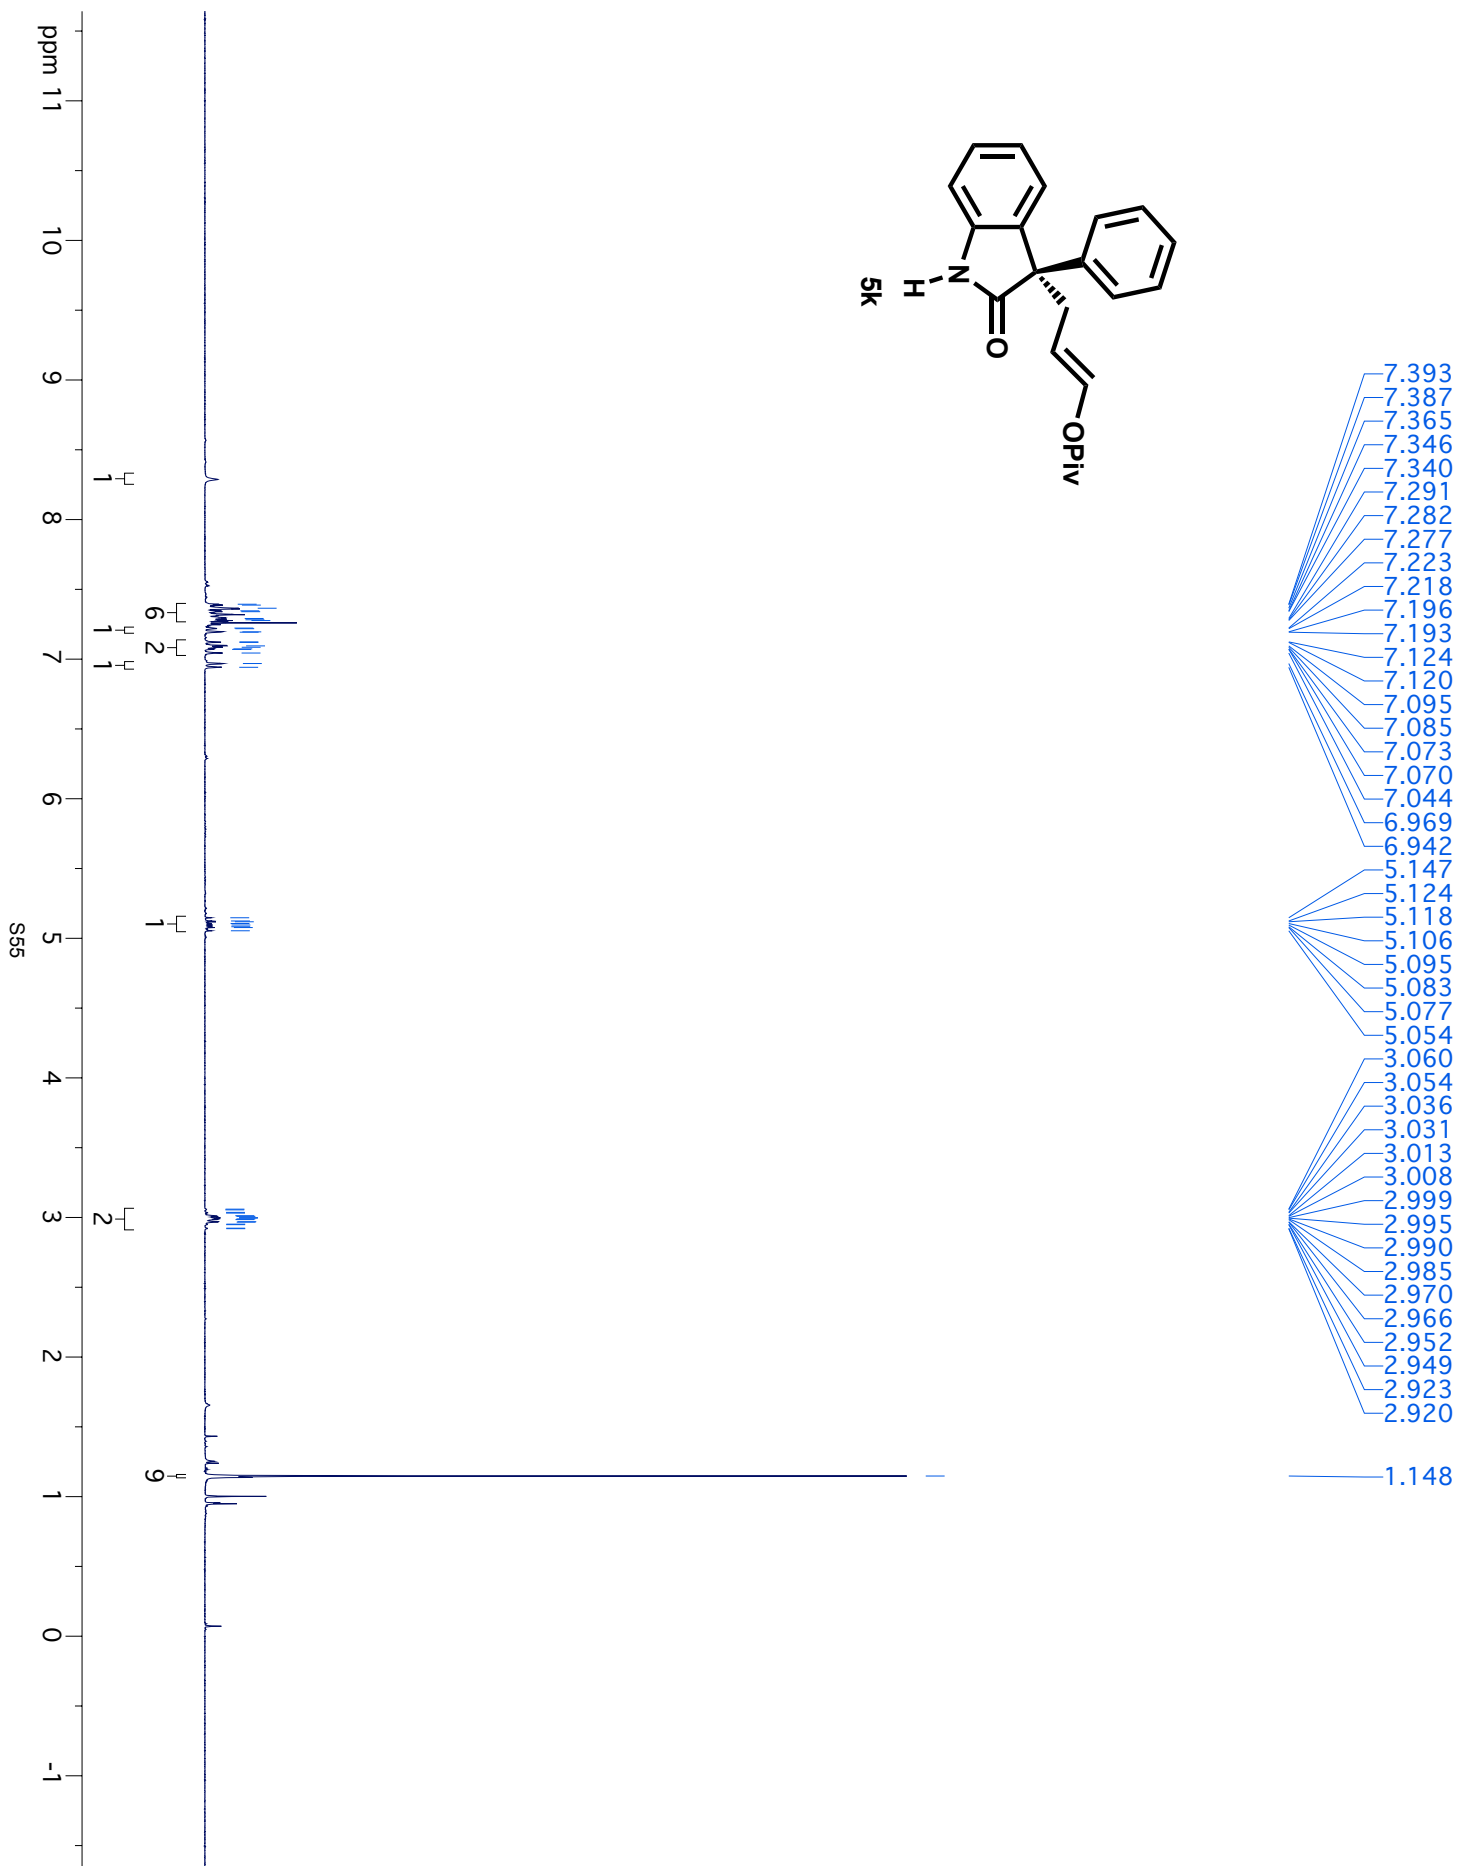

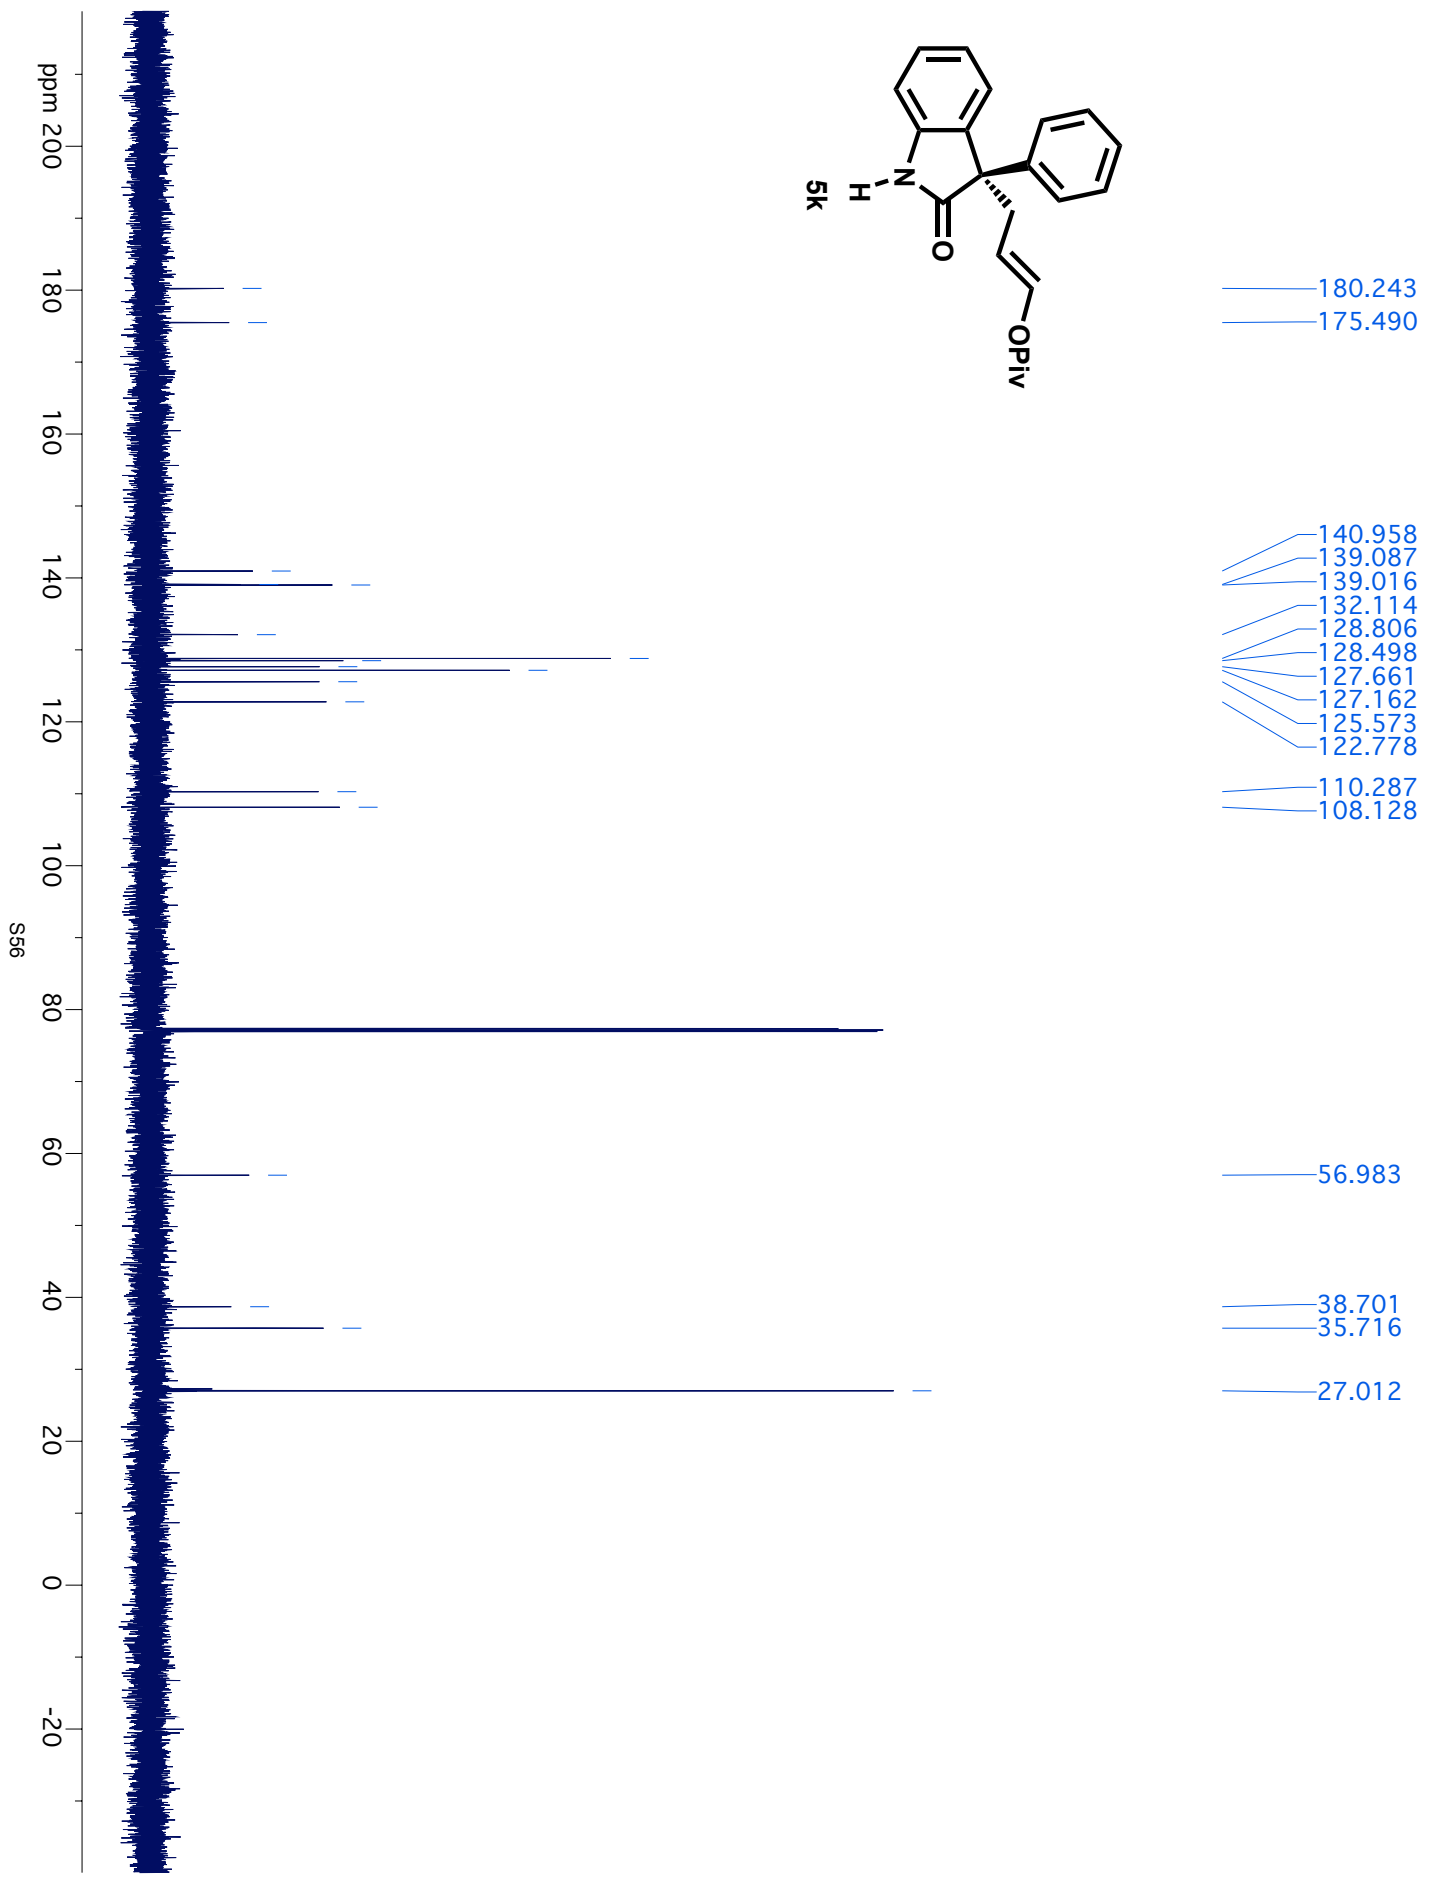

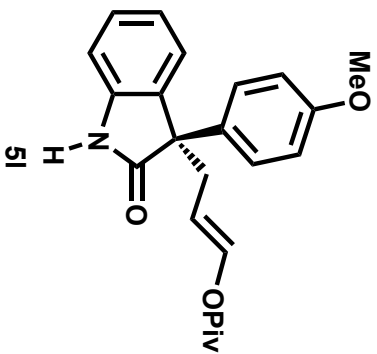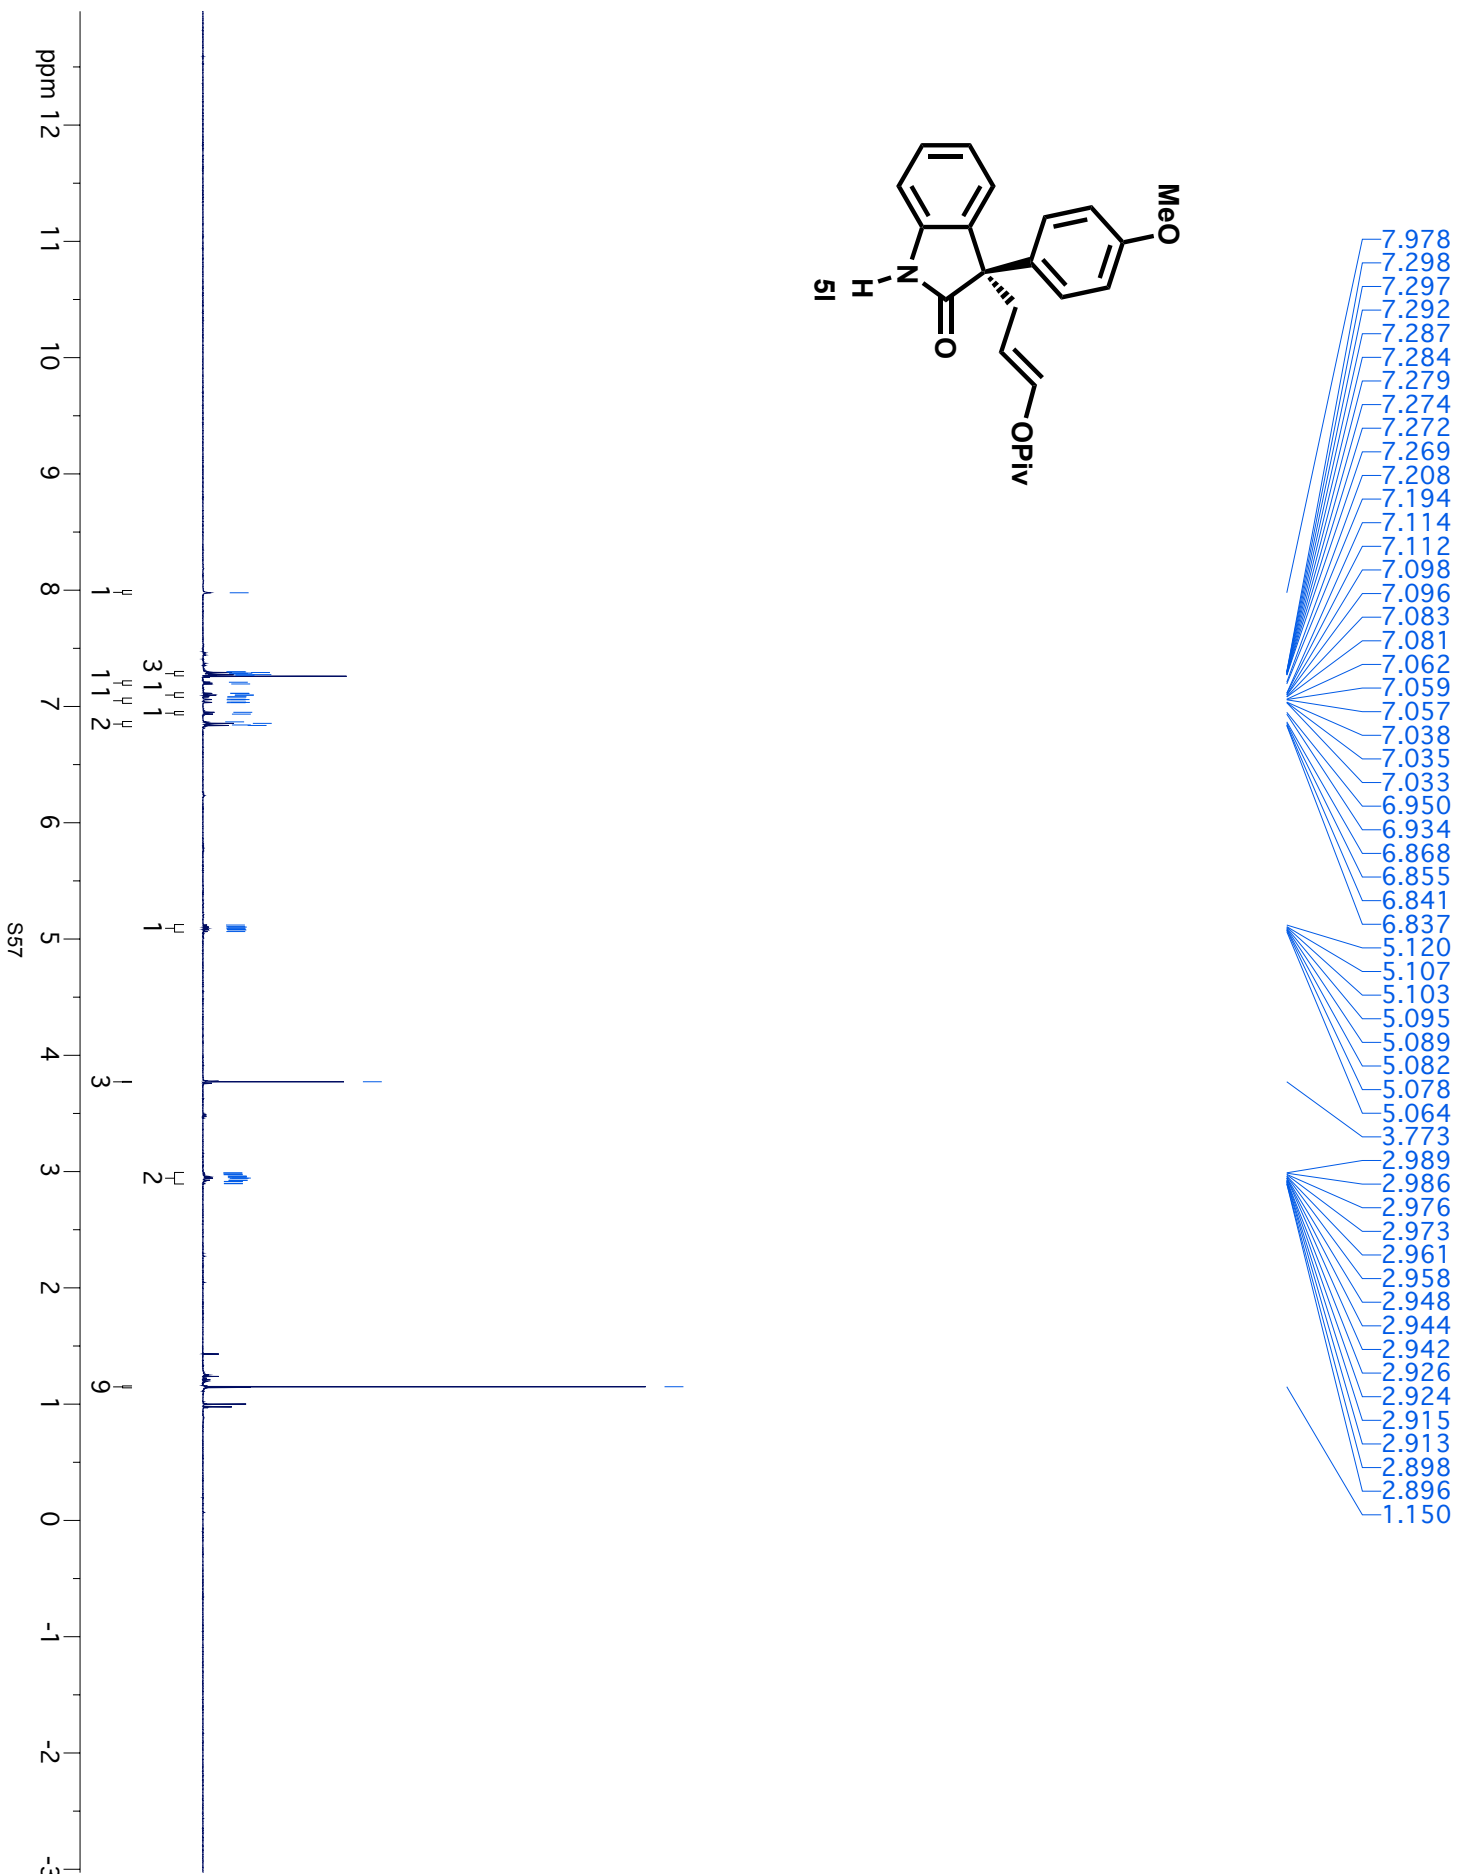



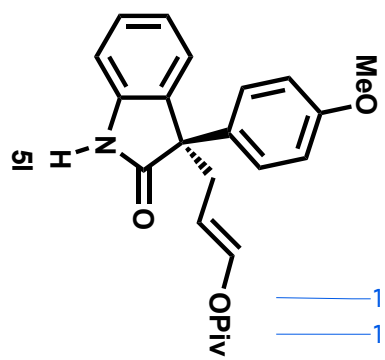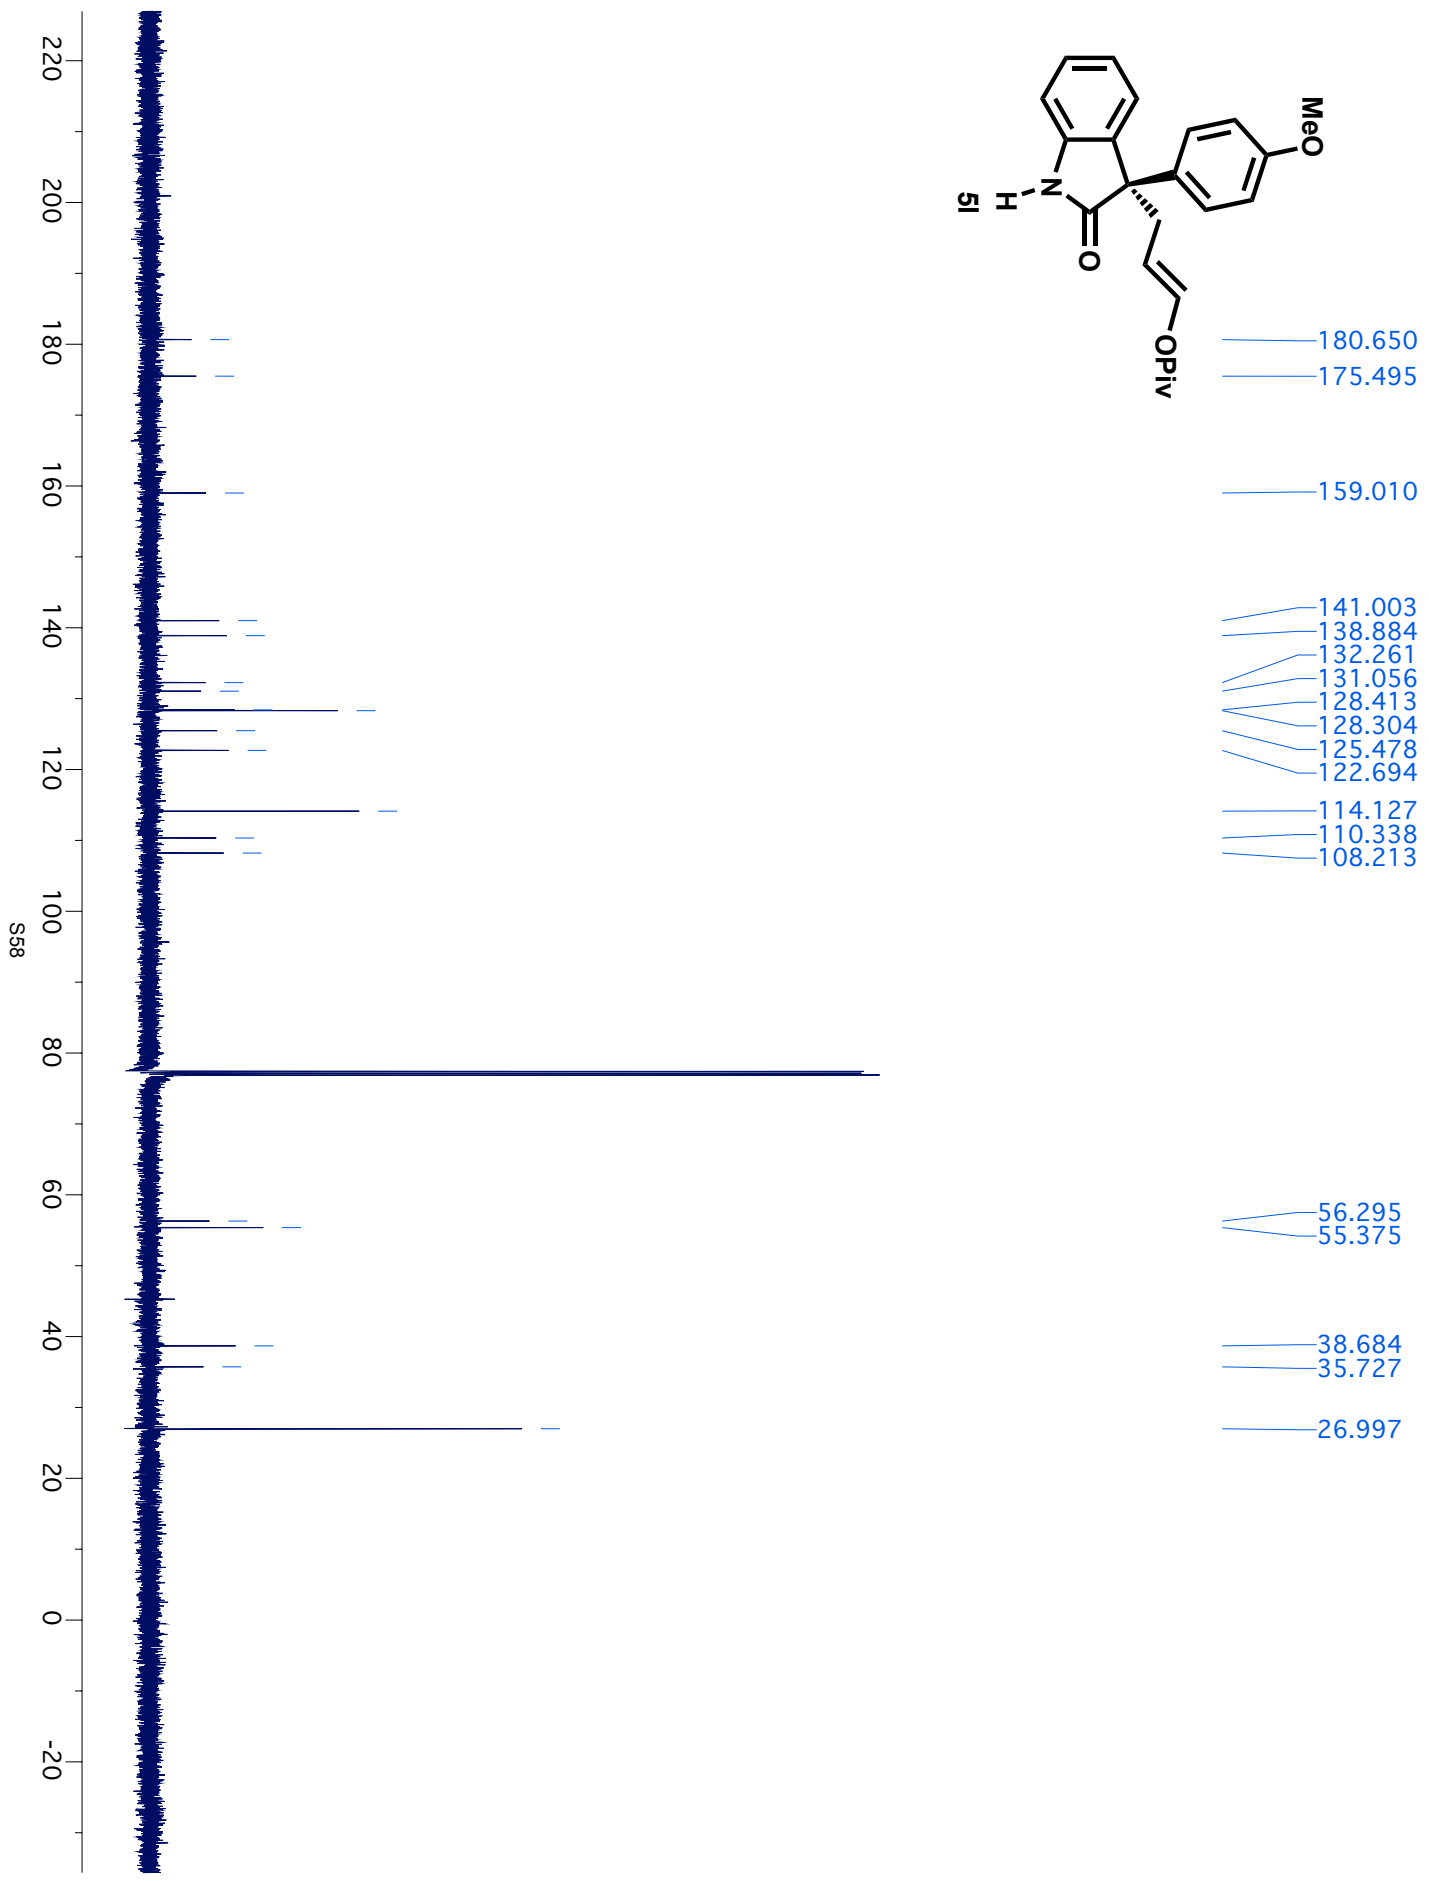

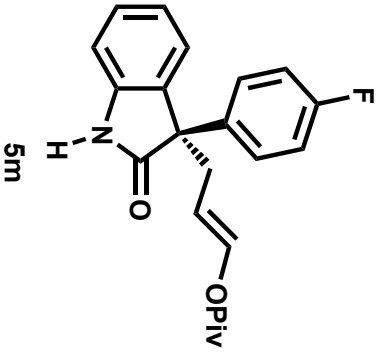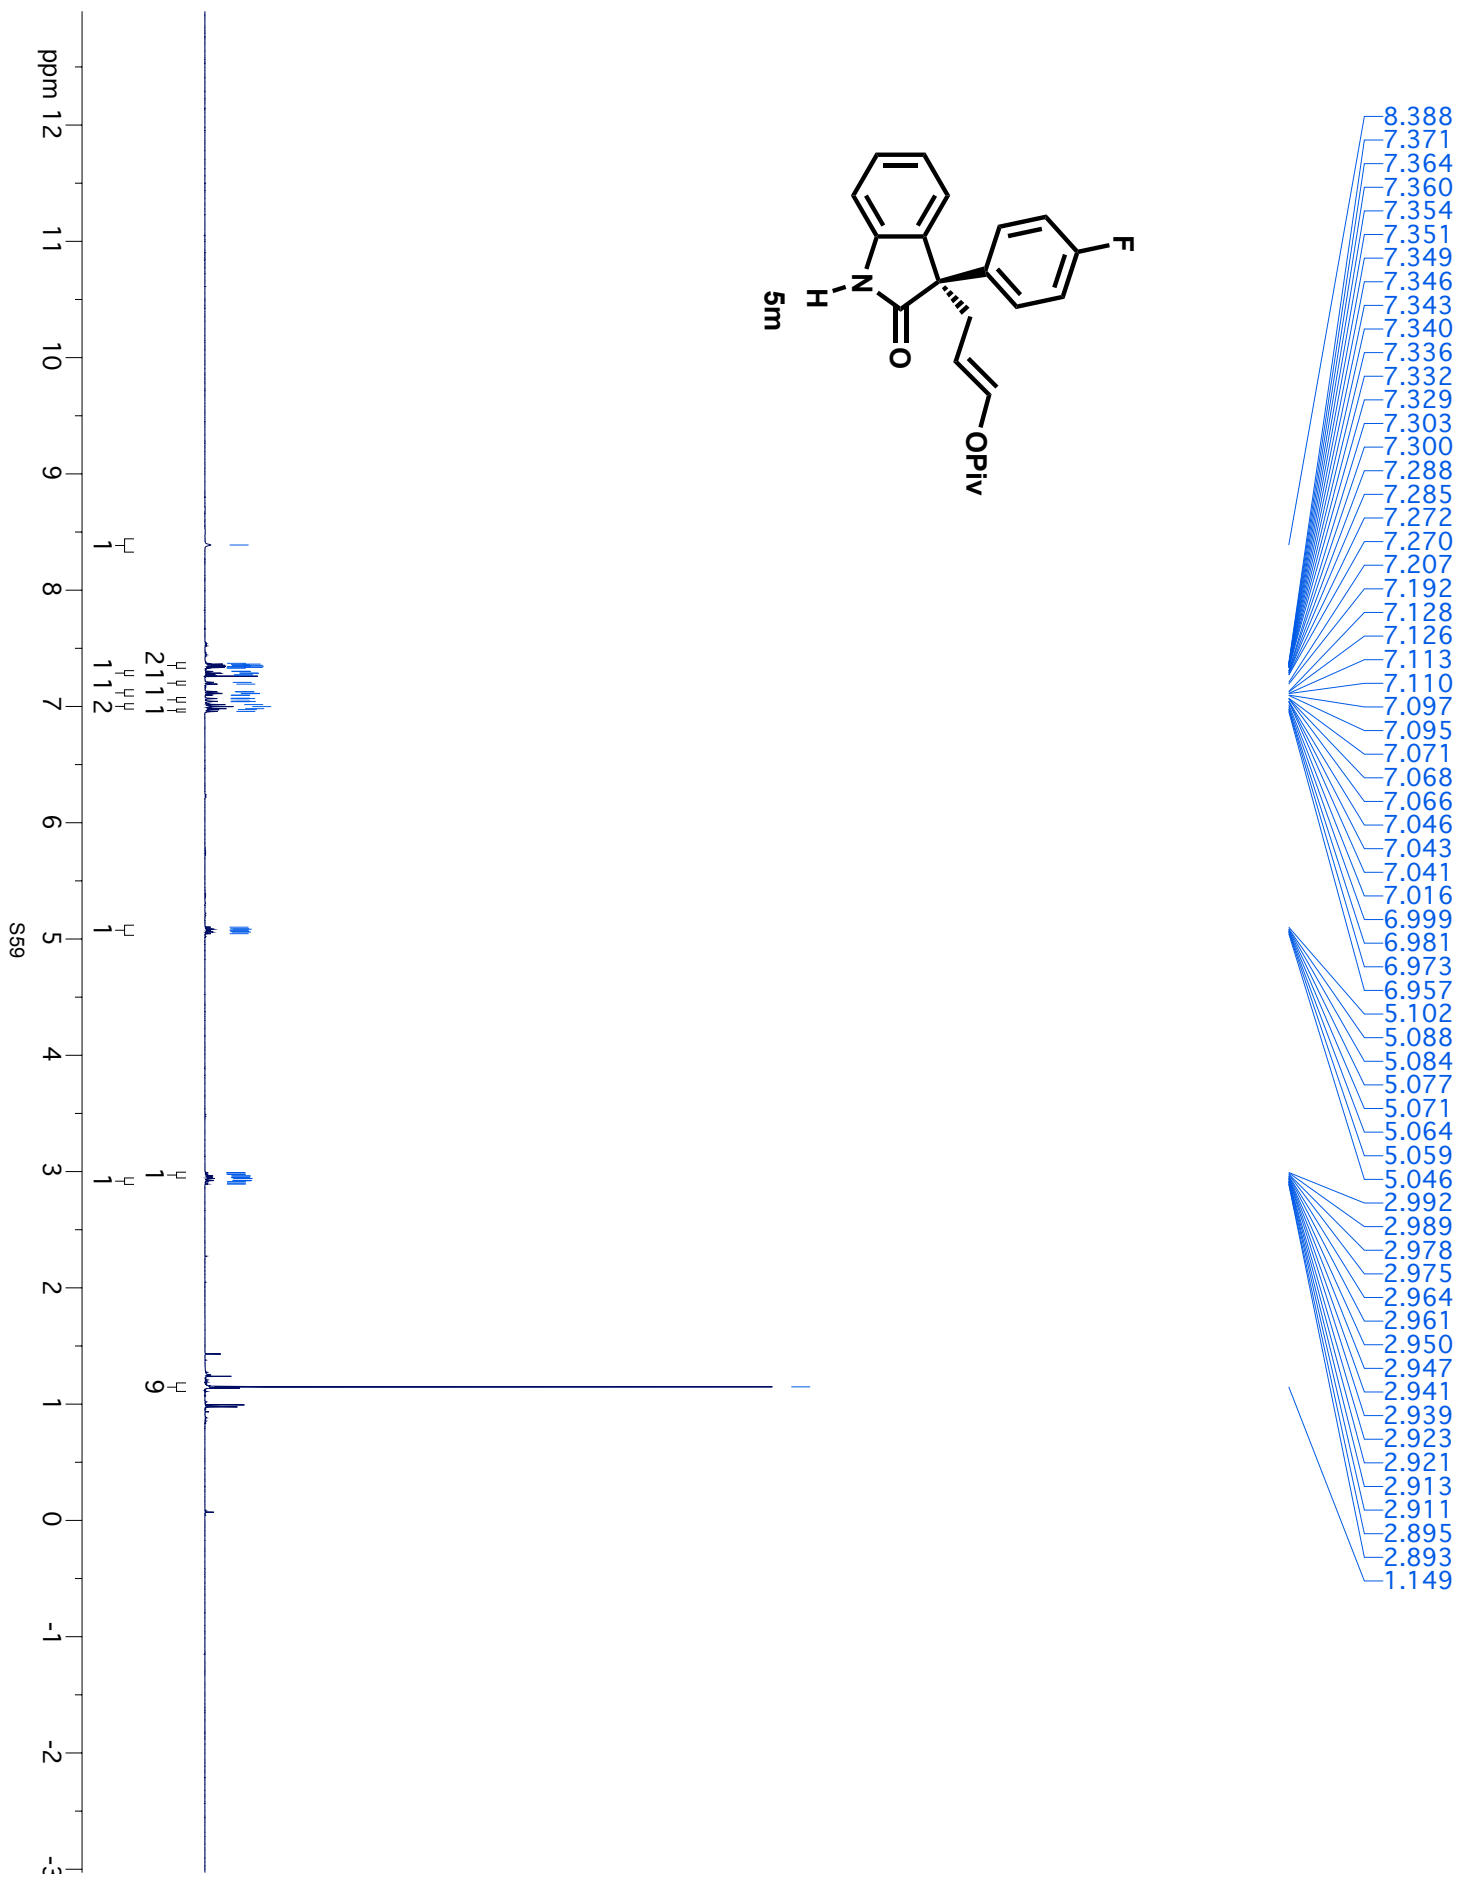

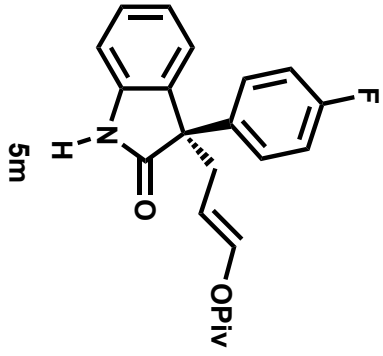

180.208  
175.484

140.942  
139.098  
131.752  
128.978  
128.914  
128.675  
125.510  
122.858  
115.696  
115.526  
110.487  
107.859

56.357

38.700  
36.007

26.988

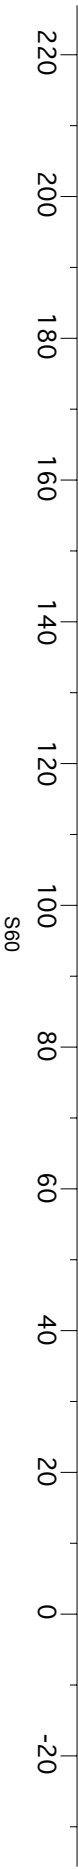

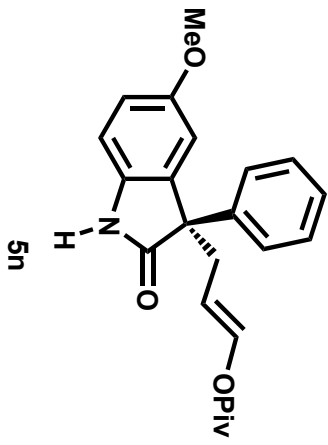

- 8.237
- 7.378
- 7.374
- 7.359
- 7.357
- 7.353
- 7.341
- 7.338
- 7.322
- 7.320
- 7.316
- 7.301
- 7.285
- 7.281
- 7.264
- 7.106
- 7.103
- 7.100
- 7.075
- 7.072
- 7.069
- 6.880
- 6.879
- 6.864
- 6.860
- 6.858
- 6.822
- 6.816
- 6.802
- 6.795
- 6.791
- 6.785
- 5.146
- 5.130
- 5.124
- 5.115
- 5.107
- 5.099
- 5.093
- 5.076
- 3.771
- 3.036
- 3.033
- 3.020
- 3.016
- 3.001
- 2.998
- 2.985
- 2.979
- 2.976
- 2.956
- 2.954
- 2.943
- 2.941
- 2.921
- 2.919
- 1.151

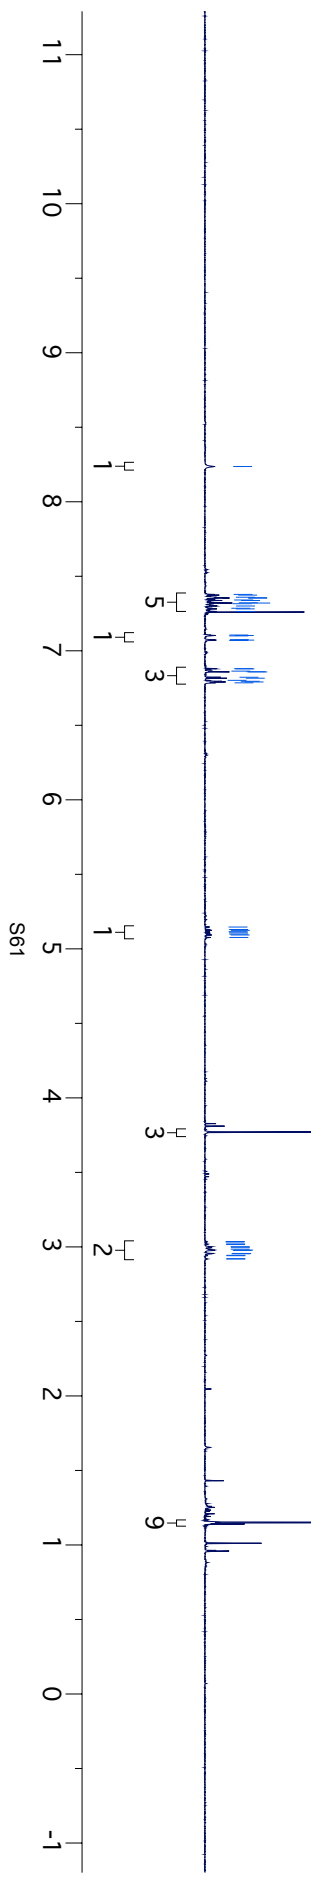

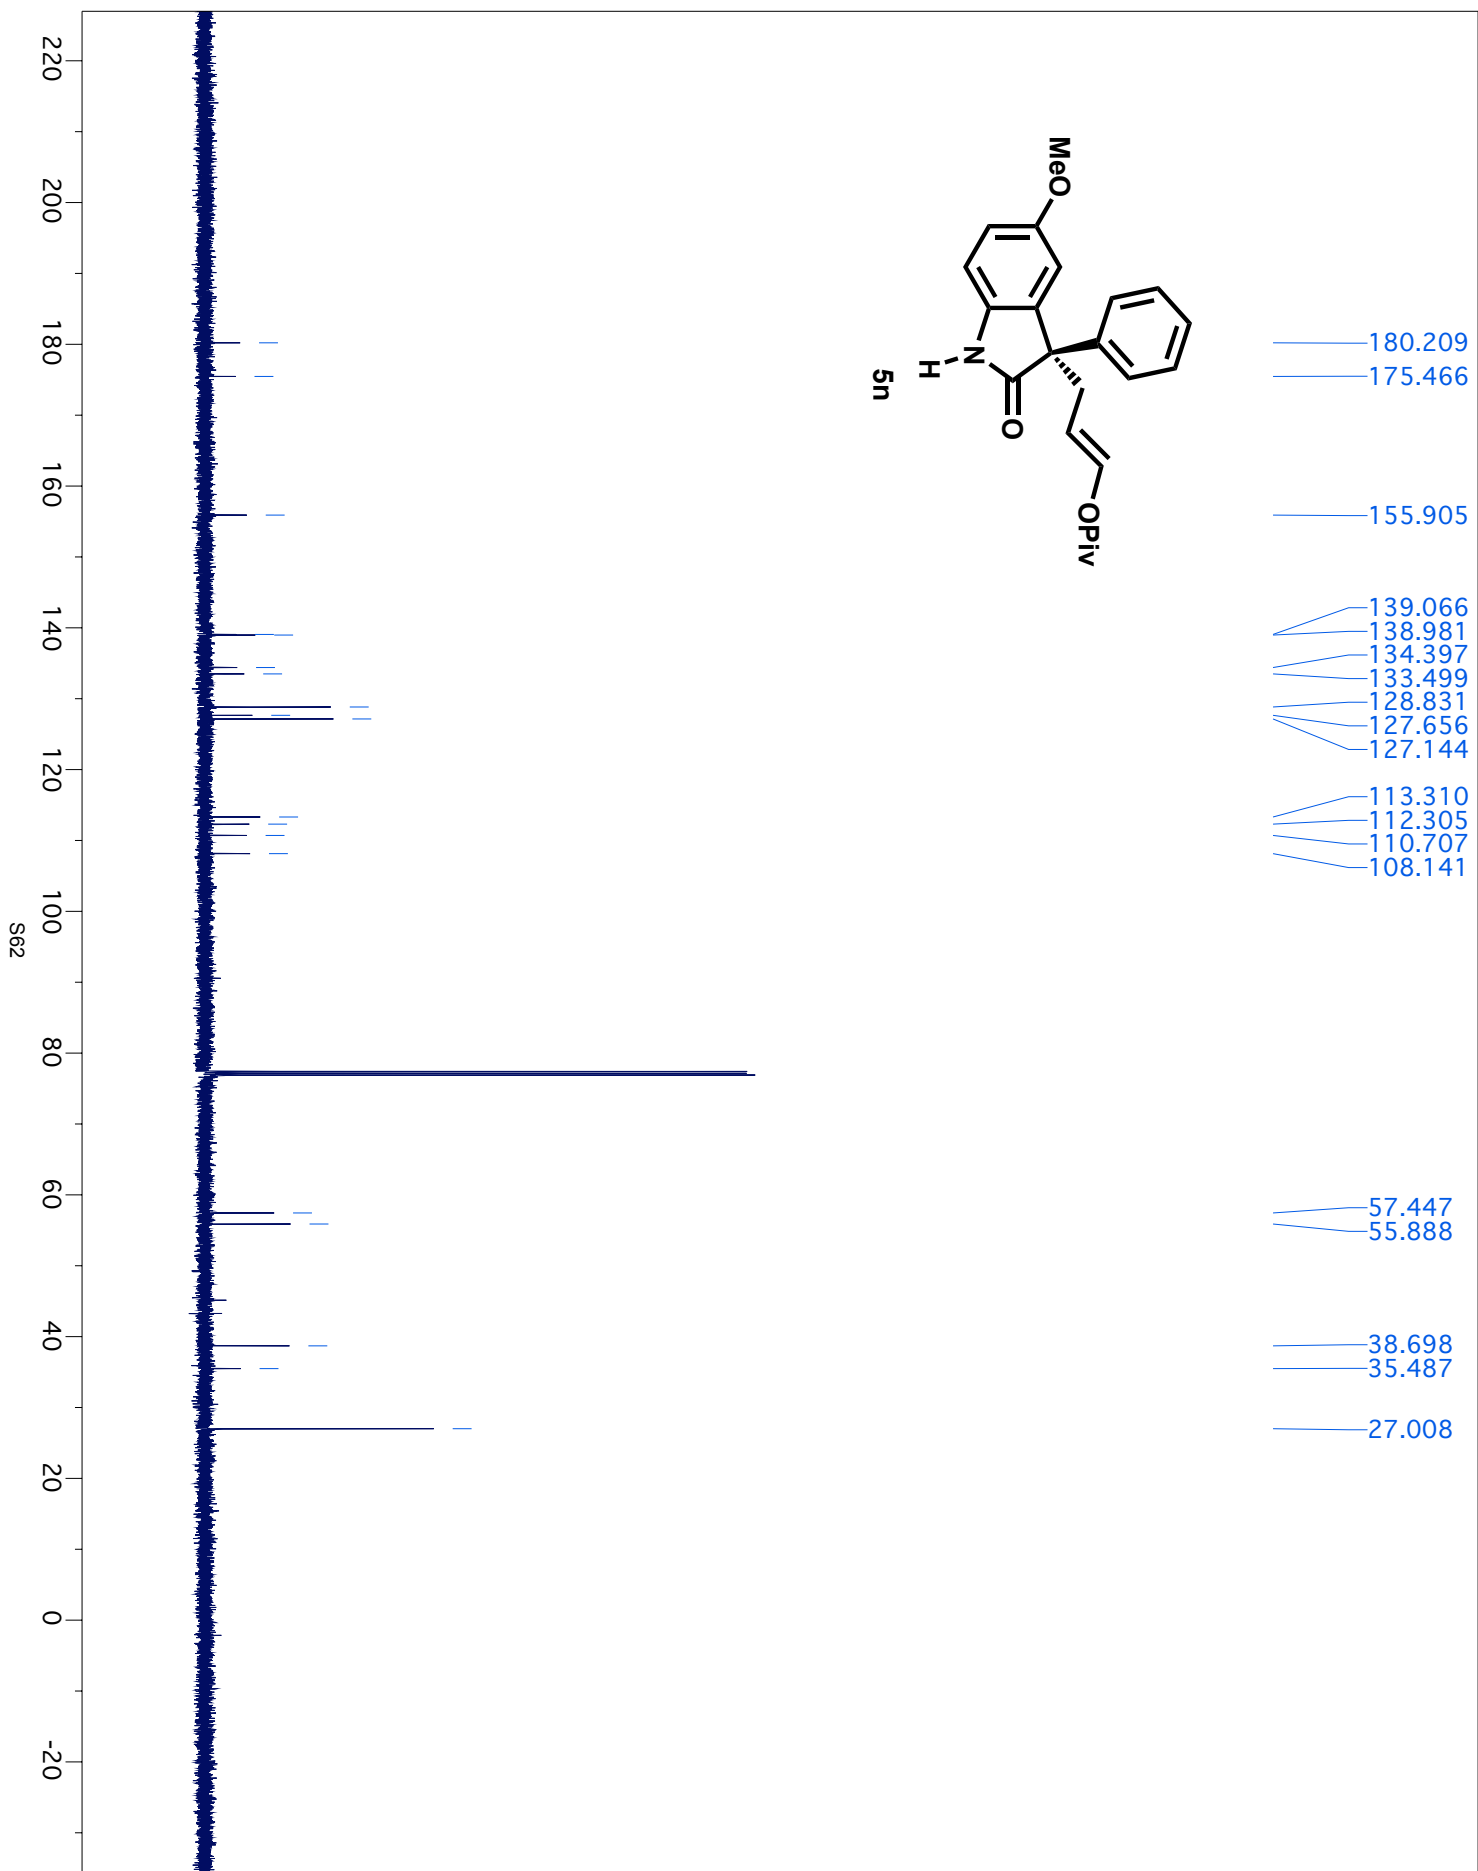

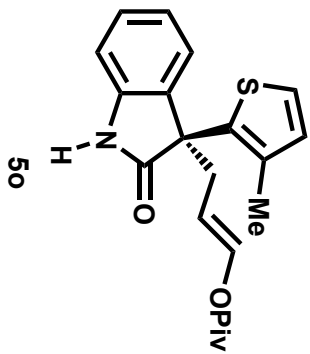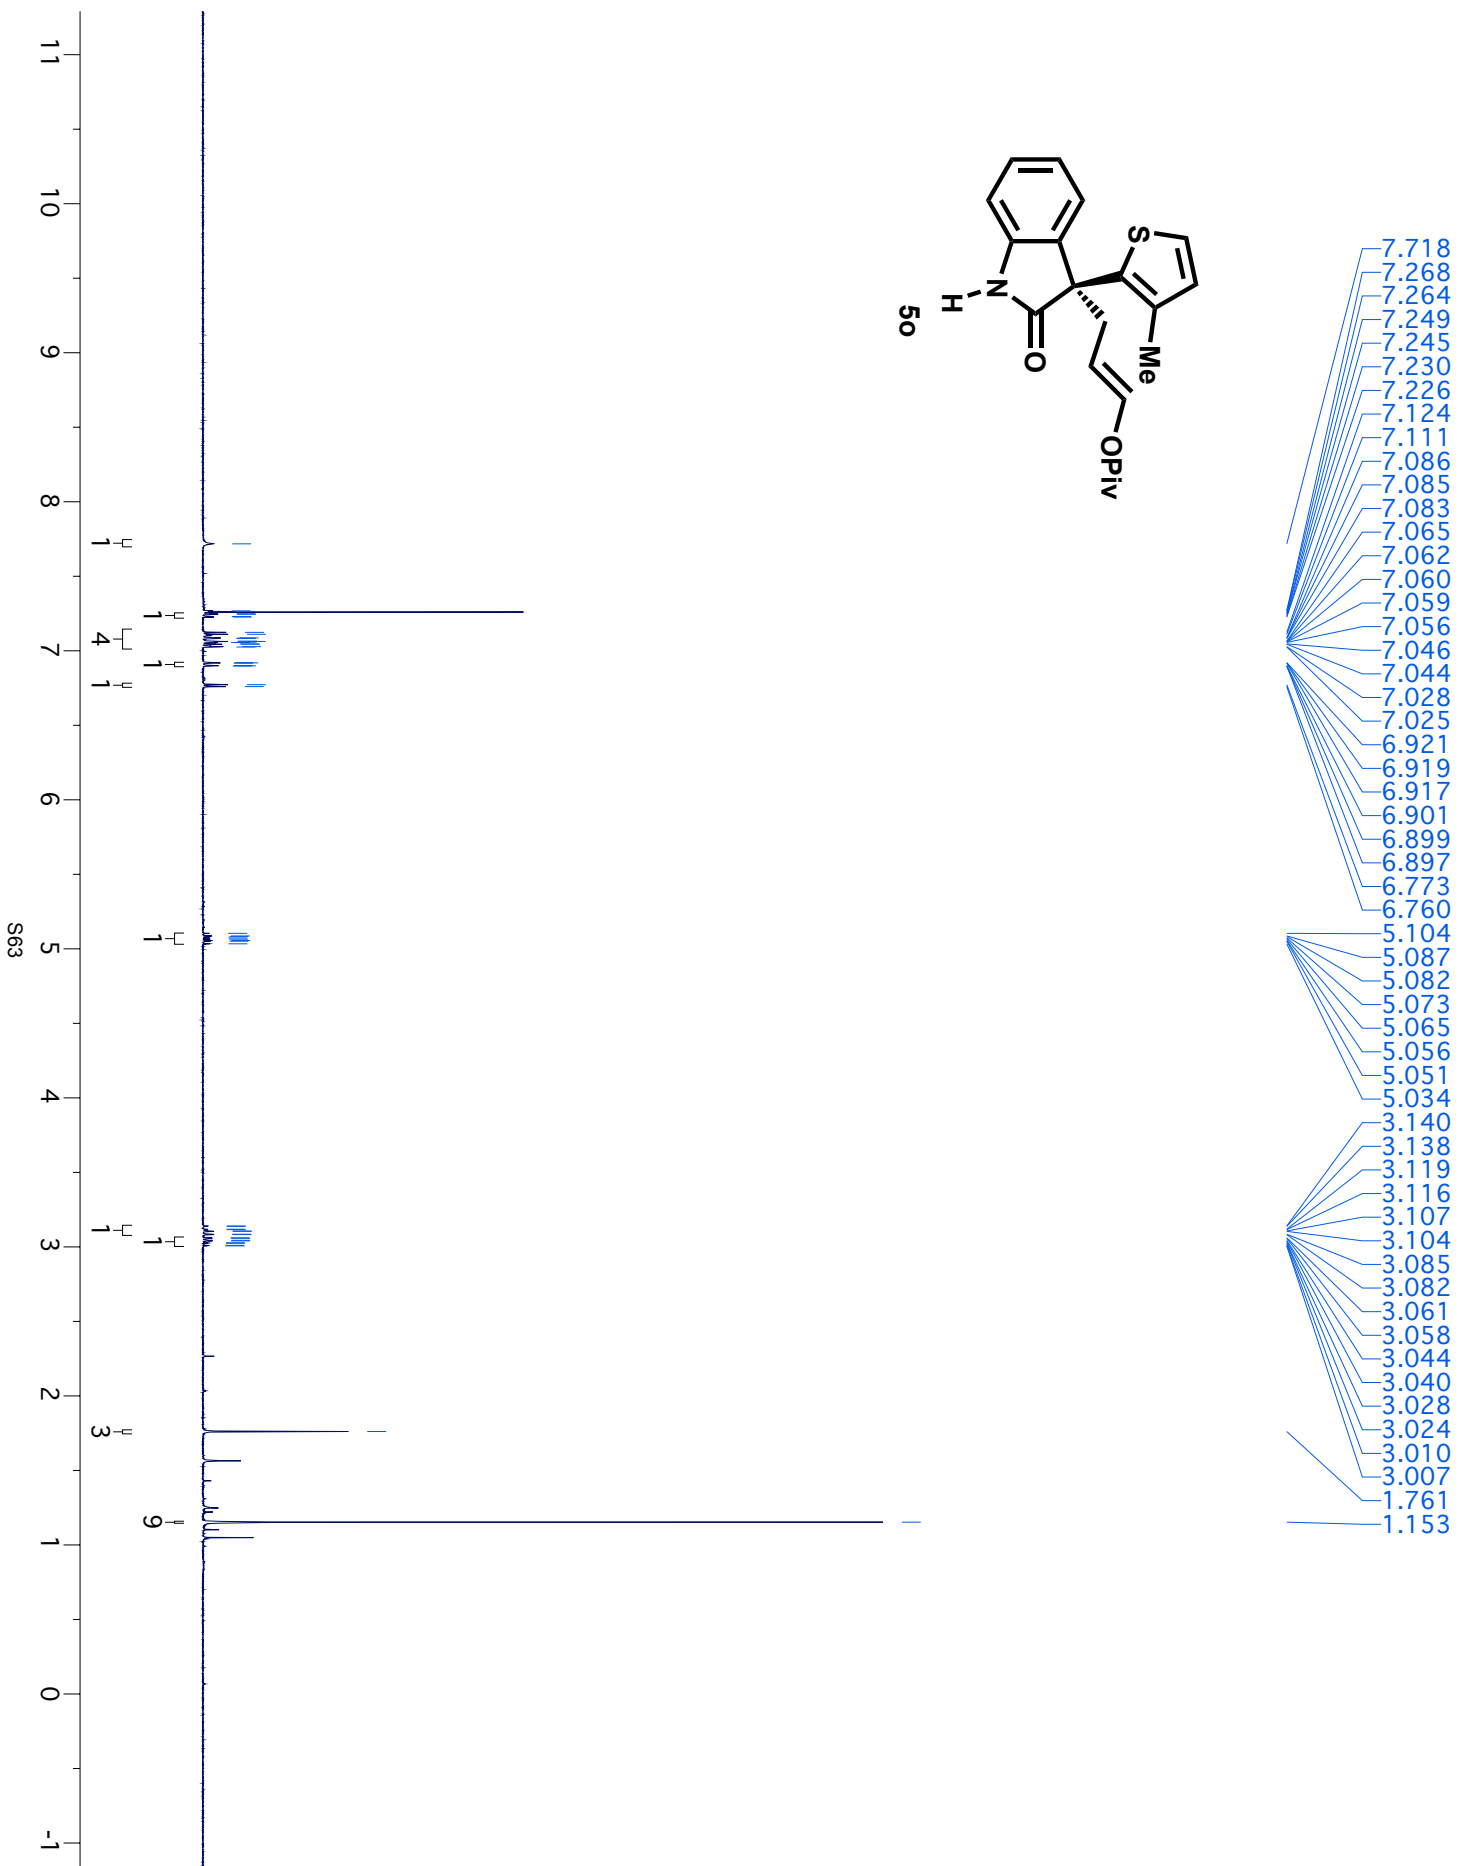

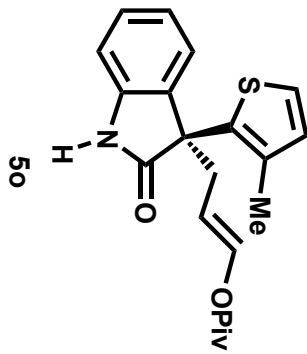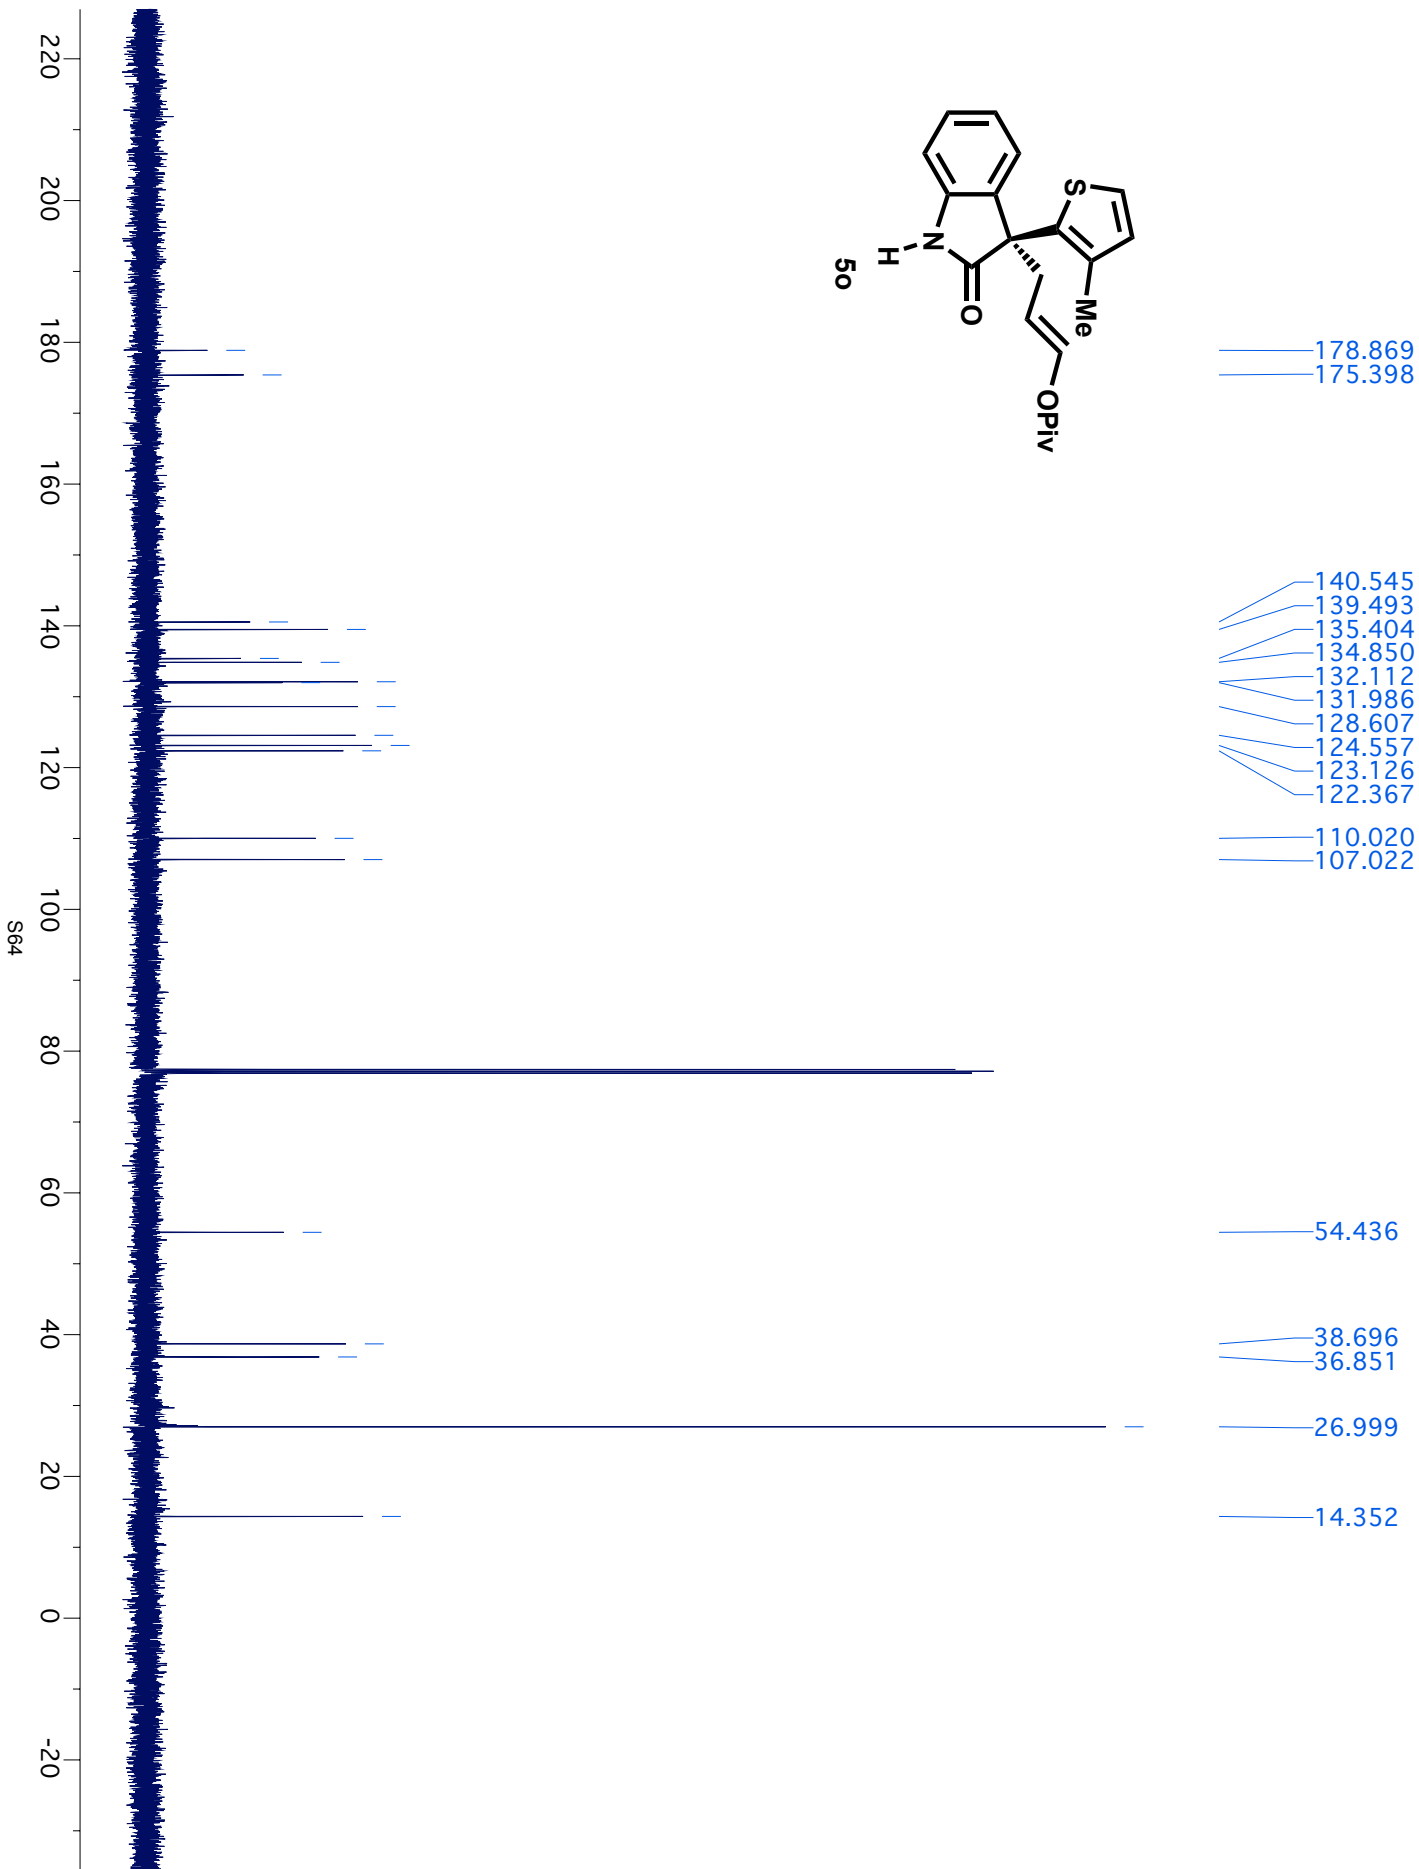

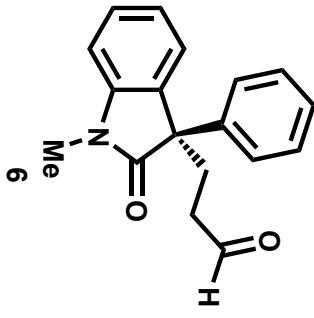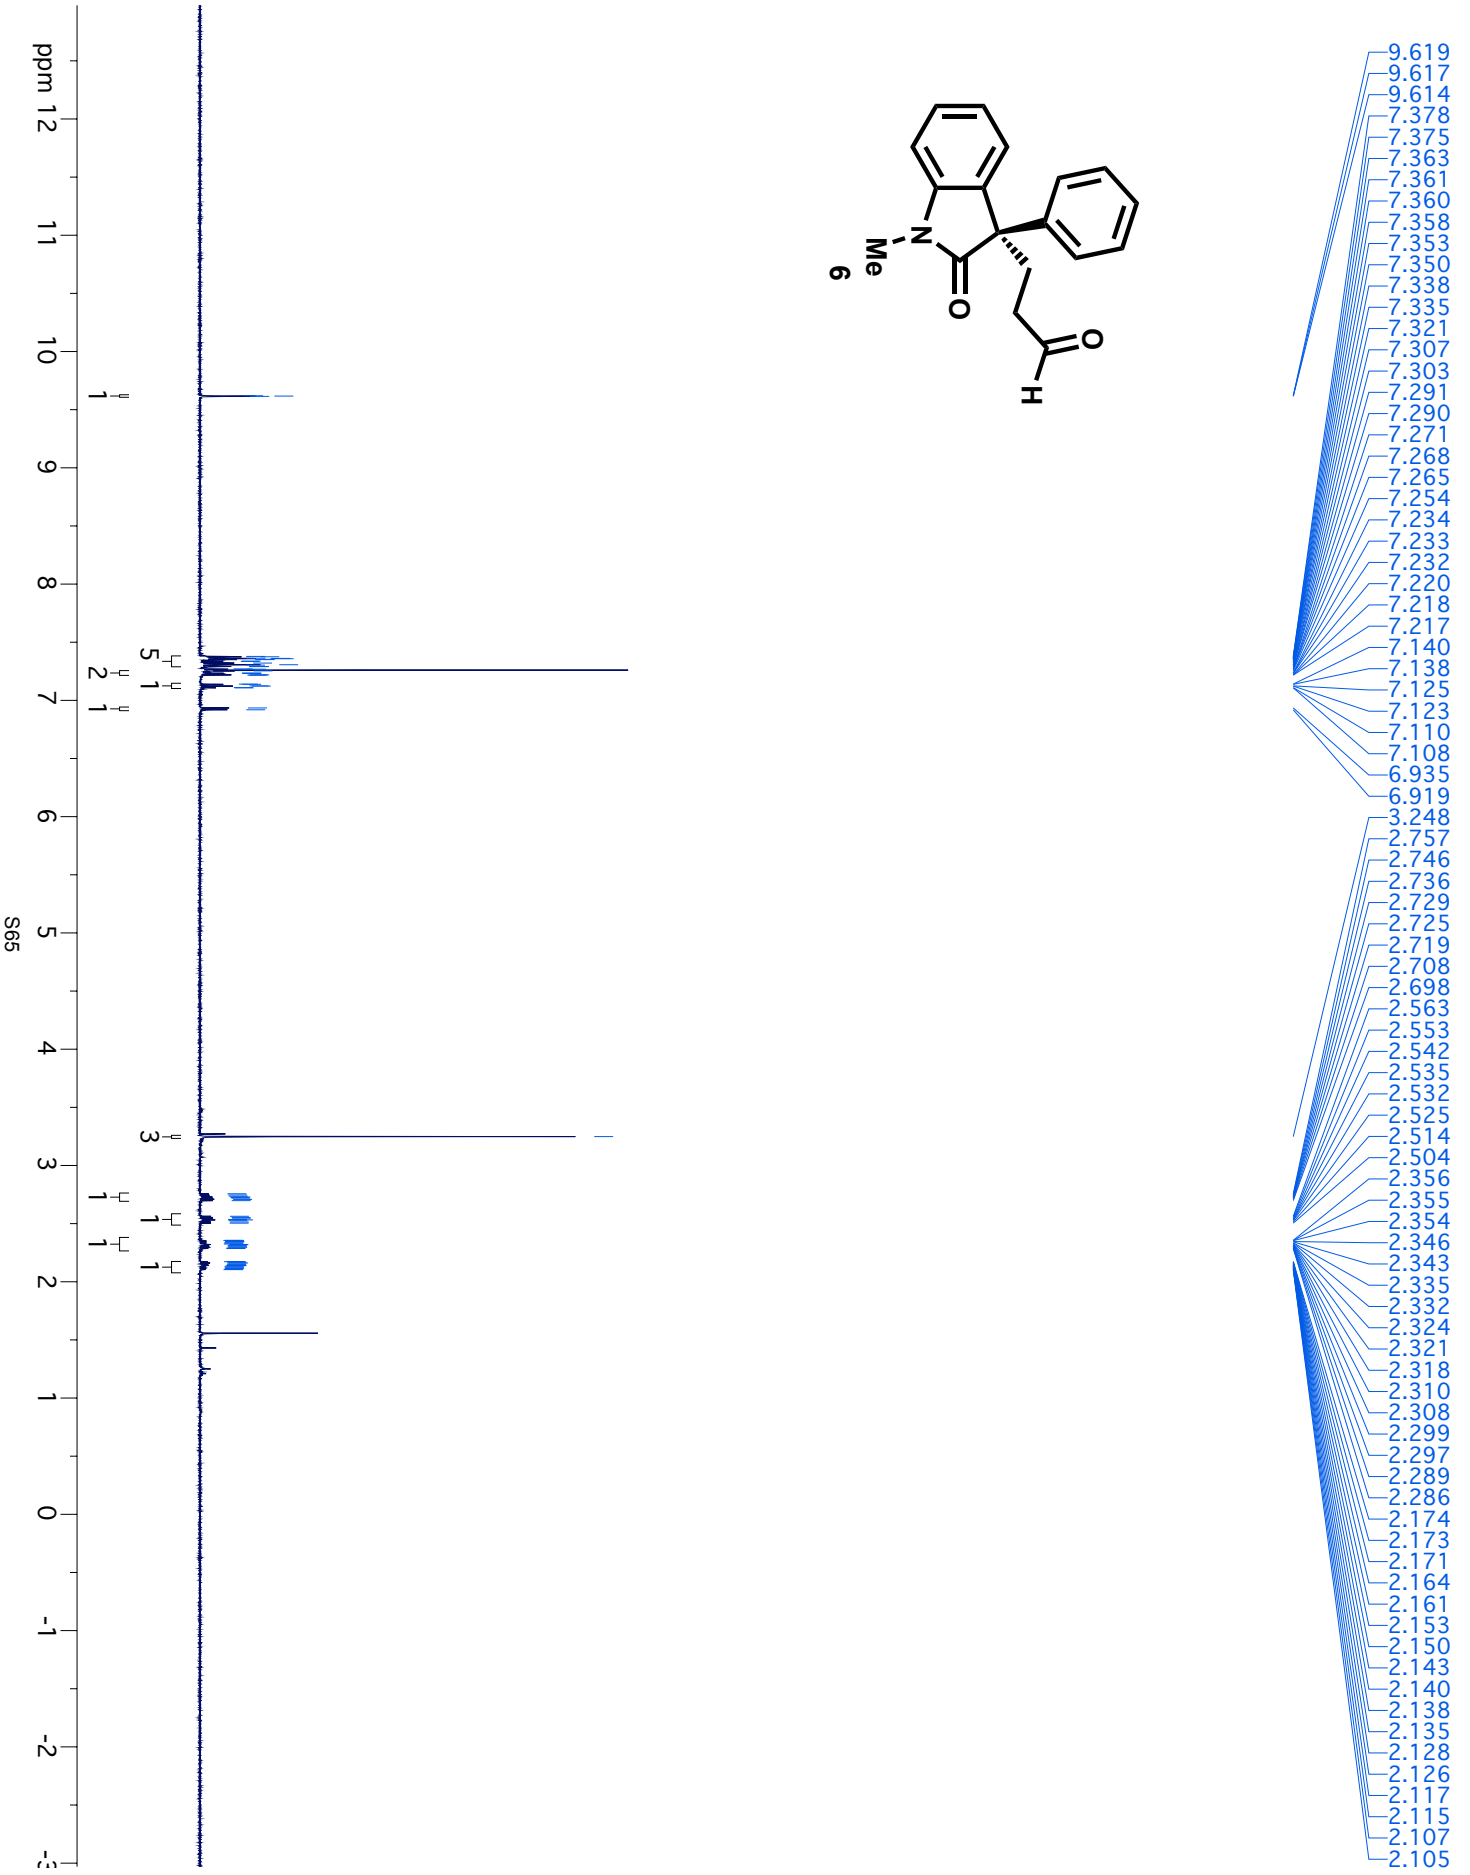



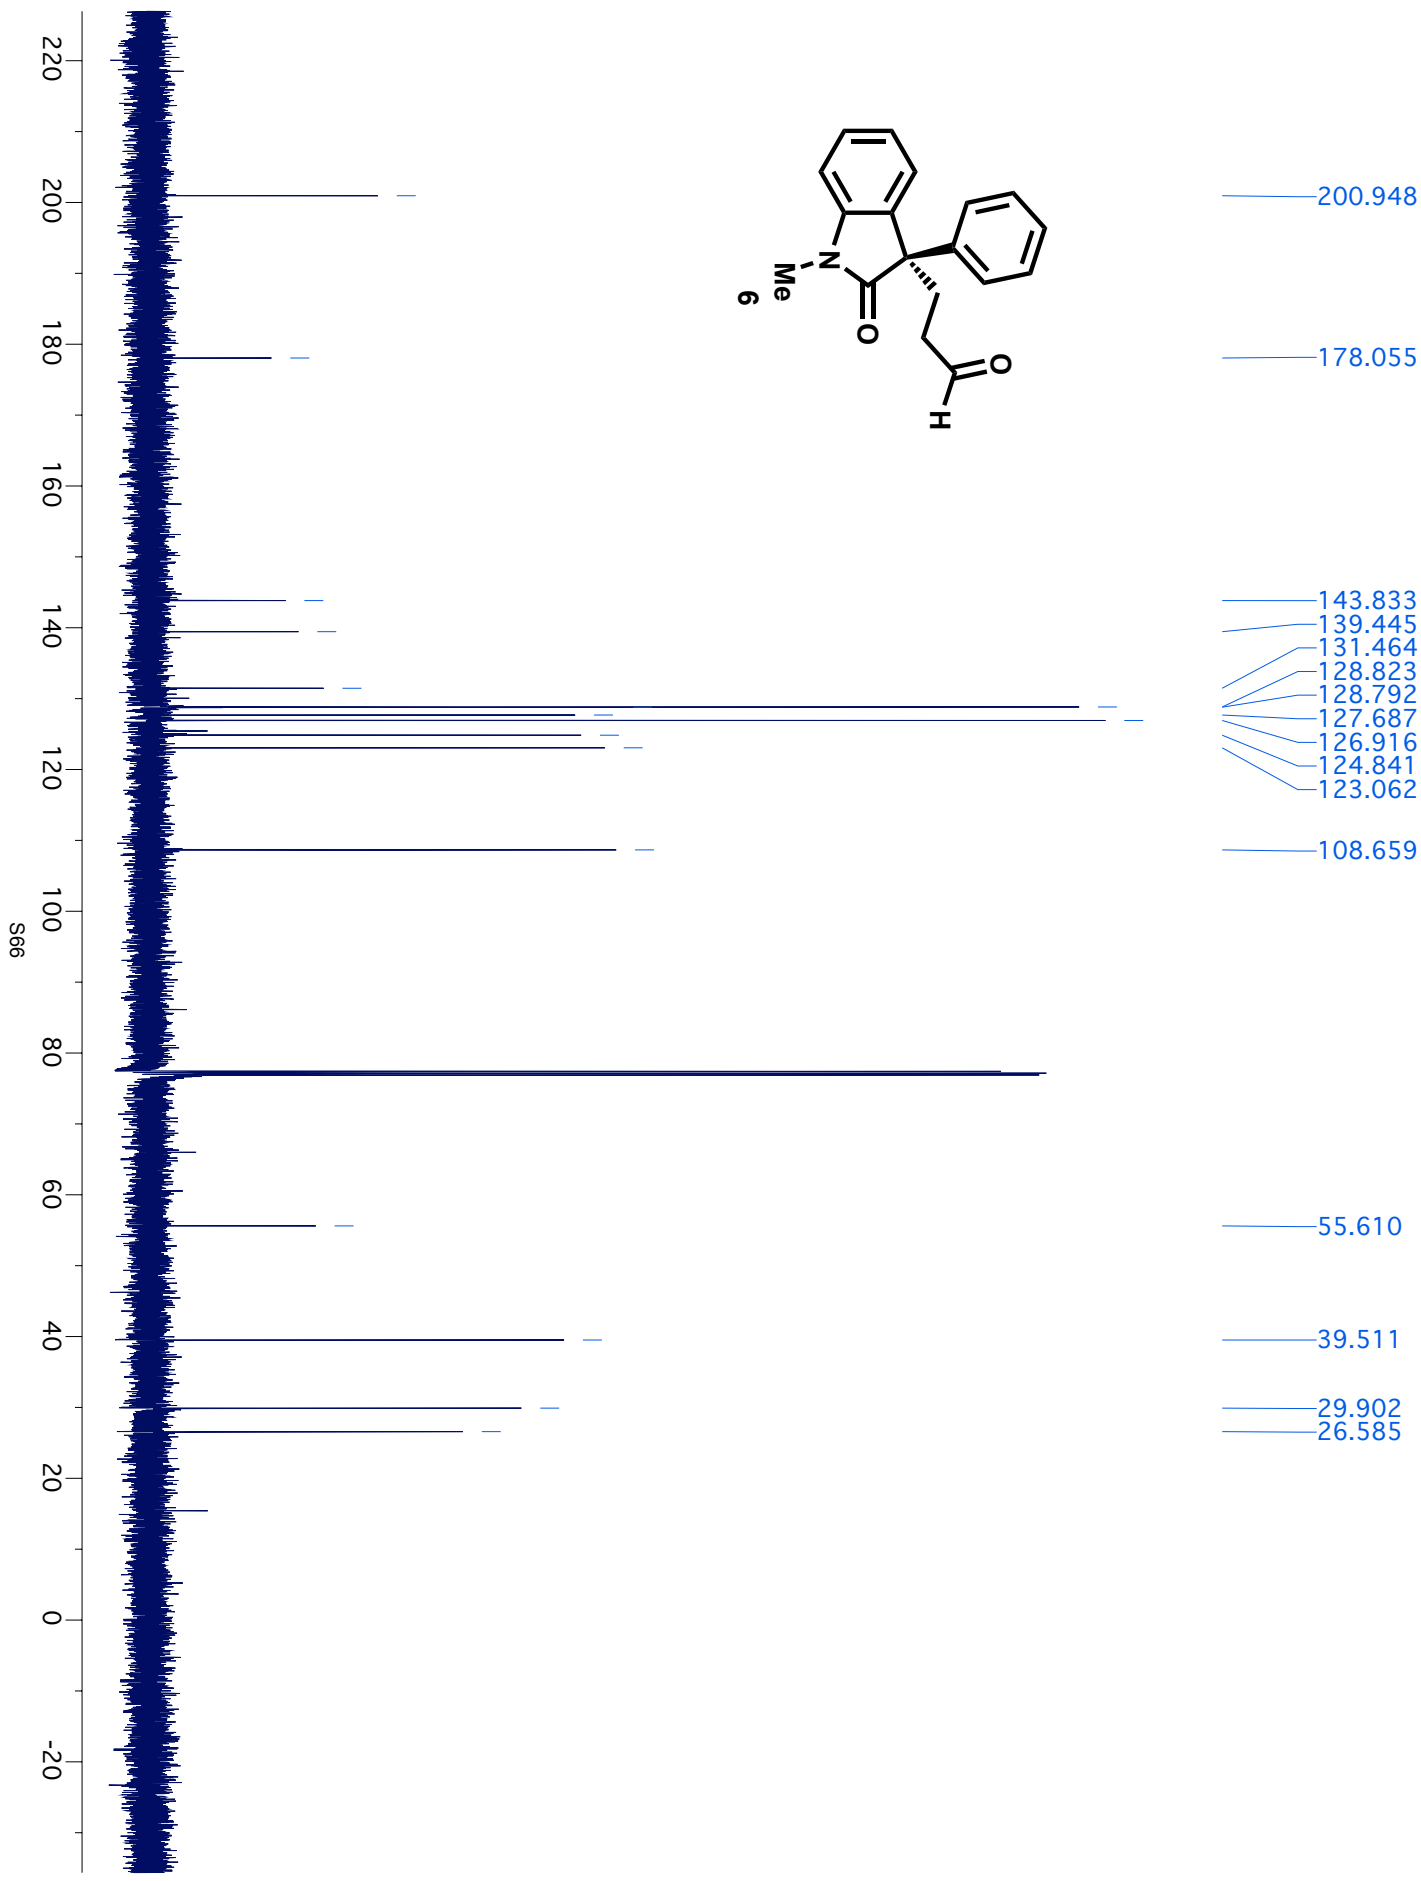

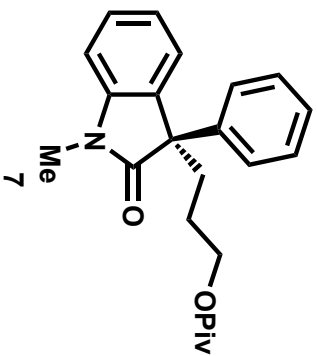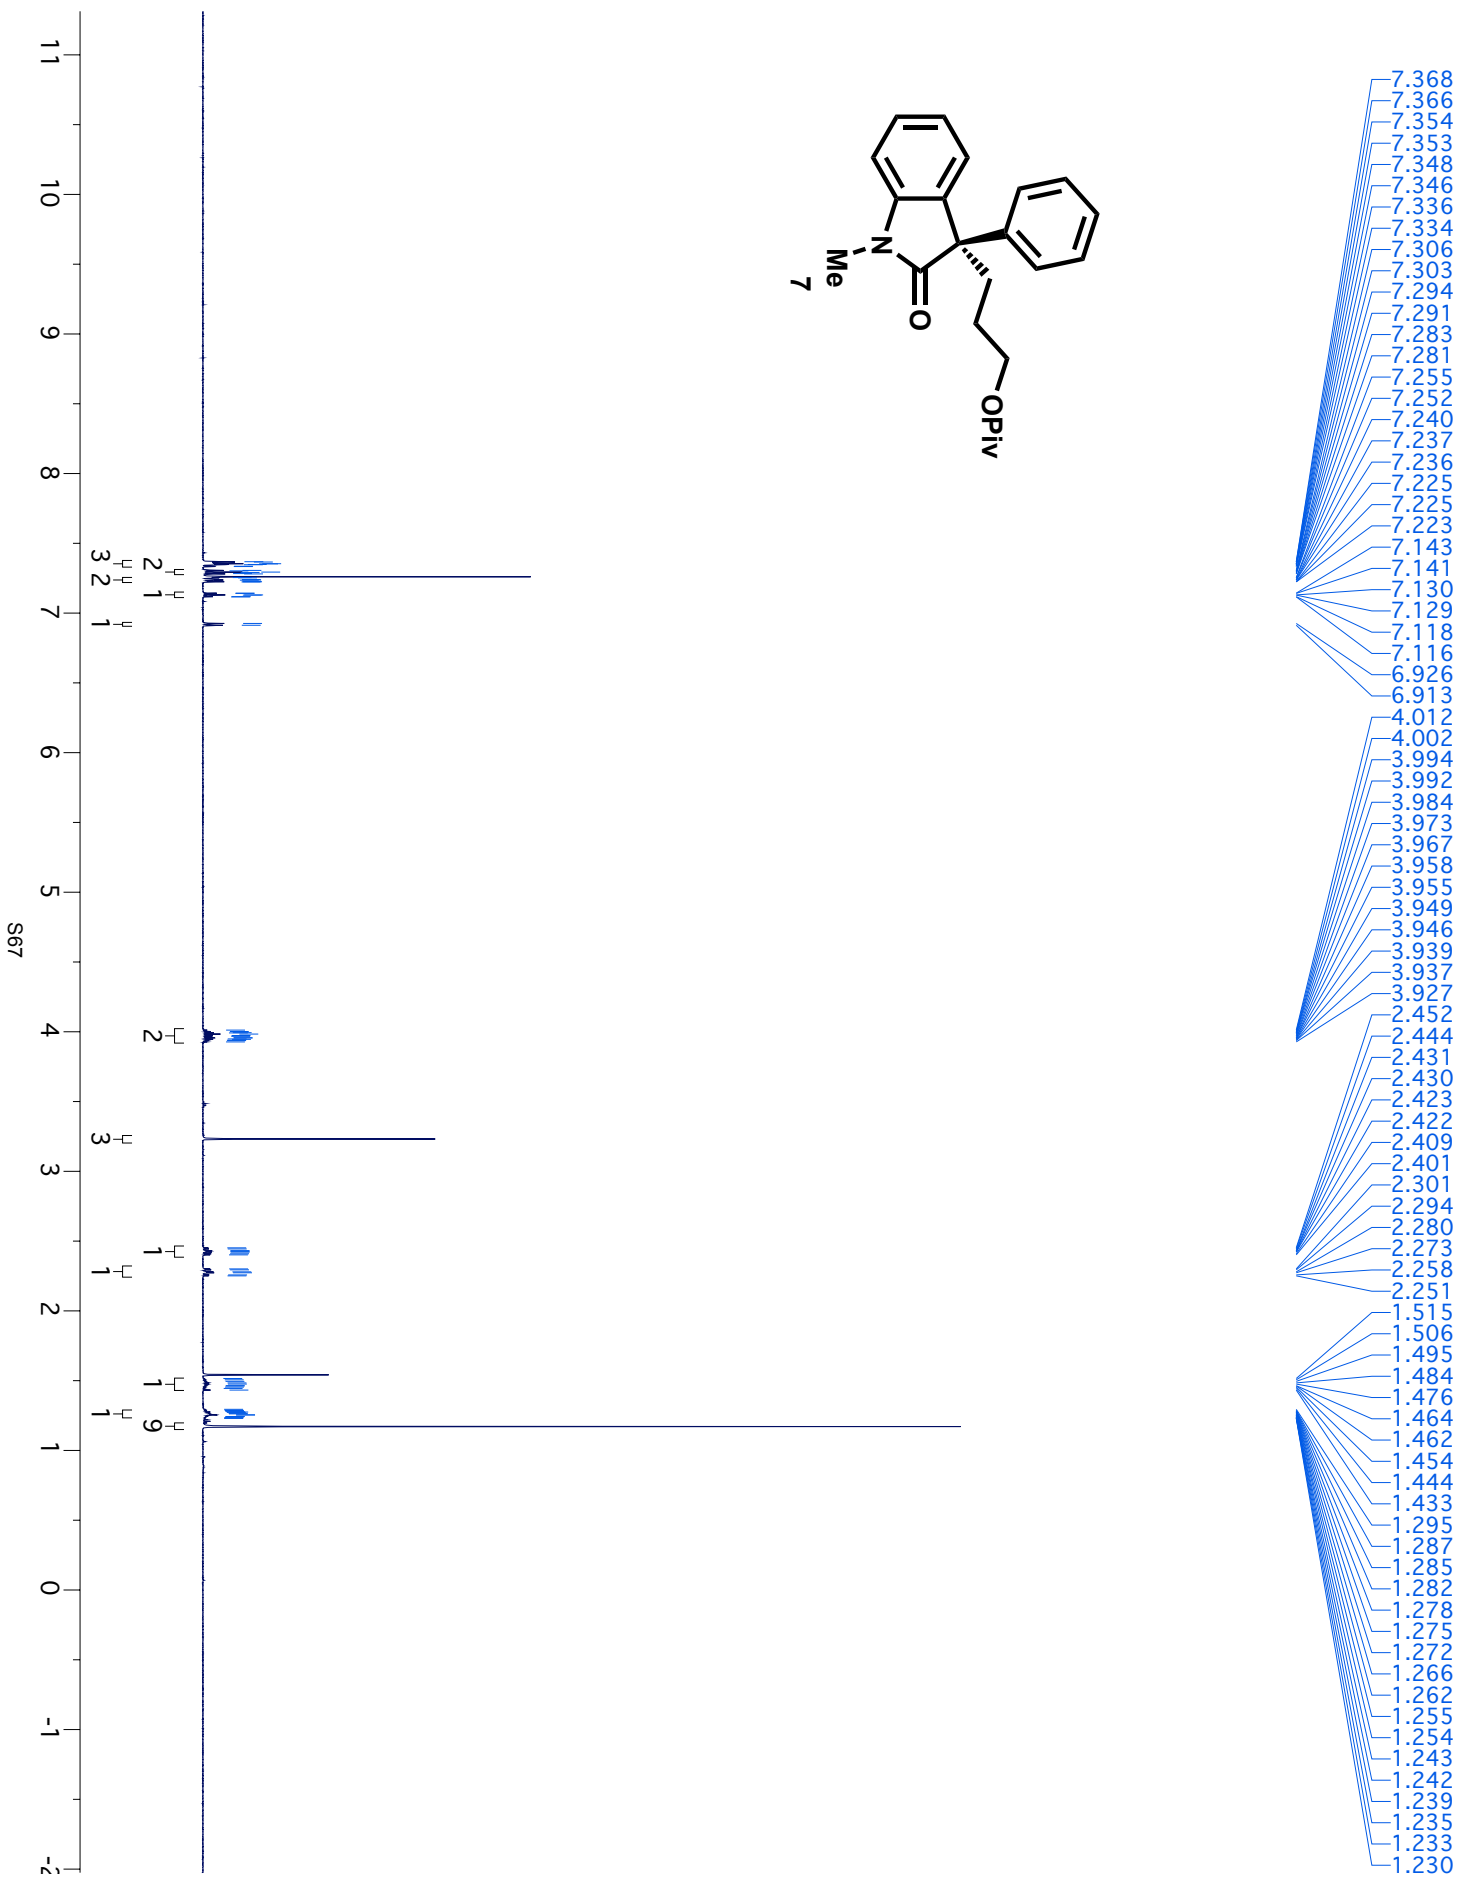

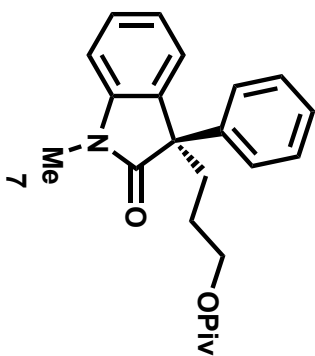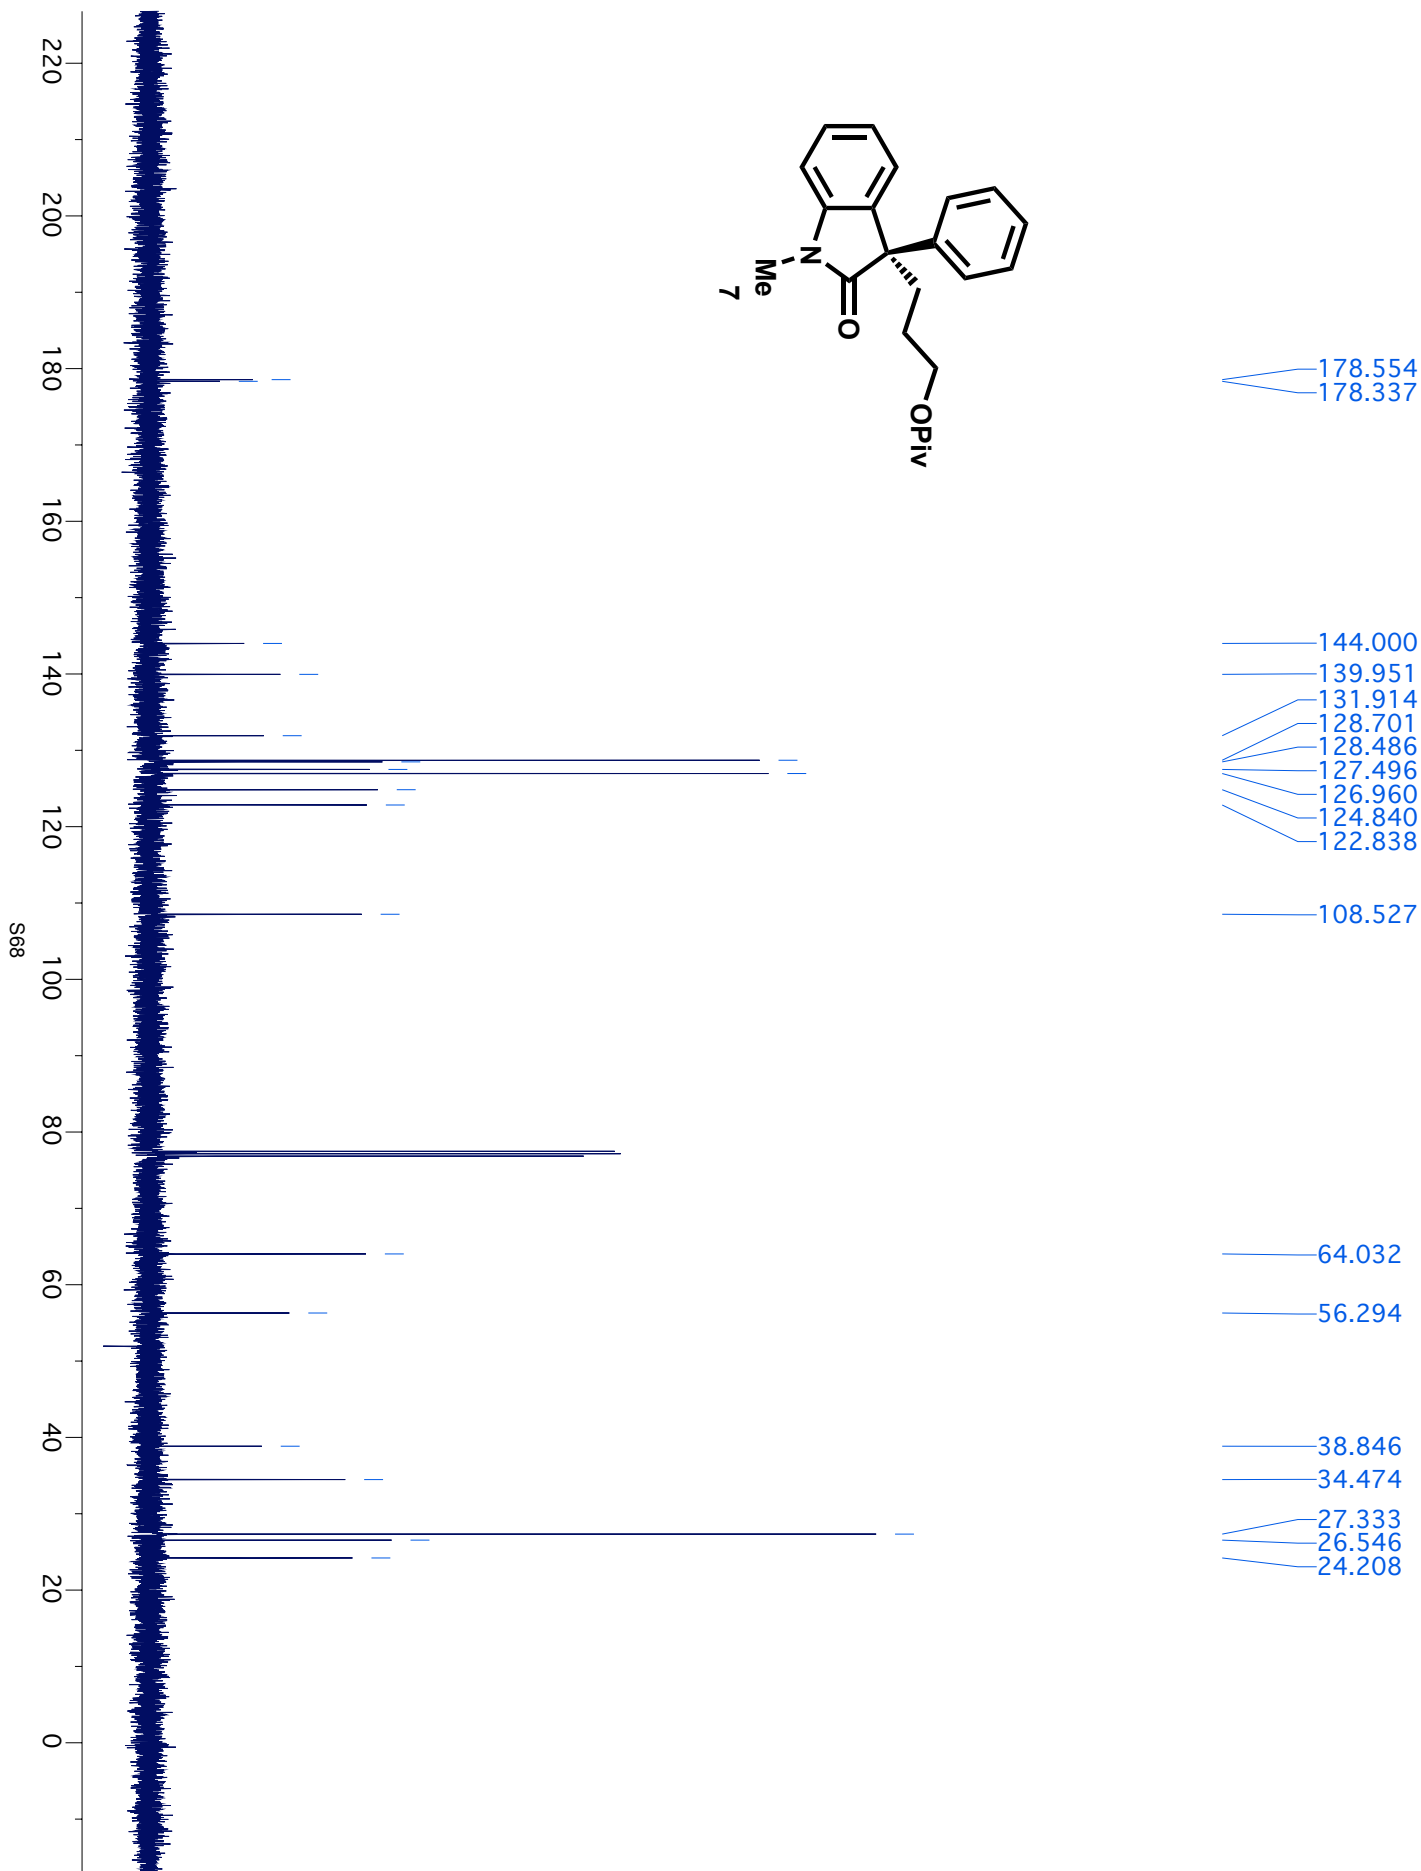

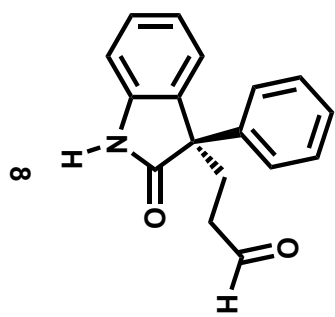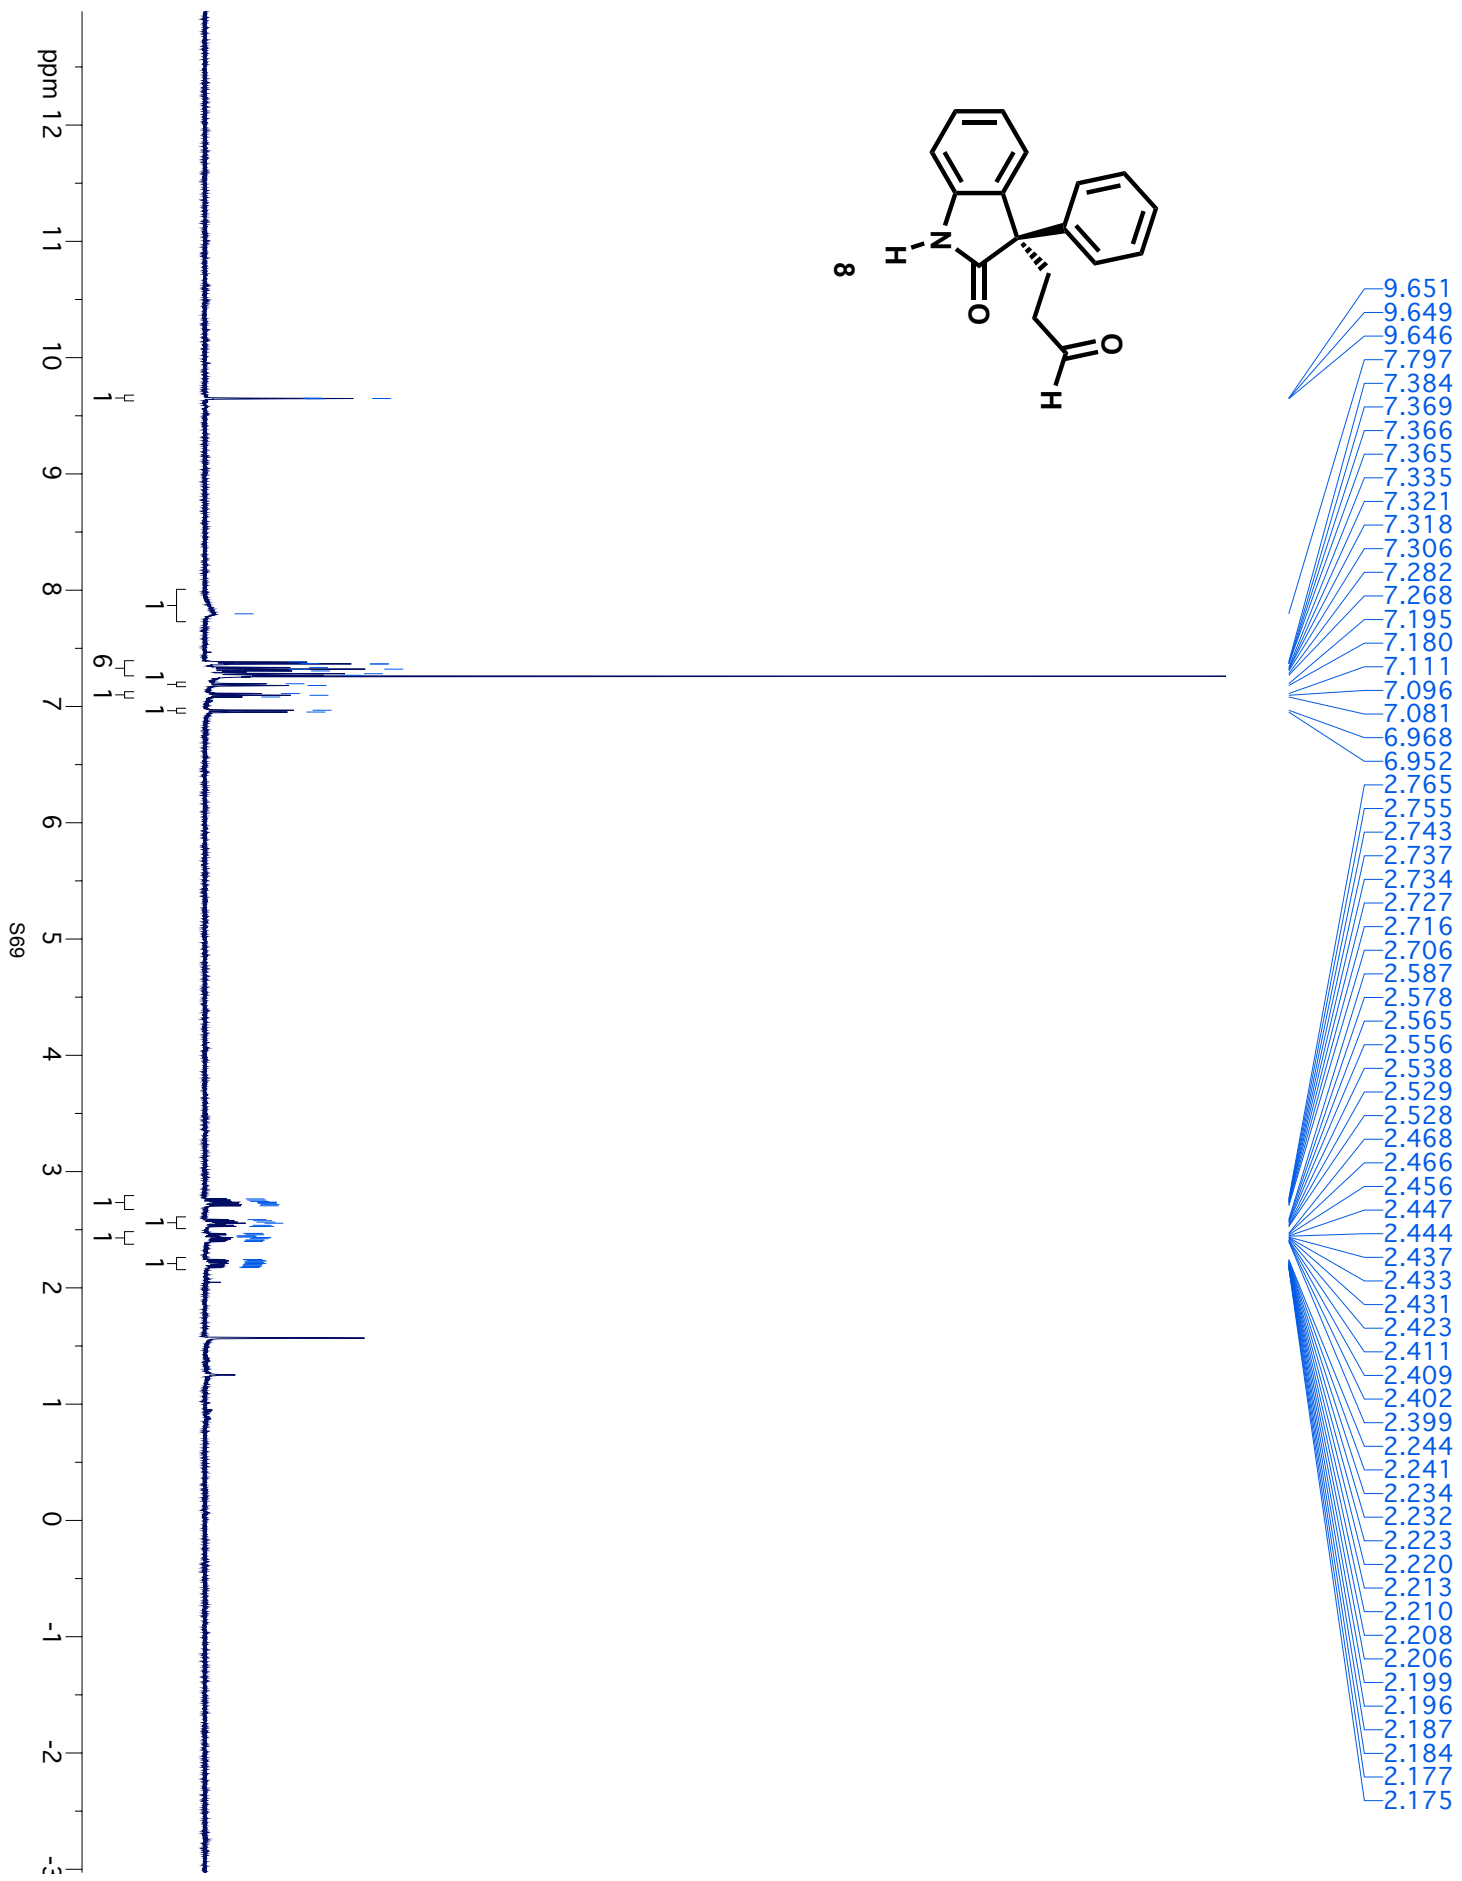

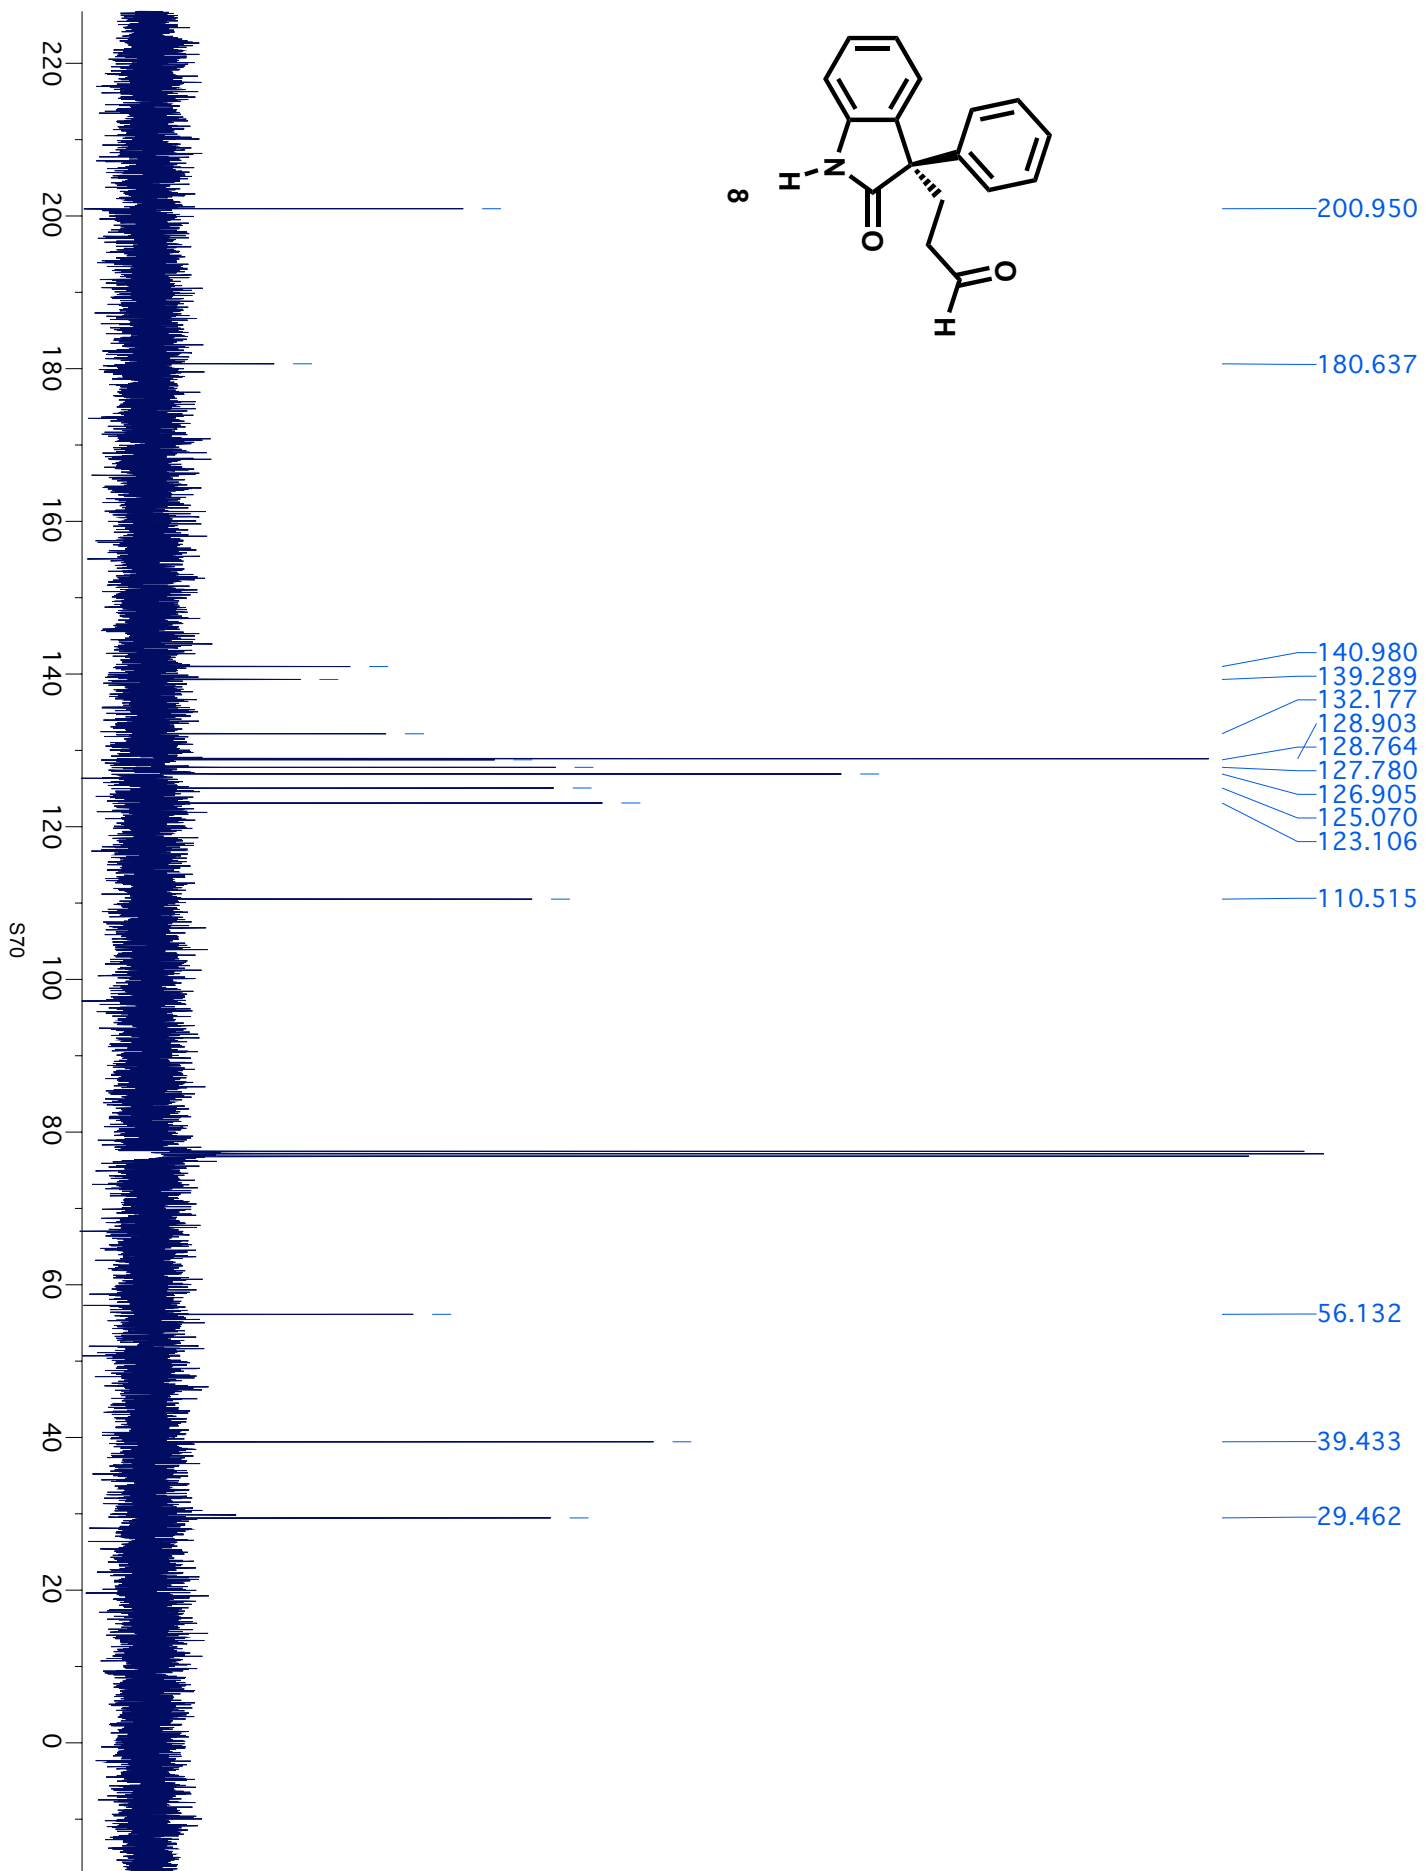

Supplement: NIHMS523191-supplement-Supporting_Information.pdf [file NIHMS523191-supplement-Supporting_Information.pdf]
